# Supplementary material
Source: Copernicus journal article supplement (doi:10.5194/egusphere-2026-2284)
Supplement: Supplementary file 1 [file egusphere-2026-2284-supplement.pdf]

# Supplementary material

## S1 Supplementary text

### S1.1 Speleothem Age depth models

#### S1.1.1 Stalagmite E0-B

5 Eight samples from stalagmite E0-B were analyzed for  $^{230}\text{Th}/\text{U}$  dating (Table S 3). The uranium content ranged from 476 to 555  $\text{ng g}^{-1}$ . Three samples were rejected due to low ( $^{230}\text{Th}/^{232}\text{Th}$ ) activity ratios ( $<200$ ). Of the remaining five, one was corrected using a stratigraphically derived ( $^{230}\text{Th}/^{232}\text{Th}$ ) ratio of  $43.75 \pm 24.25$ , while the other four used a mean ratio of  $35.5 \pm 32.5$ . The obtained age models for stalagmite E0-B exhibit overall mean uncertainties ranging from 117 to 224 years. The Bchron algorithm provides the tightest confidence intervals and  
10 thus aligns most closely with the weighted mean chronology. Based on the weighted mean of the used age models, stalagmite E0-B grew from  $633 \pm 161$  BC to  $403 \pm 54$  AD (Figure 4a). The growth rate in the lower part of the stalagmite (222–110 mm dft) was slightly lower at  $170 \mu\text{m a}^{-1}$  compared to the upper section (110–0 mm dft), where it increased to  $292 \mu\text{m a}^{-1}$ .

#### S1.1.2 Stalagmite E0-C

15 A total of 51 samples from stalagmite E0-C were analysed for  $^{230}\text{Th}/\text{U}$  dating (Table S 3). The uranium content ranged between 355 and 1324  $\text{ng g}^{-1}$ . 11 samples were rejected due to low ( $^{230}\text{Th}/^{232}\text{Th}$ ) activity ratios ( $<200$ ). The remaining 40 samples were corrected using individual ( $^{230}\text{Th}/^{232}\text{Th}$ ) ratios between 7 to 49, derived from both isochron techniques and stratigraphic constraints. One sample, taken at 81.5 mm dft, remained unordered chronologically and was excluded. As a result, the modelled chronologies for stalagmite E0-C display relatively  
20 low mean uncertainties across its three distinct growth phases, ranging overall from 33 to 69 years. Across all phases, the Bchron algorithm yields the tightest uncertainty intervals. Growth in E0-C was interrupted by two distinct hiatuses, and it is notable that the modelled durations of these gaps vary substantially depending on the algorithm's assumptions: the first hiatus (at  $\sim 40$  mm depth) spans from 95 (+58/–55) years (Linear Regression) to 179 (+85/–88) years (Bacon), while the second hiatus (at  $\sim 114$  mm depth) ranges from 175 (+80/–513) years  
25 (StalAge) to 196 years (+93 / –93) years (Linear Regression). Based on the weighted mean of the used age

models, the growth of E0-C can be divided into three periods separated by hiatuses: (1)  $538 \pm 56$  AD to  $811 \pm 52$  AD; (2)  $994 \pm 29$  AD to  $1311 \pm 15$  AD; and (3)  $1451 \pm 22$  AD to  $1835 \pm 53$  AD (Figure 4b). The average growth rates were  $372 \mu\text{m a}^{-1}$ ,  $294 \mu\text{m a}^{-1}$ , and  $94 \mu\text{m a}^{-1}$  for these periods, respectively. Due to a hiatus near the top, no age model is provided for the uppermost 5 mm. However, radiocarbon measurements from the top of the stalagmite  
30 indicate modern growth for this growth layers (post-1950 AD, Table S 1).

### S1.1.3 Stalagmite E1

A total of 25 samples from stalagmite E1 were analysed for  $^{230}\text{Th}/\text{U}$  dating (Table S 3). The uranium content ranged from 1202 to 2237  $\text{ng g}^{-1}$ . Twelve samples were excluded due to low ( $^{230}\text{Th}/^{232}\text{Th}$ ) activity ratios ( $<200$ ). Of the remaining 13 samples, one was corrected using a stratigraphically derived ratio of  $49 \pm 19$ . The other 12 were  
35 corrected with a mean ratio of  $35.5 \pm 32.5$ . The overall uncertainties for the stalagmite E1 age models range between 25 and 45 years. Over the entire dataset, StalAge provided the most tightly constrained uncertainty intervals. Stalagmite E1 comprises two distinct growth phases separated by a relatively brief hiatus at roughly 61 mm depth. The absolute timing of this interruption in stalagmite E1 spans from 1591 (+46/−35) AD to 1631 (+40/−65) AD according to Bacon, whereas Bchron shifts the onset of the event earlier, dating it from 1557 (+107/−27) AD to  
40 1636 (+21/−34) AD. The estimated duration of this hiatus varies slightly depending on the modelling approach, ranging from 41 (+80/−116) years (Linear Interpolation) to 79 (+34/−136) years (Bchron).

On average, stalagmite E1 grew from  $1440 \pm 39$  AD to approximately  $1577 \pm 42$  AD, with a growth rate of  $281 \mu\text{m a}^{-1}$  (Figure 4c). Growth resumed around  $1635 \pm 24$  AD and continued until approximately  $1926 \pm 20$  AD at  $\sim 3$  mm dft, with a growth rate of  $\sim 230 \mu\text{m a}^{-1}$ . It was also possible to count individual growth years based on seasonal  
45 Sr/Ca variations obtained through LA-ICP-MS measurements. For the section between 3 and 61 mm dft,  $311 \pm 16$  Sr/Ca cycles were counted, while for the lower portion between 61 and 96 mm dft, a total of  $182 \pm 9$  cycles were counted. To test the reliability of the detritus-corrected  $^{230}\text{Th}/\text{U}$  ages, the Sr/Ca-based age-depth model for the section between 3 and 61 mm dft was anchored to the  $^{230}\text{Th}/\text{U}$  age at 39 mm dft, which contained no measurable  $^{232}\text{Th}$  and thus required no detrital Th correction (Figure 4c). For the lower section, the Sr/Ca-based age-depth  
50 model was anchored to the bottommost  $^{230}\text{Th}/\text{U}$  age, corresponding to the highest ( $^{230}\text{Th}/^{232}\text{Th}$ ) activity ratio in this section, minimizing detrital Th correction influence. With a mean absolute deviation of just 9–10 years, both models align perfectly when considering the uncertainties of the  $^{230}\text{Th}/\text{U}$ -based and Sr/Ca-based age-depth models. No age model is provided for the top section due to a hiatus at 3 mm dft. However, radiocarbon measurements from the top of the stalagmite indicate modern growth (post-1950 AD, Table S 1).

#### 55 **S1.1.4 Stalagmite E4**

A total of 28 samples from stalagmite E4 were analyzed for  $^{230}\text{Th}/\text{U}$  dating (Table S 3). The uranium content ranged from 604 to 1740  $\text{ng g}^{-1}$ . Most samples ( $n=24$ ) were excluded due to high  $^{232}\text{Th}$  concentrations of up to 26.5  $\text{ng g}^{-1}$ , resulting in ( $^{230}\text{Th}/^{232}\text{Th}$ ) activity ratios below 200. One isochron, constructed from three samples, yielded an initial ( $^{230}\text{Th}/^{232}\text{Th}$ ) activity ratio of  $8.2 \pm 1.3$ , with a probability of fit  $>0.05$  and an MSWD of 0.0001 (Figure S 5d) (Vermeesch, 2018). Two of these samples were corrected using this isochron-derived ratio ( $8.2 \pm 1.3$ ), while the remaining two samples from the top part of the stalagmite were corrected with a mean ratio of  $35.5 \pm 32.5$ . As a result, the modelled chronologies for stalagmite E4 display a relatively large spread in mean uncertainties, ranging from 67 years to over 314 years. On average, stalagmite E4 grew from approximately  $228 \pm 88$  AD to  $1611 \pm 118$  AD, with an average growth rate of  $53 \mu\text{m a}^{-1}$ , assuming uninterrupted and constant growth (Figure 4d).

#### 65 **S1.1.5 Stalagmite E8**

A total of 15 samples from stalagmite E8 were analyzed for  $^{230}\text{Th}/\text{U}$  dating (Table S 3). The uranium content ranged from 524 to 1368  $\text{ng g}^{-1}$ . Seven samples were excluded due to low ( $^{230}\text{Th}/^{232}\text{Th}$ ) activity ratios ( $<200$ ). One isochron, derived from four samples with a probability of fit  $>0.05$  and an MSWD of 0.016, yielded an initial ( $^{230}\text{Th}/^{232}\text{Th}$ ) activity ratio of  $6.4 \pm 2.4$  (Figure S 5e) (Vermeesch, 2018). Between 3 and 43 mm dft, individual growth years were counted based on seasonal Sr/Ca variations obtained through LA-ICP-MS measurements. Three distinct growth phases were identified in stalagmite E8:

1. Lower Section (65–50 mm dft): Due to only two samples with overlapping ages, no age-depth model was constructed for this section. However,  $^{230}\text{Th}/\text{U}$  ages at 60.5 and 55 mm dft suggest some growth between 565 and 927 AD (Figure 4e).
- 75 2. Middle Section (50–27.9 mm dft): Following a hiatus at 50 mm dft, growth resumed. The sample at 29 mm dft, corrected with the isochron-derived ratio ( $6.4 \pm 2.4$ ), yielded an age of  $1541 \pm 9$  AD. However, the uncorrected age at 42 mm dft ( $1533 \pm 9$  AD) was inconsistent with the  $40 \pm 2$  Sr/Ca layers counted between 29 and 42 mm dft. As a result, no definitive age model was constructed for this section.
- 80 3. Upper Section (27.9–0.8 mm dft): After a minor growth interruption at 27.9 mm dft, growth continued until 0.8 mm dft. The layer-counted age-depth model was anchored to the  $^{230}\text{Th}/\text{U}$  age at 14.5 mm dft, corrected with a broad ( $^{230}\text{Th}/^{232}\text{Th}$ ) ratio of  $35.5 \pm 32.5$ , as this sample was least affected by detrital Th. Ages for the remaining samples (8.5–26 mm dft) were corrected with individual ( $^{230}\text{Th}/^{232}\text{Th}$ ) ratios ranging from 7 to 35.5 to match the Sr/Ca-based age-depth model. Considering the uncertainties of the anchor age and Sr/Ca layer counting ( $\pm 0.5$

layers per 10 counted layers). As a result, the modelled chronologies for the last growth phase of stalagmite E8  
85 display highly constrained mean uncertainties across all methods, ranging narrowly from 24 to 42 years. Overall,  
speleothem E8 deposition can be constrained to around  $1605 \pm 24$  AD and continued at an average rate of  $215$   
 $\mu\text{m a}^{-1}$  until  $1733 \pm 33$  AD, when growth ceased at 0.8 mm dft.

No seasonal Sr/Ca layers were visible in the topmost 0.8 mm, making it impossible to determine the time span  
covered by this section. However, radiocarbon measurements from the top of the stalagmite indicate modern growth  
90 (post-1950 AD, Table S 1).

### S1.1.6 Stalagmite E23-3

A total of eight samples from stalagmite E23-3 were analyzed for  $^{230}\text{Th}/\text{U}$  dating (Table S 3). The uranium content  
ranged between 1134 and 1501  $\text{ng g}^{-1}$ . All samples exhibited low  $^{232}\text{Th}$  concentrations ( $<0.06 \text{ ng g}^{-1}$ ), resulting in  
( $^{230}\text{Th}/^{232}\text{Th}$ ) activity ratios  $>200$ , except for the two topmost ones, due to their young age. The uncorrected ages  
95 were in stratigraphic order. As with stalagmites E1 and E8, individual growth years were determined based on  
seasonal Sr/Ca variations. From 0 to 84 mm dft, a total of  $331 \pm 17$  layers were counted. Assuming the topmost  
layer corresponds to 2022 AD (the year of collection), the layer at 84 mm depth was deposited around  $1691 \pm 17$   
AD. This information was used to estimate detrital thorium contributions to the  $^{230}\text{Th}/\text{U}$  ages, leading to the  
selection of an ( $^{230}\text{Th}/^{232}\text{Th}$ ) activity ratio of  $26 \pm 7$  to align the  $^{230}\text{Th}/\text{U}$  ages with the layer-counted model within  
100 uncertainties. For the final age-depth model, an artificial sample at the stalagmite top with an age of 2022 AD was  
included. As a result, the modelled chronologies for stalagmite E23-3 display small mean uncertainties, ranging  
from roughly 11 to 61 years. Because this specific stalagmite exhibited a highly constant, stable growth rate  
throughout its formation, the Linear Regression algorithm proved as robust approach. When comparing the models  
to the available layer counting chronology, the Bacon algorithm provided the closest match to the visual layer  
105 counts, with a mean absolute deviation of just 6.6 years. Consequently, the growth history of stalagmite E23-3 is  
divided into two periods, separated by a growth interruption at 167 mm dft (Figure 4f).

1. Older Part (188–167 mm dft): Two  $^{230}\text{Th}/\text{U}$  ages indicate growth from  $1070 \pm 7$  AD to  $1347 \pm 9$  AD, with  
an average growth rate of  $283 \mu\text{m a}^{-1}$ .
2. Upper Part (167–0 mm dft): Spanning  $1441 \pm 5$  AD to 2022 AD (assuming continuous growth), this period  
110 is represented by five  $^{230}\text{Th}/\text{U}$  ages, including the artificial age of 2022 AD at the top. The average growth  
rate is  $269 \mu\text{m a}^{-1}$ , similar to the older portion.

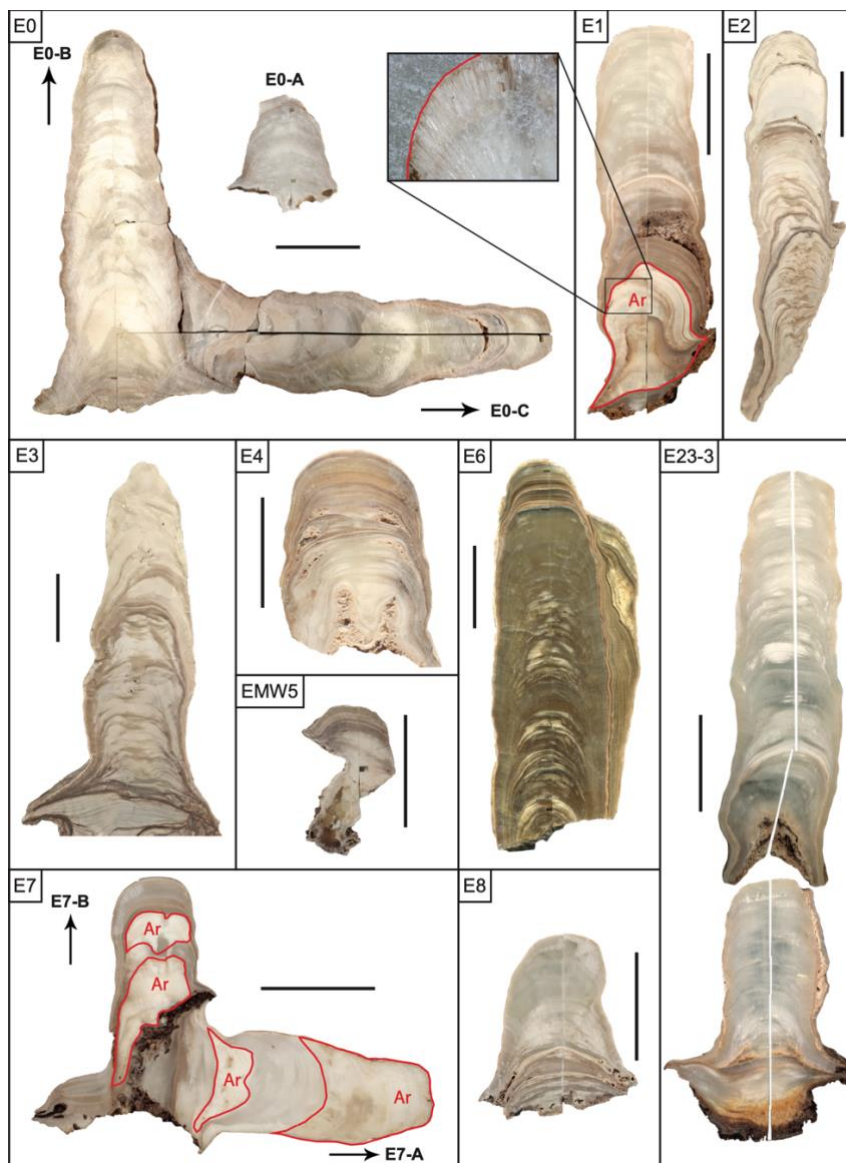

115

Figure S 1 Scans of slices from ten stalagmites recovered from Áaktun Kóopo Cave during field trips in 2018 and 2023. The black scale bar represents 5 cm in all images. Red outlines indicate macroscopically identifiable aragonite phases in stalagmites E1 and E7. The inset of stalagmite E1 shows millimeter-long aragonite crystals adjacent to a more compact calcite phase.

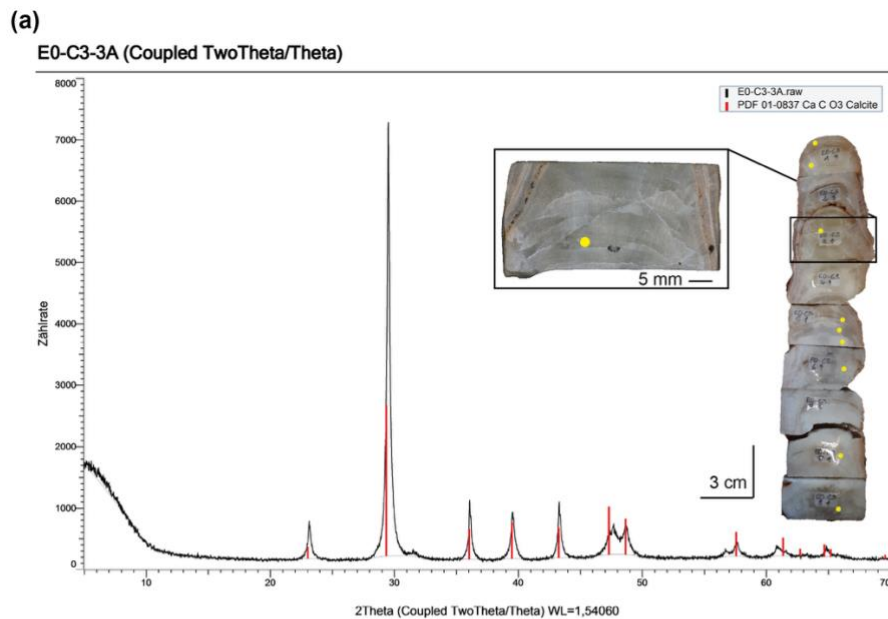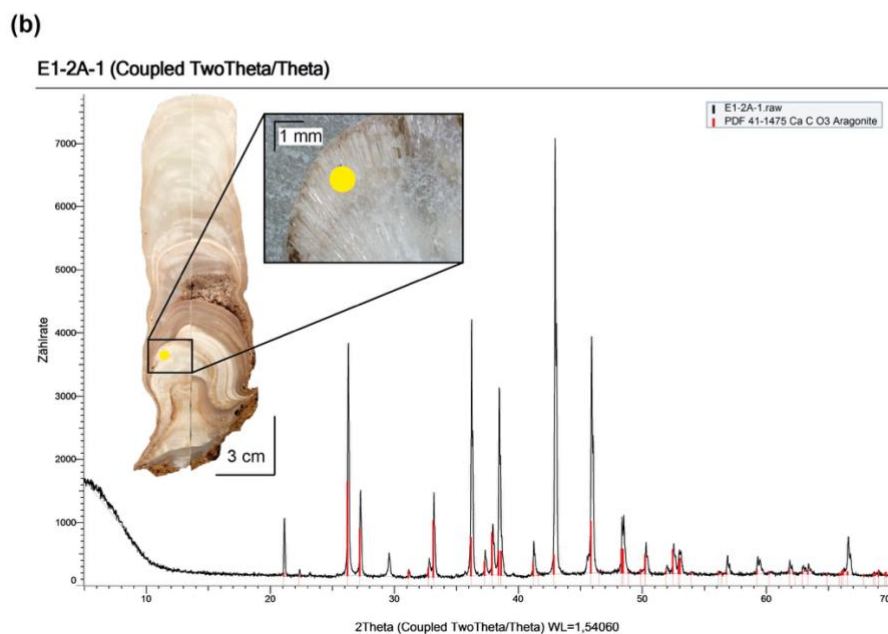

- 120 Figure S 2 (a) X-ray diffraction (XRD) pattern showing the characteristic diffraction peaks ( $2\theta$ ) of calcite for a sample from stalagmite E0-C. The image on the right displays the remaining stalagmite cubes from the thin section preparation, from which sample powder was drilled for XRD analysis (yellow dots). The inset indicates the location of the sample corresponding to the presented diffraction pattern. All eight additional samples analyzed from stalagmite E0-C exhibited the same calcite pattern and are therefore not shown.
- 125 (b) XRD pattern showing the characteristic diffraction peaks ( $2\theta$ ) of aragonite for a sample from the bottom part of stalagmite E1 (yellow dot on the scan). The presence of millimeter-sized needle-like crystals with a silky luster suggested an aragonitic phase, which was confirmed by XRD analysis. Peak positions and intensity data were analyzed using Diffrac.Suite EVA software (Bruker).

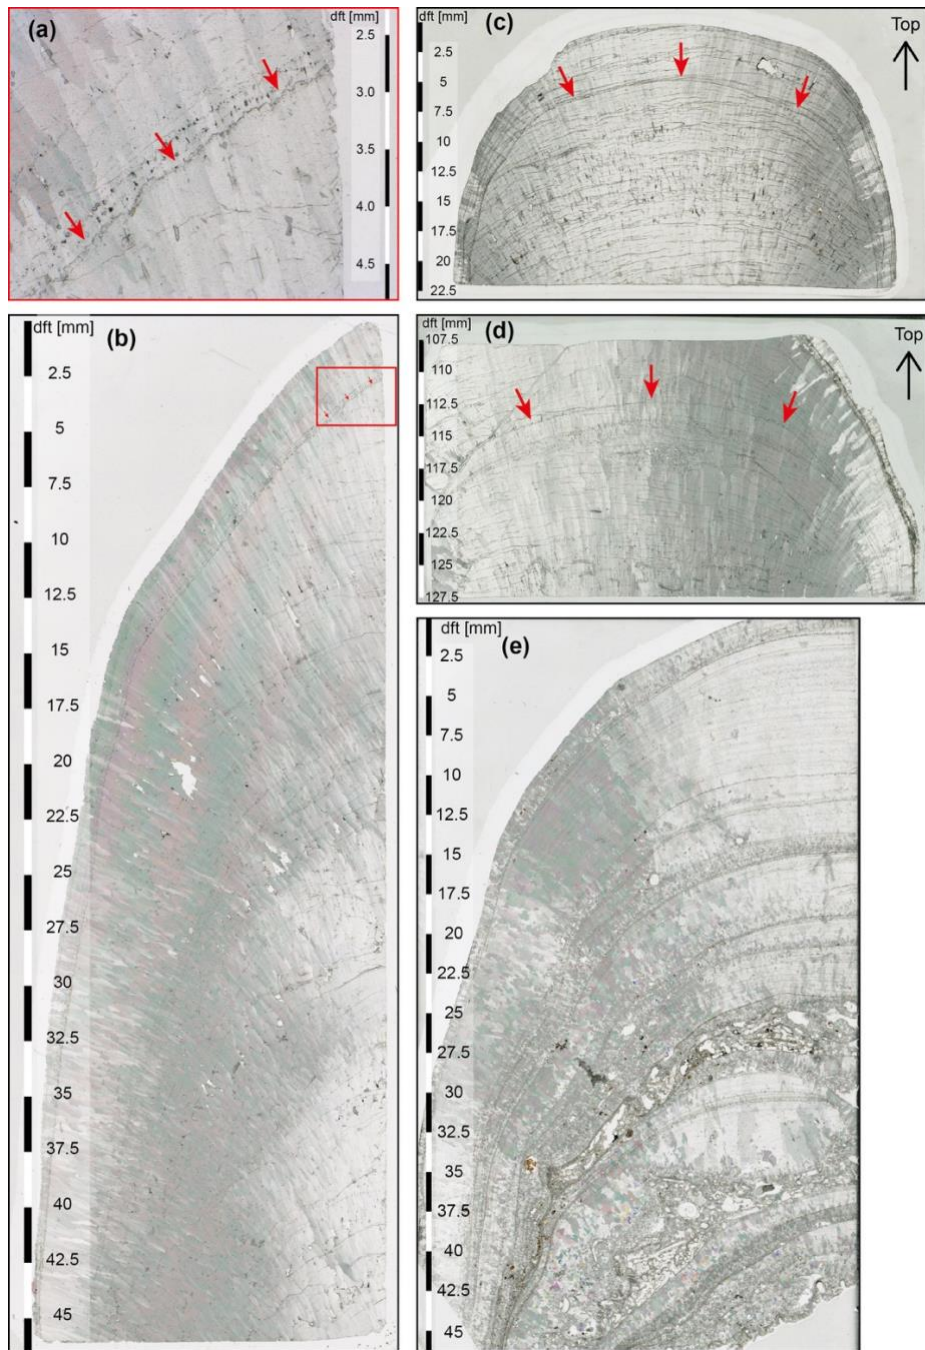

130 Figure S 3 Thin section photographs of stalagmites E0-C, E1 and E4 from Áaktun Kóopo Cave. (a) Zoom-in of the top part of  
 135 stalagmite E1. Red arrows highlight the hiatus at 2.8 mm distance from top (dft). (b) Top part of stalagmite E1, consisting mostly of  
 compact elongated calcite and to some minor extent of open elongated calcite. The red square near the top indicates the zoom-in  
 image shown in (a). (c) Top of stalagmite E0-C consisting of both compact and elongated columnar calcite. Red arrows highlight the  
 hiatus at 5 mm dft. (d) Another hiatus occurring around 113 mm dft in stalagmite E0-C, indicated by rhombohedral crystal  
 terminations (red arrows). (e) Top part of stalagmite E4 showing many growth interruptions as indicated by the layering. Some of  
 these layers consist of detrital material, likely indicating recurrent flooding of the stalagmite.

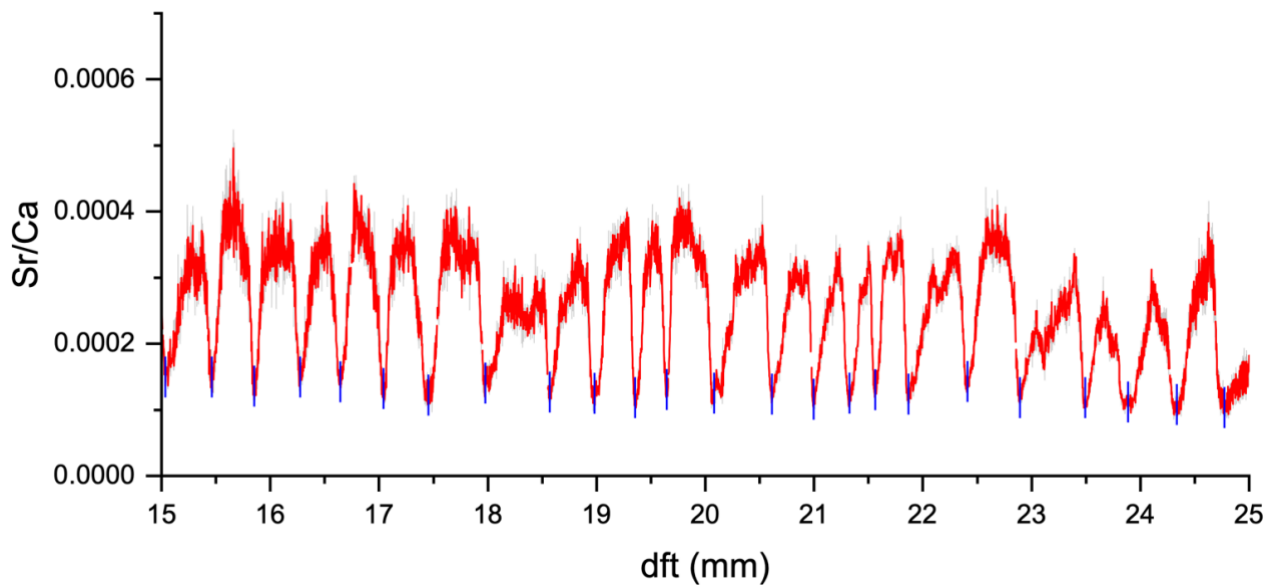

140 Figure S 4 The counting of seasonal Sr/Ca cycles in stalagmites from Áaktun Kóopo Cave is exemplarily shown for the section between 25 and 15 mm dft of stalagmite E23-3. The Sr/Ca ratios are shown in light grey, with a moving average of 30 in red. The counted Sr/Ca minima (blue vertical bars) in this section correspond to  $24 \pm 1$  years, assuming a counting error of 0.5 layers per 10 counted layers. More details to the origin of the seasonal cycles can be found in Schorndorf (2024).

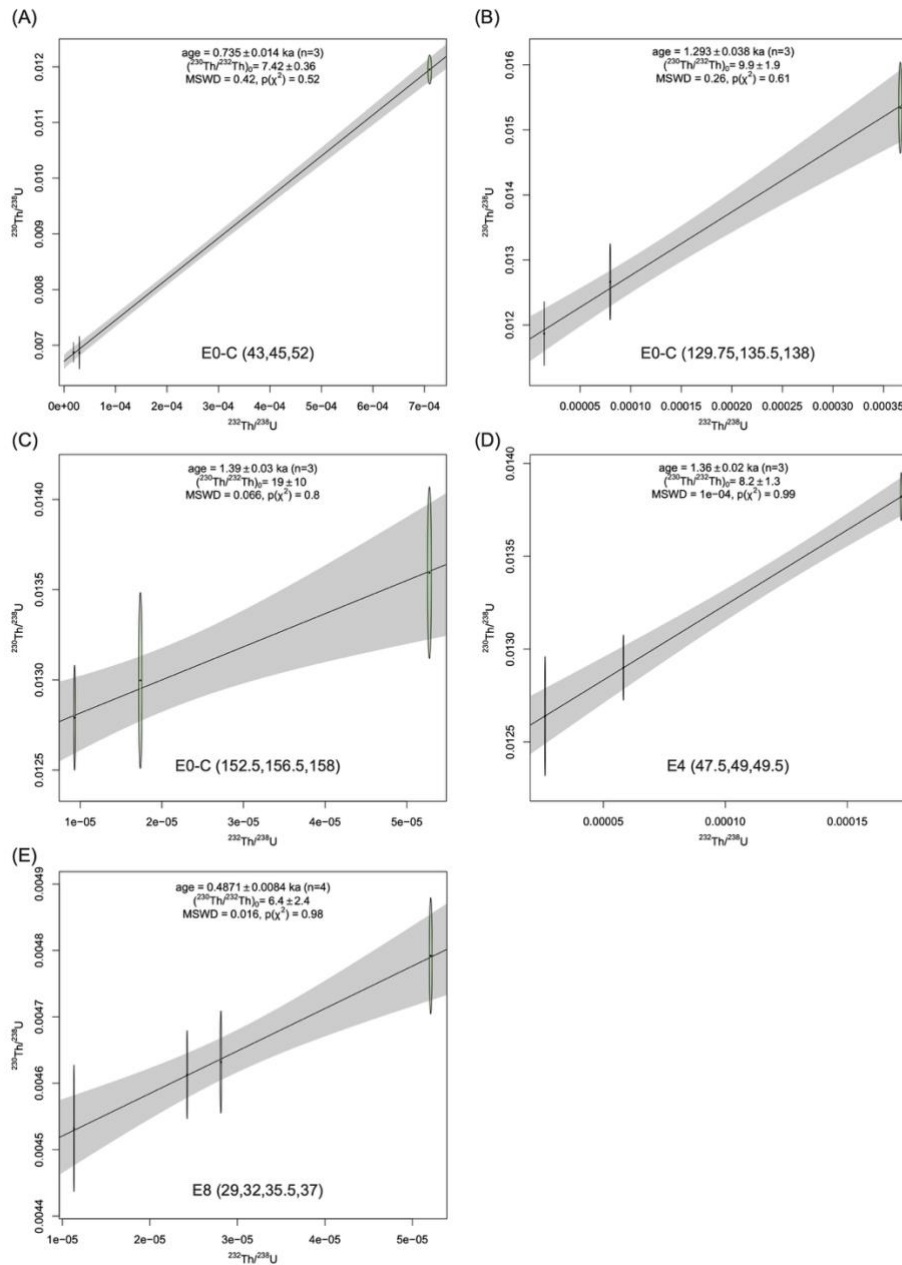

145 **Figure S 5** Five isochrons from three different stalagmites (E0-C, E4, and E8), with fit probabilities >0.05 and mean squared weighted deviation (MSWD) values <1, were derived using ISOPLOT software (Vermeesch, 2018). (a–c) Isochrons from stalagmite E0-C. (d) Isochron from stalagmite E4. (e) Isochron from stalagmite E8. The numbers in brackets next to the stalagmite’s name indicate the distance in millimeters (mm) from the top of the stalagmite of the samples that comprise the individual isochrons.

### S3 Supplementary Tables

**Table S 1 Radiocarbon ( $^{14}\text{C}$ ) measurement results for the tops of stalagmites E0-C, E1, and E8, including a duplicate analysis for E1. Uncertainties in age (yr) and percent modern carbon (pmC) are reported at  $1\sigma$ .**

| MAMS  | Hd lab-nr. | Label    | $^{14}\text{C}$ counts | $^{12}\text{C}$ (ta) | $^{14}\text{C}/^{12}\text{C}$ ( $10^{-12}$ ) | $^{13}\text{C}/^{12}\text{C}$ (%) | pmc   | $\pm$ pmc | $^{14}\text{C}$ age (yr) | $\pm$ (yr) | $\delta^{13}\text{C}$ (‰) |
|-------|------------|----------|------------------------|----------------------|----------------------------------------------|-----------------------------------|-------|-----------|--------------------------|------------|---------------------------|
| 52703 | HD21-111   | E1-Top a | 463833                 | 15.2                 | 1.0345                                       | 1.0488                            | 95.19 | 0.19      | 396                      | 16         | -9.0                      |
| 52704 | HD21-114   | E1-Top b | 490034                 | 16.1                 | 1.0342                                       | 1.0499                            | 94.95 | 0.19      | 416                      | 16         | -8.0                      |
| 52705 | HD21-113   | E0-C-Top | 476207                 | 15.2                 | 1.0598                                       | 1.0487                            | 97.54 | 0.2       | 200                      | 16         | -9.1                      |
| 52706 | HD21-112   | E8-Top   | 485338                 | 15.5                 | 1.062                                        | 1.05                              | 97.49 | 0.2       | 204                      | 16         | -7.9                      |

5

**Table S 2  $^{230}\text{Th}/\text{U}$  dating results of drip water from Áaktun Kóopo Cave. Errors are reported as  $2\sigma$  analytical uncertainties.**

| Sample Label        | Lab. No. | $^{238}\text{U}$ (ng/g) | $\pm 2\sigma$ | $^{232}\text{Th}$ (ng/g) | $\pm 2\sigma$ | $^{230}\text{Th}/^{238}\text{U}$ (Act. Ratio) | $\pm 2\sigma$ | $^{230}\text{Th}/^{232}\text{Th}$ (Act. Ratio) | $\pm 2\sigma$ | $\delta^{234}\text{U}$ (‰) | $\pm 2\sigma$ | uncorr. Age (ka) | $\pm 2\sigma$ |
|---------------------|----------|-------------------------|---------------|--------------------------|---------------|-----------------------------------------------|---------------|------------------------------------------------|---------------|----------------------------|---------------|------------------|---------------|
| MULTIPLE DRIP SITES | 11567    | 3.27463                 | 0.00019       | 0.00046562               | 0.00000082    | 0.000281                                      | 0.000034      | 6.04                                           | 0.74          | 5.66                       | 0.96          | 0.0304           | 0.0037        |
| EDW1                | 11568    | 2.34939                 | 0.00019       | 0.017490                 | 0.000027      | 0.00404                                       | 0.00011       | 1.659                                          | 0.046         | 7.5                        | 2.2           | 0.4382           | 0.012         |
| EDW2                | 11569    | 1.57120                 | 0.00013       | 0.00023727               | 0.00000059    | 0.000443                                      | 0.000050      | 8.9                                            | 1.0           | 12.5                       | 1.7           | 0.0477           | 0.0055        |

10

10

**Table S 3** <sup>230</sup>Th/U data of speleothems from Áaktun Kóopo Cave. Errors are 2σ analytical errors. Corrected <sup>230</sup>Th ages assume variable (<sup>230</sup>Th/<sup>232</sup>Th) activity ratios ranging between 4 and 68. Those ratios have been estimated by using different approaches, such as isochron techniques (i), stratigraphic constrain (s), zero-age carbonate (zac) or layer counting (lc). For samples for which the initial (<sup>230</sup>Th/<sup>232</sup>Th) activity ratio couldn't be estimated, a mean value (m) of 35.5±32.5 was used to account for the high range.

| Sample Label       | Lab. No. | dft (mm) | <sup>238</sup> U (ng/g) | ±2σ   | <sup>232</sup> Th (ng/g) | ±2σ       | <sup>230</sup> Th/ <sup>238</sup> U (Act. Ratio) | ±2σ      | <sup>230</sup> Th/ <sup>232</sup> Th (Act. Ratio) | ±2σ  | δ <sup>234</sup> U (‰) | ±2σ  | uncorr. Age (ka) | ±2σ    | corr.age (ka) | ±2σ   | corr.age (a AD) | ±2σ | δ <sup>234</sup> U <sub>ini</sub> (‰) | ±2σ  | ( <sup>230</sup> Th/ <sup>232</sup> Th) initial | Error | Method |
|--------------------|----------|----------|-------------------------|-------|--------------------------|-----------|--------------------------------------------------|----------|---------------------------------------------------|------|------------------------|------|------------------|--------|---------------|-------|-----------------|-----|---------------------------------------|------|-------------------------------------------------|-------|--------|
| <b>E0-A-49</b>     | 9602     | 49       | 645.397                 | 0.035 | 0.01935                  | 0.00017   | 0.01952                                          | 0.00031  | 1997                                              | 36   | 38.6                   | 1.5  | 2.068            | 0.033  | 2.032         | 0.046 | -14             | 46  | 38.9                                  | 1.5  | 35.5                                            | 32.5  | m      |
| <b>E0-A-8</b>      | 9603     | 8        | 530.436                 | 0.035 | 0.07321                  | 0.0004    | 0.0163                                           | 0.00035  | 362.8                                             | 8    | 38.2                   | 1.6  | 1.725            | 0.037  | 1.56          | 0.16  | 461             | 159 | 38.4                                  | 1.7  | 35.5                                            | 32.5  | m      |
| <b>E0-B-5</b>      | 9553     | 5        | 476.15                  | 0.045 |                          |           | 0.01525                                          | 0.00039  |                                                   |      | 19.3                   | 2.5  | 1.643            | 0.043  | 1.643         | 0.043 | 375             | 43  | 19.4                                  | 2.5  | 35.5                                            | 32.5  | m      |
| <b>E0-B-35</b>     | 11221    | 35       | 529.677                 | 0.084 | 0.0746                   | 0.0012    | 0.01801                                          | 0.00064  | 392                                               | 15   | 18.7                   | 2.3  | 1.945            | 0.072  | 1.73          | 0.14  | 292             | 137 | 18.8                                  | 2.3  | 43.75                                           | 24.25 | s,m    |
| <b>E0-B-59</b>     | 9756     | 59       | 479.457                 | 0.039 | 0.01293                  | 0.00017   | 0.01675                                          | 0.00031  | 1909                                              | 44   | 16.2                   | 1.9  | 1.812            | 0.035  | 1.778         | 0.047 | 240             | 47  | 16.3                                  | 1.9  | 35.5                                            | 32.5  | m      |
| <b>E0-B-85,5</b>   | 10986    | 85.5     | 560.886                 | 0.042 | 0.20982                  | 0.00078   | 0.01977                                          | 0.00029  | 161.3                                             | 2.5  | 16.9                   | 1.7  | 2.141            | 0.032  |               |       |                 |     |                                       |      | 15                                              | 12    | s,m    |
| <b>E0-B-110</b>    | 11222    | 110      | 591.414                 | 0.031 | 0.06447                  | 0.00029   | 0.01943                                          | 0.00019  | 547                                               | 5.8  | 15.3                   | 1.5  | 2.107            | 0.021  | 1.97          | 0.13  | 50              | 131 | 15.4                                  | 1.5  | 35.5                                            | 32.5  | m      |
| <b>E0-B-152</b>    | 9755     | 152      | 655.593                 | 0.061 | 0.28205                  | 0.0008    | 0.02041                                          | 0.00033  | 145.5                                             | 2.4  | 14.6                   | 1.9  | 2.215            | 0.036  |               |       |                 |     |                                       |      | 16                                              | 13    | s,m    |
| <b>EO-B-177</b>    | 10987    | 177      | 601.345                 | 0.047 | 0.19689                  | 0.0006    | 0.02123                                          | 0.00027  | 197.6                                             | 2.6  | 20.4                   | 1.4  | 2.292            | 0.03   |               |       |                 |     |                                       |      | 23.5                                            | 20.5  | s,m    |
| <b>E0-B-212</b>    | 9552     | 212      | 549.821                 | 0.047 | 0.14486                  | 0.00074   | 0.0273                                           | 0.00045  | 317.9                                             | 5.5  | 18.5                   | 3    | 2.962            | 0.05   | 2.63          | 0.31  | -616            | 308 | 18.6                                  | 3    | 35.5                                            | 32.5  | m      |
| <b>EO-C-TOP</b>    | 10521    | 2        | 926.114                 | 0.05  | 1.2732                   | 0.0028    | 0.01338                                          | 0.00015  | 29.73                                             | 0.34 | 19.2                   | 1.2  | 1.441            | 0.016  |               |       |                 |     |                                       |      | 26                                              | 3.7   | s      |
| <b>E0-C-7</b>      | 9555     | 7        | 769.553                 | 0.047 | 0.04864                  | 0.00018   | 0.00326                                          | 0.0001   | 158.1                                             | 4.9  | 13.6                   | 1.2  | 0.352            | 0.011  |               |       |                 |     |                                       |      | 36.5                                            | 31.5  | s,m    |
| <b>EO-C-10,5</b>   | 11232    | 10.5     | 935.652                 | 0.059 | 0.05312                  | 0.00035   | 0.00326                                          | 0.00013  | 175.9                                             | 7    | 11.9                   | 1.1  | 0.352            | 0.014  |               |       |                 |     |                                       |      | 36.25                                           | 31.75 | s,m    |
| <b>EO-C-15,5</b>   | 11233    | 15.5     | 1165.767                | 0.056 | 0.04018                  | 0.00017   | 0.00329                                          | 0.000073 | 293.3                                             | 6.7  | 10.68                  | 0.79 | 0.3556           | 0.0079 | 0.308         | 0.036 | 1713            | 36  | 10.69                                 | 0.79 | 39                                              | 29    | s,m    |
| <b>EO-C-19</b>     | 10973    | 19       | 1186.315                | 0.046 | 0.02106                  | 0.00011   | 0.003113                                         | 0.000064 | 536                                               | 11   | 12.82                  | 0.67 | 0.3357           | 0.0069 | 0.314         | 0.022 | 1708            | 22  | 12.83                                 | 0.67 | 35.5                                            | 32.5  | m      |
| <b>E0-C-20</b>     | 12136    | 20       | 1014.64                 | 0.39  | 0.02751                  | 0.000081  | 0.003377                                         | 0.000037 | 380.6                                             | 4.4  | 13.53                  | 0.38 | 0.3639           | 0.0057 | 0.33          | 0.031 | 1693            | 31  | 13.54                                 | 0.38 | 35.5                                            | 32.5  | m      |
| <b>EO-C-21,5</b>   | 11234    | 21.5     | 832.906                 | 0.044 | 0.10012                  | 0.00027   | 0.004181                                         | 0.000079 | 106.7                                             | 2    | 11.05                  | 0.63 | 0.4519           | 0.0087 |               |       |                 |     |                                       |      | 35.5                                            | 32.5  | m      |
| <b>EO-C-23,5</b>   | 10520    | 23.5     | 804.089                 | 0.053 | 0.05268                  | 0.00018   | 0.005042                                         | 0.000099 | 234.8                                             | 4.7  | 14.4                   | 1.1  | 0.543            | 0.011  | 0.462         | 0.074 | 1559            | 74  | 14.4                                  | 1.1  | 35.5                                            | 32.5  | m      |
| <b>EO-C-24,5</b>   | 11235    | 24.5     | 838.226                 | 0.042 | 0.17535                  | 0.00052   | 0.00608                                          | 0.00013  | 89.4                                              | 2    | 11.7                   | 1.2  | 0.658            | 0.015  |               |       |                 |     |                                       |      | 35.5                                            | 32.5  | m      |
| <b>EO-C-37,5</b>   | 9759     | 37.5     | 1105.866                | 0.073 |                          |           | 0.00507                                          | 0.00014  |                                                   |      | 13.3                   | 1.1  | 0.547            | 0.015  | 0.555         | 0.017 | 1463            | 17  | 13.4                                  | 1.1  | 35.5                                            | 32.5  | m      |
| <b>EO-C-43</b>     | 11236    | 43       | 774.849                 | 0.044 | 1.6817                   | 0.0035    | 0.01195                                          | 0.00011  | 17                                                | 0.2  | 14.9                   | 1.1  | 1.292            | 0.012  |               |       |                 |     |                                       |      | 7.42                                            | 0.36  | i      |
| <b>E0-C-45</b>     | 9758     | 45       | 843.683                 | 0.055 | 0.07688                  | 0.00042   | 0.00687                                          | 0.00012  | 231.6                                             | 4.2  | 11.4                   | 1    | 0.743            | 0.013  | 0.719         | 0.013 | 1299            | 13  | 11.4                                  | 1    | 7.42                                            | 0.36  | i      |
| <b>EO-C-52</b>     | 10974    | 52       | 980.159                 | 0.049 | 0.05544                  | 0.00016   | 0.006874                                         | 0.000073 | 371.4                                             | 4.1  | 10.55                  | 0.85 | 0.7443           | 0.0078 | 0.73          | 0.008 | 1292            | 8   | 10.57                                 | 0.85 | 7.42                                            | 0.36  | i      |
| <b>EO-C-57,5</b>   | 11220    | 57.5     | 1076.86                 | 0.3   | 0.022908                 | 0.00008   | 0.006964                                         | 0.000083 | 1002                                              | 12   | 11.51                  | 0.77 | 0.7533           | 0.009  | 0.727         | 0.026 | 1294            | 26  | 11.54                                 | 0.77 | 35.5                                            | 32.5  | m      |
| <b>EO-C-63</b>     | 10519    | 63       | 1113.238                | 0.066 |                          |           | 0.007233                                         | 0.000076 |                                                   |      | 11.42                  | 0.61 | 0.7826           | 0.0082 | 0.785         | 0.009 | 1235            | 9   | 11.44                                 | 0.61 | 35.5                                            | 32.5  | m      |
| <b>EO-C-69</b>     | 10975    | 69       | 1050.387                | 0.06  | 0.06055                  | 0.00016   | 0.007541                                         | 0.000082 | 399.8                                             | 4.5  | 10.3                   | 0.66 | 0.817            | 0.009  | 0.794         | 0.02  | 1228            | 20  | 10.33                                 | 0.66 | 11.5                                            | 8.5   | s,m    |
| <b>E0-C-69,5</b>   | 12137    | 69.5     | 920.76                  | 0.3   | 0.06441                  | 0.00025   | 0.00831                                          | 0.00012  | 363.3                                             | 5.3  | 12.52                  | 0.67 | 0.898            | 0.013  | 0.811         | 0.085 | 1212            | 85  | 12.55                                 | 0.67 | 35.5                                            | 32.5  | m      |
| <b>EO-C-73</b>     | 11237    | 73       | 933.81                  | 0.043 | 0.05407                  | 0.00016   | 0.008442                                         | 0.000099 | 448.9                                             | 5.5  | 12.77                  | 0.67 | 0.913            | 0.011  | 0.828         | 0.054 | 1193            | 54  | 12.8                                  | 0.67 | 41.5                                            | 26.5  | s,m    |
| <b>E0-C-75</b>     | 11062    | 75       | 922.315                 | 0.044 | 0.06312                  | 0.00027   | 0.008285                                         | 0.000095 | 369.8                                             | 4.5  | 12.92                  | 0.89 | 0.896            | 0.01   | 0.806         | 0.076 | 1215            | 76  | 12.95                                 | 0.9  | 37                                              | 31    | s,m    |
| <b>E0-C-76</b>     | 12138    | 76       | 921.68                  | 0.2   | 0.021804                 | 0.000085  | 0.008253                                         | 0.000084 | 1063                                              | 12   | 12.48                  | 0.42 | 0.893            | 0.01   | 0.86          | 0.026 | 1163            | 26  | 12.51                                 | 0.42 | 39                                              | 29    | s,m    |
| <b>EO-C-77</b>     | 11238    | 77       | 994.05                  | 0.05  | 0.04919                  | 0.0002    | 0.008065                                         | 0.000091 | 498.6                                             | 5.9  | 11.6                   | 1.1  | 0.873            | 0.01   | 0.811         | 0.057 | 1210            | 57  | 11.7                                  | 1.1  | 35.5                                            | 32.5  | m      |
| <b>EO-C-81,5</b>   | 10518    | 81.5     | 1087.077                | 0.068 | 0.00013409               | 0.0000072 | 0.008675                                         | 0.000085 | 213749                                            | 2386 | 12.5                   | 1    | 0.9383           | 0.0093 | 0.938         | 0.009 | 1082            | 9   | 12.5                                  | 1    | 35.5                                            | 32.5  | m      |
| <b>EO-C-84,5</b>   | 11239    | 84.5     | 1231.992                | 0.064 | 0.06069                  | 0.00029   | 0.00885                                          | 0.00013  | 549.9                                             | 8.4  | 12.16                  | 0.82 | 0.957            | 0.014  | 0.875         | 0.037 | 1146            | 37  | 12.19                                 | 0.82 | 47.5                                            | 20.5  | s,m    |
| <b>EO-C-88,5</b>   | 11266    | 88.5     | 1273.923                | 0.072 | 0.015025                 | 0.000091  | 0.00829                                          | 0.00012  | 2168                                              | 34   | 10.2                   | 1.2  | 0.898            | 0.013  | 0.883         | 0.019 | 1138            | 19  | 10.3                                  | 1.2  | 35.5                                            | 32.5  | m      |
| <b>EO-C-92,5</b>   | 10517    | 92.5     | 1323.557                | 0.064 |                          |           | 0.008327                                         | 0.000079 |                                                   |      | 12.94                  | 0.93 | 0.9001           | 0.0085 | 0.904         | 0.009 | 1116            | 9   | 12.97                                 | 0.93 | 35.5                                            | 32.5  | m      |
| <b>EO-C-96,5</b>   | 11267    | 96.5     | 1195.955                | 0.079 | 0.03813                  | 0.00022   | 0.00846                                          | 0.00015  | 817                                               | 15   | 10.2                   | 1.5  | 0.917            | 0.016  | 0.903         | 0.019 | 1118            | 19  | 10.2                                  | 1.5  | 12.5                                            | 9.5   | s,m    |
| <b>EO-C-99,5</b>   | 11063    | 99.5     | 1185.693                | 0.063 | 0.08613                  | 0.0003    | 0.00937                                          | 0.00011  | 393.4                                             | 4.6  | 12                     | 1    | 1.014            | 0.012  | 0.941         | 0.048 | 1080            | 48  | 12                                    | 1    | 28.5                                            | 19    | s      |
| <b>E0-C-100,5</b>  | 12139    | 100.5    | 1041.81                 | 0.23  | 0.013372                 | 0.000048  | 0.009084                                         | 0.000086 | 2160                                              | 22   | 13.25                  | 0.59 | 0.982            | 0.01   | 0.966         | 0.018 | 1057            | 18  | 13.28                                 | 0.59 | 35.5                                            | 32.5  | m      |
| <b>EO-C-102</b>    | 11240    | 102      | 1099.32                 | 0.072 | 0.04319                  | 0.00029   | 0.009                                            | 0.00016  | 703                                               | 13   | 11.2                   | 1.1  | 0.975            | 0.017  | 0.925         | 0.05  | 1096            | 50  | 11.2                                  | 1.1  | 35.5                                            | 32.5  | m      |
| <b>EO-C-105,5</b>  | 10976    | 105.5    | 1131.861                | 0.057 | 0.03114                  | 0.0001    | 0.009367                                         | 0.000079 | 1041.3                                            | 9.4  | 12.27                  | 0.63 | 1.0137           | 0.0085 | 0.979         | 0.033 | 1042            | 33  | 12.31                                 | 0.63 | 35.5                                            | 32.5  | m      |
| <b>EO-C-108,5</b>  | 11241    | 108.5    | 1112.965                | 0.066 | 0.16815                  | 0.00048   | 0.01095                                          | 0.00014  | 222.9                                             | 2.9  | 13.4                   | 1.2  | 1.184            | 0.015  | 1.03          | 0.14  | 990             | 140 | 13.5                                  | 1.2  | 28.75                                           | 25.75 | s,m    |
| <b>EO-C-112</b>    | 11268    | 112      | 1021.202                | 0.066 | 0.09948                  | 0.00054   | 0.01068                                          | 0.00025  | 336.7                                             | 8.1  | 14.9                   | 2.4  | 1.154            | 0.027  | 1.03          | 0.11  | 989             | 114 | 15                                    | 2.4  | 35.5                                            | 32.5  | m      |
| <b>EO-C-113</b>    | 10516    | 113      | 1117.696                | 0.06  | 0.14679                  | 0.00022   | 0.01073                                          | 0.0001   | 249.1                                             | 2.4  | 13.53                  | 0.7  | 1.161            | 0.011  | 1.02          | 0.13  | 1000            | 128 | 13.57                                 | 0.7  | 30.5                                            | 27.5  | s,m    |
| <b>EO-C-115,5</b>  | 11269    | 115.5    | 523.807                 | 0.035 | 0.33368                  | 0.00078   | 0.01689                                          | 0.00025  | 81.6                                              | 1.2  | 17.5                   | 1.7  | 1.825            | 0.028  |               |       |                 |     |                                       |      | 33.25                                           | 8.25  | s      |
| <b>EO-C-116,75</b> | 11270    | 116.75   | 490.803                 | 0.028 | 0.09853                  | 0.00034   | 0.0115                                           | 0.00026  | 176.8                                             | 4    | 16.3                   | 2    | 1.241            | 0.028  |               |       |                 |     |                                       |      | 26                                              | 23    | s,m    |

| SAMPLE LABEL | Lab. No. | dft (mm) | <sup>238</sup> U (ng/g) | ±2σ   | <sup>232</sup> Th (ng/g) | ±2σ      | <sup>230</sup> Th/ <sup>238</sup> U (act. Ratio) | ±2σ      | <sup>230</sup> Th/ <sup>232</sup> Th (act. Ratio) | ±2σ | δ <sup>234</sup> U (‰) | ±2σ  | uncorr. Age (ka) | ±2σ    | corr.age (ka) | ±2σ    | corr.age (a ad) | ±2σ | δ <sup>234</sup> U <sub>ini</sub> (‰) | ±2σ  | ( <sup>230</sup> Th/ <sup>232</sup> Th) initial | Error | Method |
|--------------|----------|----------|-------------------------|-------|--------------------------|----------|--------------------------------------------------|----------|---------------------------------------------------|-----|------------------------|------|------------------|--------|---------------|--------|-----------------|-----|---------------------------------------|------|-------------------------------------------------|-------|--------|
| EO-C-117     | 10977    | 117      | 526.817                 | 0.032 | 0.9144                   | 0.0024   | 0.01455                                          | 0.00032  | 25.6                                              | 0.6 | 16.1                   | 1.7  | 1.572            | 0.035  |               |        |                 |     |                                       |      | 8                                               | 3     | s,m    |
| EO-C-119,5   | 11271    | 119.5    | 481.611                 | 0.025 | 0.02899                  | 0.00016  | 0.01225                                          | 0.00018  | 626.7                                             | 9.8 | 14.1                   | 1.3  | 1.325            | 0.02   | 1.224         | 0.049  | 797             | 49  | 14.2                                  | 1.3  | 47.5                                            | 20.5  | s,m    |
| E0-C-120     | 9757     | 120      | 410.434                 | 0.036 | 0.01817                  | 0.00018  | 0.01137                                          | 0.00033  | 790                                               | 24  | 15.5                   | 2.2  | 1.228            | 0.037  | 1.173         | 0.065  | 845             | 65  | 15.5                                  | 2.2  | 35.5                                            | 32.5  | m      |
| EO-C-120,75  | 12140    | 120.75   | 416.21                  | 0.12  | 0.03035                  | 0.00012  | 0.01276                                          | 0.00021  | 529.3                                             | 8.9 | 16.6                   | 1    | 1.377            | 0.023  | 1.265         | 0.065  | 758             | 65  | 16.6                                  | 1    | 44                                              | 24    | s,m    |
| EO-C-122     | 11272    | 122      | 354.898                 | 0.022 | 0.02883                  | 0.00014  | 0.01249                                          | 0.0002   | 471.5                                             | 7.8 | 12.5                   | 1.9  | 1.354            | 0.022  | 1.241         | 0.087  | 780             | 87  | 12.5                                  | 1.9  | 39.25                                           | 28.75 | s,m    |
| E0-C-122     | 12141    | 122      | 366.19                  | 0.18  | 0.03441                  | 0.00015  | 0.01315                                          | 0.00031  | 424                                               | 10  | 14.8                   | 1.8  | 1.423            | 0.034  | 1.261         | 0.073  | 762             | 73  | 14.8                                  | 1.8  | 48.75                                           | 19.25 | s,m    |
| EO-C-124,75  | 12142    | 124.75   | 550.69                  | 0.15  | 0.02739                  | 0.00013  | 0.01215                                          | 0.00016  | 747                                               | 10  | 18.3                   | 1.3  | 1.309            | 0.017  | 1.247         | 0.057  | 776             | 57  | 18.3                                  | 1.3  | 35.5                                            | 32.5  | m      |
| EO-C-129,75  | 11273    | 129.75   | 636.94                  | 0.04  | 0.02816                  | 0.00011  | 0.01187                                          | 0.0002   | 823                                               | 14  | 11.8                   | 1.8  | 1.287            | 0.022  | 1.271         | 0.022  | 750             | 22  | 11.9                                  | 1.8  | 9.9                                             | 1.9   | i      |
| E0-C-135,5   | 12143    | 135.5    | 587.65                  | 0.23  | 0.14321                  | 0.00041  | 0.01266                                          | 0.00024  | 159.7                                             | 3.1 | 16.8                   | 1.5  | 1.366            | 0.026  |               |        |                 |     |                                       |      | 9.9                                             | 1.9   | i      |
| E0-C-138     | 12144    | 138      | 528.94                  | 0.2   | 0.5926                   | 0.0011   | 0.01534                                          | 0.00029  | 42.1                                              | 0.8 | 16.6                   | 1.2  | 1.658            | 0.032  |               |        |                 |     |                                       |      | 9.9                                             | 1.9   | i      |
| EO-C-152,5   | 11274    | 152.5    | 572.494                 | 0.026 | 0.01628                  | 0.000079 | 0.01279                                          | 0.00012  | 1380                                              | 14  | 14.2                   | 1.2  | 1.384            | 0.013  | 1.365         | 0.017  | 656             | 17  | 14.2                                  | 1.2  | 19                                              | 10    | i      |
| E0-C-156,5   | 12145    | 156.5    | 560.93                  | 0.16  | 0.09047                  | 0.00018  | 0.01359                                          | 0.00019  | 259.2                                             | 3.7 | 16.15                  | 0.92 | 1.469            | 0.021  | 1.361         | 0.06   | 662             | 60  | 16.21                                 | 0.92 | 19                                              | 10    | i      |
| EO-C-158     | 11275    | 158      | 598.252                 | 0.036 | 0.03174                  | 0.00016  | 0.013                                            | 0.0002   | 752                                               | 12  | 15.5                   | 1.5  | 1.405            | 0.022  | 1.369         | 0.029  | 652             | 29  | 15.5                                  | 1.5  | 19                                              | 10    | i      |
| EO-C-162,5   | 10978    | 162.5    | 632.411                 | 0.032 | 0.04017                  | 0.00011  | 0.0133                                           | 0.00016  | 641.2                                             | 8.1 | 16.8                   | 1.2  | 1.435            | 0.018  | 1.356         | 0.075  | 665             | 75  | 16.9                                  | 1.2  | 35.5                                            | 32.5  | m      |
| E0-C-166     | 11064    | 166      | 371.477                 | 0.02  | 0.05432                  | 0.00021  | 0.01499                                          | 0.00022  | 312.5                                             | 4.8 | 18                     | 2.1  | 1.618            | 0.024  | 1.44          | 0.17   | 586             | 165 | 18                                    | 2.1  | 35.5                                            | 32.5  | m      |
| E0-C-200     | 9554     | 200      | 544.975                 | 0.045 | 0.10513                  | 0.00051  | 0.01585                                          | 0.00029  | 251.4                                             | 4.8 | 17.4                   | 1.9  | 1.712            | 0.032  | 1.47          | 0.22   | 547             | 220 | 17.5                                  | 1.9  | 35.5                                            | 32.5  | m      |
| E1-TOP       | 10979    | 1        | 1771.328                | 0.089 | 0.51392                  | 0.0009   | 0.005344                                         | 0.000057 | 56.5                                              | 0.6 | 9.23                   | 0.63 | 0.5789           | 0.0061 |               |        |                 |     |                                       |      | 52.1                                            | 4.1   | s      |
| E1-3,5       | 11223    | 3.5      | 1836.087                | 0.078 | 0.07911                  | 0.00025  | 0.000765                                         | 0.000038 | 54.5                                              | 2.7 | 8.11                   | 0.84 | 0.0828           | 0.0041 |               |        |                 |     |                                       |      | 27                                              | 24    | s,m    |
| E1-7         | 11224    | 7        | 1743.306                | 0.097 | 0.07268                  | 0.00023  | 0.001802                                         | 0.000037 | 132.3                                             | 2.8 | 8.49                   | 0.61 | 0.195            | 0.0041 |               |        |                 |     |                                       |      | 51                                              | 17    | s,m    |
| E1 - 11      | 11946    | 11       | 2237.344                | 0.088 | 0.02562                  | 0.00011  | 0.00132                                          | 0.000025 | 350.9                                             | 6.9 | 10.01                  | 0.66 | 0.1426           | 0.0039 | 0.128         | 0.013  | 1895            | 13  | 10.01                                 | 0.66 | 35.5                                            | 32.5  | m      |
| E1 - 16      | 11947    | 16       | 1551.859                | 0.055 | 0.11735                  | 0.00037  | 0.002977                                         | 0.000046 | 120.2                                             | 1.9 | 10.22                  | 0.63 | 0.3218           | 0.0053 |               |        |                 |     |                                       |      | 50                                              | 18    | s,m    |
| E1-22        | 11225    | 22       | 1797.401                | 0.091 | 0.017469                 | 0.000063 | 0.00217                                          | 0.000041 | 681                                               | 13  | 10.62                  | 0.62 | 0.2343           | 0.0044 | 0.222         | 0.012  | 1799            | 12  | 10.63                                 | 0.62 | 35.5                                            | 32.5  | m      |
| E1 - 26,5    | 11948    | 26.5     | 1543.853                | 0.055 | 0.03103                  | 0.0001   | 0.002362                                         | 0.000045 | 361.8                                             | 7   | 13.87                  | 0.65 | 0.2544           | 0.0067 | 0.229         | 0.024  | 1794            | 24  | 13.88                                 | 0.65 | 35.5                                            | 32.5  | m      |
| E1 - 31      | 11949    | 31       | 1930.797                | 0.049 | 0.03077                  | 0.00012  | 0.002563                                         | 0.00004  | 493.9                                             | 7.9 | 15.09                  | 0.58 | 0.2757           | 0.0059 | 0.256         | 0.019  | 1767            | 19  | 15.1                                  | 0.58 | 35.5                                            | 32.5  | m      |
| E1-35        | 11058    | 35       | 1473.198                | 0.075 | 0.017711                 | 0.000075 | 0.002671                                         | 0.000045 | 679                                               | 12  | 12.47                  | 0.67 | 0.288            | 0.0049 | 0.267         | 0.009  | 1754            | 9   | 12.48                                 | 0.67 | 49                                              | 19    | s,m    |
| E1 - 39      | 11950    | 39       | 1745.56                 | 0.077 |                          |          | 0.002577                                         | 0.000051 |                                                   |     | 14.7                   | 0.9  | 0.2773           | 0.0059 | 0.2773        | 0.0059 | 1746            | 6   | 14.7                                  | 0.9  |                                                 |       |        |
| E1 - 44      | 11951    | 44       | 1728.205                | 0.06  | 0.09521                  | 0.00033  | 0.003532                                         | 0.000046 | 197.6                                             | 2.7 | 13.11                  | 0.56 | 0.3808           | 0.0051 |               |        |                 |     |                                       |      | 38.5                                            | 14.5  | s      |
| E1-48,5      | 11226    | 48.5     | 1726.966                | 0.083 | 0.014962                 | 0.000064 | 0.003087                                         | 0.000042 | 1087                                              | 16  | 12.61                  | 0.5  | 0.333            | 0.0046 | 0.322         | 0.011  | 1699            | 11  | 12.63                                 | 0.5  | 35.5                                            | 32.5  | m      |
| E1 - 54      | 11952    | 54       | 1715.401                | 0.08  | 0.05117                  | 0.00015  | 0.003389                                         | 0.000043 | 350                                               | 4.5 | 14.25                  | 0.82 | 0.3649           | 0.0066 | 0.328         | 0.034  | 1695            | 34  | 14.26                                 | 0.82 | 35.5                                            | 32.5  | m      |
| E1-59,5      | 10980    | 59.5     | 1523.231                | 0.082 | 0.05646                  | 0.00013  | 0.003989                                         | 0.000042 | 329.3                                             | 3.5 | 17.06                  | 0.49 | 0.4285           | 0.0046 | 0.382         | 0.043  | 1639            | 43  | 17.08                                 | 0.49 | 35.5                                            | 32.5  | m      |
| E1-62        | 11059    | 62       | 1313.74                 | 0.58  | 0.2305                   | 0.0022   | 0.00555                                          | 0.00015  | 96.8                                              | 2.7 | 15.95                  | 0.95 | 0.597            | 0.016  |               |        |                 |     |                                       |      | 35.75                                           | 16.25 | s      |
| E1-63,5      | 11674    | 63.5     | 1354.252                | 0.055 | 0.23936                  | 0.00027  | 0.004845                                         | 0.000053 | 84.1                                              | 0.9 | 16.03                  | 0.41 | 0.5213           | 0.0057 |               |        |                 |     |                                       |      | 23.25                                           | 16.25 | s      |
| E1 - 70      | 11953    | 70       | 1242.043                | 0.079 | 0.17828                  | 0.00051  | 0.004473                                         | 0.000065 | 95.9                                              | 1.4 | 17.71                  | 0.85 | 0.4803           | 0.0071 |               |        |                 |     |                                       |      | 21.5                                            | 18.5  | s,m    |
| E1-73,5      | 11227    | 73.5     | 1735.97                 | 0.088 | 0.03627                  | 0.00015  | 0.004784                                         | 0.00006  | 698                                               | 9.3 | 12.19                  | 0.57 | 0.5166           | 0.0065 | 0.491         | 0.025  | 1531            | 25  | 12.2                                  | 0.57 | 35.5                                            | 32.5  | m      |
| E1-75        | 11060    | 75       | 1202.21                 | 0.061 | 0.14117                  | 0.00039  | 0.007591                                         | 0.000087 | 198.3                                             | 2.3 | 14.89                  | 0.93 | 0.819            | 0.01   |               |        |                 |     |                                       |      | 68                                              | 0     | s      |
| E1-78,5      | 11061    | 78.5     | 1512.197                | 0.095 | 0.2912                   | 0.0011   | 0.00765                                          | 0.00019  | 122                                               | 3.1 | 13.4                   | 1.2  | 0.827            | 0.021  |               |        |                 |     |                                       |      | 55.25                                           | 12.75 | s,m    |
| E1-80,5      | 11675    | 80.5     | 1434.68                 | 0.046 | 0.11122                  | 0.00014  | 0.005014                                         | 0.000043 | 198.3                                             | 1.7 | 14.43                  | 0.4  | 0.5403           | 0.0046 |               |        |                 |     |                                       |      | 35.5                                            | 32.5  | m      |
| E1 - 84      | 11954    | 84       | 1541.23                 | 0.065 | 0.03422                  | 0.0002   | 0.00514                                          | 0.00013  | 714                                               | 18  | 17.58                  | 0.71 | 0.552            | 0.014  | 0.525         | 0.029  | 1498            | 29  | 17.6                                  | 0.71 | 35.5                                            | 32.5  | m      |
| E1 - 87      | 11955    | 87       | 1515.484                | 0.076 | 0.18074                  | 0.00061  | 0.00702                                          | 0.00017  | 181.7                                             | 4.5 | 15.28                  | 0.69 | 0.756            | 0.02   |               |        |                 |     |                                       |      | 54                                              | 14    | s,m    |
| E1-90,5      | 11228    | 90.5     | 1621.764                | 0.089 | 0.06072                  | 0.00023  | 0.005437                                         | 0.000056 | 443.5                                             | 4.9 | 14.58                  | 0.66 | 0.5859           | 0.0061 | 0.539         | 0.043  | 1482            | 43  | 14.6                                  | 0.66 | 35.5                                            | 32.5  | m      |
| E1-92        | 10981    | 92       | 1695.43                 | 0.1   | 0.03719                  | 0.00012  | 0.005474                                         | 0.000061 | 764.8                                             | 8.8 | 18.04                  | 0.58 | 0.5879           | 0.0065 | 0.561         | 0.026  | 1460            | 26  | 18.07                                 | 0.58 | 35.5                                            | 32.5  | m      |
| E2-6         | 9629     | 6        | 762.897                 | 0.072 | 0.09972                  | 0.00059  | 0.00099                                          | 0.00014  | 23.3                                              | 3.3 | 10.6                   | 1.5  | 0.107            | 0.015  |               |        |                 |     |                                       |      | 35.5                                            | 32.5  | m      |
| E2-262,5     | 9628     | 262.5    | 509.779                 | 0.044 | 0.17169                  | 0.00059  | 0.02049                                          | 0.00034  | 186.6                                             | 3.1 | 7.4                    | 2.2  | 2.241            | 0.037  |               |        |                 |     |                                       |      | 35.5                                            | 32.5  | m      |
| E3-5,5       | 9631     | 5.5      | 970.698                 | 0.076 | 0.26381                  | 0.00074  | 0.00137                                          | 0.00011  | 15.5                                              | 1.3 | 7.2                    | 1.6  | 0.149            | 0.012  |               |        |                 |     |                                       |      | 9.2                                             | 6.2   | s,m    |
| E3-2B-22     | 12146    | 22       | 633.16                  | 0.15  | 0.33474                  | 0.00071  | 0.002339                                         | 0.000054 | 13.6                                              | 0.3 | 8.23                   | 0.66 | 0.2532           | 0.0068 |               |        |                 |     |                                       |      | 8.1                                             | 5.1   | s,m    |
| E3-2B-70     | 12147    | 70       | 575.55                  | 0.17  | 0.025897                 | 0.000091 | 0.005241                                         | 0.00009  | 356.8                                             | 6.2 | 5.01                   | 0.74 | 0.57             | 0.01   | 0.513         | 0.054  | 1510            | 54  | 5.01                                  | 0.74 | 35.5                                            | 32.5  | m      |
| E3-2B-130    | 12148    | 130      | 325.44                  | 0.24  | 0.012097                 | 0.000081 | 0.01255                                          | 0.0003   | 1028                                              | 25  | 9.1                    | 1.6  | 1.365            | 0.033  | 1.318         | 0.053  | 705             | 53  | 9.1                                   | 1.6  | 35.5                                            | 32.5  | m      |
| E3-2B-155    | 12149    | 155      | 440.53                  | 0.24  | 0.09521                  | 0.00031  | 0.01379                                          | 0.00017  | 193.2                                             | 2.5 | 10.7                   | 0.94 | 1.498            | 0.018  |               |        |                 |     |                                       |      | 35.5                                            | 32.5  | m      |
| E3-215       | 9630     | 215      | 331.193                 | 0.042 | 0.06848                  | 0.00068  | 0.02208                                          | 0.00063  | 328                                               | 10  | 17.8                   | 4.1  | 2.391            | 0.07   | 2.13          | 0.25   | -116            | 247 | 17.9                                  | 4.1  | 35.5                                            | 32.5  | m      |

| SAMPLE LABEL | Lab. No. | dft (mm) | <sup>238</sup> U (ng/g) | ±2σ   | <sup>232</sup> Th (ng/g) | ±2σ      | <sup>230</sup> Th/ <sup>238</sup> U (act. Ratio) | ±2σ      | <sup>230</sup> Th/ <sup>232</sup> Th (act. Ratio) | ±2σ    | δ <sup>234</sup> U (‰) | ±2σ  | uncorr. Age (ka) | ±2σ    | corr.age (ka) | ±2σ   | corr.age (a ad) | ±2σ   | δ <sup>234</sup> U <sub>ini</sub> (‰) | ±2σ  | ( <sup>230</sup> Th/ <sup>232</sup> Th) initial | Error | Method |
|--------------|----------|----------|-------------------------|-------|--------------------------|----------|--------------------------------------------------|----------|---------------------------------------------------|--------|------------------------|------|------------------|--------|---------------|-------|-----------------|-------|---------------------------------------|------|-------------------------------------------------|-------|--------|
| E4-TOP       | 11051    | 1        | 1126.134                | 0.061 | 8.657                    | 0.018    | 0.02142                                          | 0.00017  | 8.53                                              | 0.07   | 8.2                    | 1.1  | 2.342            | 0.019  |               |       |                 |       |                                       |      | 7.3                                             | 1.2   | s      |
| E4-4,5       | 11141    | 4.5      | 1065.393                | 0.077 | 0.8496                   | 0.0025   | 0.007237                                         | 0.000087 | 27.74                                             | 0.34   | 9.4                    | 1    | 0.785            | 0.01   |               |       |                 |       |                                       |      | 15.9                                            | 11.7  | s      |
| E4-6         | 9550     | 6        | 1140.565                | 0.067 | 2.0224                   | 0.0046   | 0.0094                                           | 0.00016  | 16.23                                             | 0.28   | 7.63                   | 0.86 | 1.022            | 0.018  |               |       |                 |       |                                       |      | 10.9                                            | 5.2   | s      |
| E4-7,5       | 11142    | 7.5      | 1237.376                | 0.072 | 0.09626                  | 0.00022  | 0.006081                                         | 0.000065 | 239                                               | 2.6    | 8.49                   | 0.77 | 0.6595           | 0.0071 | 0.562         | 0.088 | 1459            | 88    | 8.5                                   | 0.77 | 35.5                                            | 32.5  | m      |
| E4-9         | 11143    | 9        | 1254.572                | 0.06  | 0.11964                  | 0.00025  | 0.006362                                         | 0.000081 | 204.2                                             | 2.6    | 7.7                    | 1    | 0.6906           | 0.009  | 0.57          | 0.11  | 1450            | 108   | 7.7                                   | 1    | 35.5                                            | 32.5  | m      |
| E4-10        | 11052    | 10       | 1153.243                | 0.076 | 2.2986                   | 0.0042   | 0.01109                                          | 0.00011  | 17.01                                             | 0.18   | 8.27                   | 0.89 | 1.206            | 0.013  |               |       |                 |       |                                       |      | 10                                              | 6.5   | s      |
| E4-11,5      | 11144    | 11.5     | 1130.282                | 0.068 | 4.456                    | 0.012    | 0.01418                                          | 0.00016  | 11.03                                             | 0.13   | 10.4                   | 1    | 1.541            | 0.018  |               |       |                 |       |                                       |      | 7.65                                            | 3.3   | s      |
| E4-13        | 11145    | 13       | 1202.259                | 0.092 | 1.0409                   | 0.0025   | 0.00861                                          | 0.00012  | 30.51                                             | 0.44   | 12.5                   | 1.6  | 0.931            | 0.014  |               |       |                 |       |                                       |      | 9.15                                            | 6.15  | s,m    |
| E4-15        | 11146    | 15       | 1365.197                | 0.079 | 26.473                   | 0.059    | 0.05088                                          | 0.00024  | 8.065                                             | 0.042  | 11.23                  | 0.81 | 5.629            | 0.027  |               |       |                 |       |                                       |      | 7.36                                            | 0.64  | s      |
| E4-16        | 11147    | 16       | 1473.913                | 0.079 | 2.7839                   | 0.0056   | 0.012427                                         | 0.000097 | 20.2                                              | 0.16   | 6.54                   | 0.68 | 1.355            | 0.011  |               |       |                 |       |                                       |      | 13.15                                           | 6.85  | s      |
| E4-18        | 10982    | 18       | 1740.17                 | 0.11  | 0.32014                  | 0.00065  | 0.0085                                           | 0.000095 | 141.6                                             | 1.6    | 7.03                   | 0.63 | 0.924            | 0.011  |               |       |                 |       |                                       |      | 35.5                                            | 32.5  | m      |
| E4-19,5      | 11152    | 19.5     | 1645.78                 | 0.1   | 15.62                    | 0.046    | 0.0313                                           | 0.00019  | 10.095                                            | 0.067  | 9.46                   | 0.81 | 3.435            | 0.021  |               |       |                 |       |                                       |      | 7.45                                            | 1.3   | s      |
| E4-20,5      | 11153    | 20.5     | 1326.155                | 0.062 | 3.5764                   | 0.0088   | 0.015155                                         | 0.000099 | 17.21                                             | 0.12   | 8.9                    | 0.81 | 1.65             | 0.011  |               |       |                 |       |                                       |      | 7.8                                             | 4.7   | s      |
| E4-21,5      | 11154    | 21.5     | 997.112                 | 0.055 | 9.369                    | 0.022    | 0.0318                                           | 0.00016  | 10.328                                            | 0.057  | 8.62                   | 0.77 | 3.493            | 0.018  |               |       |                 |       |                                       |      | 7.7                                             | 1.3   | s      |
| E4-23        | 11155    | 23       | 869.915                 | 0.041 | 3.7221                   | 0.0092   | 0.01734                                          | 0.00014  | 12.4                                              | 0.11   | 7.4                    | 1.1  | 1.893            | 0.016  |               |       |                 |       |                                       |      | 6.5                                             | 2.9   | s      |
| E4-24,5      | 11156    | 24.5     | 885.362                 | 0.052 | 7.593                    | 0.019    | 0.03917                                          | 0.00024  | 13.99                                             | 0.092  | 8.9                    | 1.1  | 4.318            | 0.027  |               |       |                 |       |                                       |      | 11                                              | 1.5   | s      |
| E4-25,5      | 11157    | 25.5     | 740.474                 | 0.038 | 1.8107                   | 0.0033   | 0.01629                                          | 0.00015  | 20.41                                             | 0.19   | 8.5                    | 1    | 1.776            | 0.016  |               |       |                 |       |                                       |      | 10                                              | 5.1   | s      |
| E4-28        | 10983    | 28       | 853.239                 | 0.055 | 1.3851                   | 0.0022   | 0.01227                                          | 0.00014  | 23.17                                             | 0.27   | 9                      | 1.2  | 1.334            | 0.016  |               |       |                 |       |                                       |      | 9.1                                             | 6.1   | s,m    |
| E4-29,5      | 11158    | 29.5     | 823.449                 | 0.034 | 0.8976                   | 0.0023   | 0.01432                                          | 0.00013  | 40.12                                             | 0.39   | 8.15                   | 0.69 | 1.56             | 0.015  |               |       |                 |       |                                       |      | 16.5                                            | 11.8  | s      |
| E4-37        | 11053    | 37       | 744.671                 | 0.032 | 1.1892                   | 0.003    | 0.01494                                          | 0.00015  | 28.59                                             | 0.3    | 5.9                    | 0.9  | 1.631            | 0.017  |               |       |                 |       |                                       |      | 12.5                                            | 8.1   | s      |
| E4-40        | 11054    | 40       | 659.002                 | 0.036 | 1.1814                   | 0.0021   | 0.01697                                          | 0.00014  | 28.94                                             | 0.24   | 6.7                    | 1    | 1.853            | 0.015  |               |       |                 |       |                                       |      | 14.6                                            | 7.2   | s      |
| E4-42        | 11148    | 42       | 623.639                 | 0.033 | 1.3714                   | 0.0026   | 0.02015                                          | 0.00017  | 28.07                                             | 0.25   | 7.1                    | 1.3  | 2.204            | 0.019  |               |       |                 |       |                                       |      | 16.3                                            | 5.8   | s      |
| E4-43,5      | 11149    | 43.5     | 666.473                 | 0.04  | 0.4339                   | 0.0011   | 0.01411                                          | 0.00014  | 66.58                                             | 0.67   | 9                      | 1.2  | 1.536            | 0.015  |               |       |                 |       |                                       |      | 26.6                                            | 19.9  | s      |
| E4-44,5      | 11150    | 44.5     | 604.009                 | 0.039 | 0.12745                  | 0.00029  | 0.01301                                          | 0.00011  | 189.6                                             | 1.7    | 5.2                    | 1.4  | 1.421            | 0.012  |               |       |                 |       |                                       |      | 36.5                                            | 31.5  | s,m    |
| E4-46        | 11161    | 46       | 659.711                 | 0.029 | 0.2563                   | 0.00057  | 0.01376                                          | 0.00013  | 107.8                                             | 1.1    | 5.1                    | 1.1  | 1.503            | 0.015  |               |       |                 |       |                                       |      | 26                                              | 17    | s      |
| E4-47,5      | 11160    | 47.5     | 635.883                 | 0.024 | 0.33454                  | 0.00067  | 0.01382                                          | 0.0001   | 80.42                                             | 0.63   | 6.43                   | 0.89 | 1.508            | 0.012  |               |       |                 |       |                                       |      | 8.2                                             | 1.3   | i      |
| E4-49        | 11159    | 49       | 715.499                 | 0.04  | 0.12728                  | 0.00031  | 0.0129                                           | 0.00014  | 221.8                                             | 2.5    | 8                      | 1.2  | 1.405            | 0.016  | 1.353         | 0.018 | 668             | 18    | 8                                     | 1.2  | 8.2                                             | 1.3   | i      |
| E4-49,5      | 9551     | 49.5     | 671.6                   | 0.054 | 0.05352                  | 0.00033  | 0.01264                                          | 0.00026  | 487                                               | 10     | 10.4                   | 1.5  | 1.373            | 0.028  | 1.349         | 0.028 | 669             | 28    | 10.5                                  | 1.5  | 8.2                                             | 1.3   | i      |
| EMW5-28,5    | 9686     | 28.5     | 377.813                 | 0.035 | 0.17431                  | 0.00056  | 0.018491                                         | 0.000376 | 123.4                                             | 2.5    | 11.8                   | 2.2  | 2.011            | 0.041  |               |       |                 |       |                                       |      | 35.5                                            | 32.5  | m      |
| E6-7,5       | 9752     | 7.5      | 877.39                  | 0.39  |                          |          | 0.912812                                         | 0.003365 |                                                   |        | 1.3                    | 2.7  | 264.1            | 5.7    | 264.1         | 5.9   | -262120         | 5918  | 2.8                                   | 5.8  | 35.5                                            | 32.5  | m      |
| E6-31,5      | 9751     | 31.5     | 106.054                 | 0.071 | 0.0031                   | 0.0092   | 0.979097                                         | 0.013033 | 101624                                            | 295396 | 86                     | 33   | 234              | 41     | 234           | 44    | -232141         | 43967 | 166                                   | 65   | 35.5                                            | 32.5  | m      |
| E6-31,5      | 9751     | 31.5     | 105.943                 | 0.084 |                          |          | 0.986614                                         | 0.016659 |                                                   |        | 17.5                   | 2.7  | 362              | 73     | 362           | 79    | -360182         | 78981 | 49                                    | 10   | 35.5                                            | 32.5  | m      |
| E6-220       | 9750     | 220      | 320.159                 | 0.061 | 0.03241                  | 0.00073  | 0.980511                                         | 0.008439 | 29981                                             | 721    | 20.9                   | 6.4  | 336              | 30     | 335           | 30    | -333380         | 30136 | 54                                    | 17   | 35.5                                            | 32.5  | m      |
| E6-220       | 9750     | 220      | 320.178                 | 0.042 | 0.0321                   | 0.00077  | 0.983431                                         | 0.009216 | 30260                                             | 777    | 21.4                   | 6.7  | 341              | 34     | 341           | 35    | -338533         | 34946 | 56                                    | 18   | 35.5                                            | 32.5  | m      |
| E6-220       | 9750     | 220      | 320.165                 | 0.098 | 0.02658                  | 0.00062  | 0.971227                                         | 0.005171 | 36053                                             | 863    | 14.6                   | 2.2  | 333              | 13     | 332           | 13    | -330439         | 13297 | 37.4                                  | 5.9  | 35.5                                            | 32.5  | m      |
| E7-B-21,5    | 9754     | 21.5     | 887.647                 | 0.091 | 0.07604                  | 0.00073  | 0.011399                                         | 0.000197 | 411.1                                             | 8.1    | 39                     | 1.8  | 1.203            | 0.021  | 1.1           | 0.1   | 920             | 96    | 39.2                                  | 1.8  | 35.5                                            | 32.5  | m      |
| E8-TOP       | 10984    | 0        | 1221.09                 | 0.068 | 2.4599                   | 0.0046   | 0.022375                                         | 0.000184 | 34.05                                             | 0.29   | 9.93                   | 0.91 | 2.443            | 0.021  |               |       |                 |       |                                       |      | 31.6                                            | 2.3   | s      |
| E8-8,5       | 11340    | 8.5      | 1176.211                | 0.049 | 0.03538                  | 0.00011  | 0.003085                                         | 0.000044 | 313.7                                             | 4.5    | 12.64                  | 0.83 | 0.3327           | 0.0047 | 0.295         | 0.035 | 1726            | 35    | 12.65                                 | 0.84 | 35.5                                            | 32.5  | m      |
| E8-14,5      | 11229    | 14.5     | 948.936                 | 0.046 | 0.01924                  | 0.000081 | 0.003505                                         | 0.000068 | 527                                               | 10     | 12.04                  | 0.68 | 0.3783           | 0.0074 | 0.353         | 0.024 | 1668            | 24    | 12.05                                 | 0.68 | 35.5                                            | 32.5  | m      |
| E8-21        | 11341    | 21       | 1082.946                | 0.042 | 0.029229                 | 0.000079 | 0.003795                                         | 0.000072 | 430.5                                             | 8.3    | 14.15                  | 0.56 | 0.4088           | 0.0078 | 0.375         | 0.031 | 1646            | 31    | 14.17                                 | 0.56 | 35.5                                            | 32.5  | m      |
| E8-26        | 11055    | 26       | 882.458                 | 0.054 | 0.0518                   | 0.00018  | 0.003951                                         | 0.000089 | 205.6                                             | 4.7    | 12.98                  | 0.87 | 0.426            | 0.01   | 0.353         | 0.07  | 1668            | 70    | 12.99                                 | 0.87 | 35.5                                            | 32.5  | m      |
| E8-29        | 11056    | 29       | 1026.913                | 0.053 | 0.03556                  | 0.00011  | 0.004532                                         | 0.000078 | 399.8                                             | 7      | 15.3                   | 0.92 | 0.4878           | 0.0084 | 0.48          | 0.009 | 1541            | 9     | 15.32                                 | 0.92 | 6.4                                             | 2.4   | i      |
| E8-32        | 11676    | 32       | 1116.095                | 0.039 | 0.08274                  | 0.00015  | 0.004613                                         | 0.000054 | 190.5                                             | 2.3    | 13.5                   | 0.82 | 0.4974           | 0.006  |               |       |                 |       |                                       |      | 6.4                                             | 2.4   | i      |
| E8-35,5      | 11677    | 35.5     | 1058.437                | 0.055 | 0.09093                  | 0.00023  | 0.004632                                         | 0.000063 | 165.4                                             | 2.3    | 15.77                  | 0.79 | 0.4984           | 0.0068 |               |       |                 |       |                                       |      | 6.4                                             | 2.4   | i      |
| E8-37        | 11342    | 37       | 1100.165                | 0.064 | 0.17512                  | 0.00047  | 0.004792                                         | 0.000072 | 92.1                                              | 1.4    | 15.35                  | 0.74 | 0.5158           | 0.0077 |               |       |                 |       |                                       |      | 6.4                                             | 2.4   | i      |
| E8-42        | 11678    | 42       | 1341.937                | 0.056 | 0.11717                  | 0.00041  | 0.00455                                          | 0.000079 | 159.9                                             | 2.8    | 16.2                   | 1    | 0.4894           | 0.0085 |               |       |                 |       |                                       |      | 4                                               | 1     | s,m    |
| E8-46,5      | 11679    | 46.5     | 1367.938                | 0.07  | 0.10724                  | 0.00031  | 0.004584                                         | 0.000078 | 178.9                                             | 3.1    | 15.3                   | 0.76 | 0.4935           | 0.0085 |               |       |                 |       |                                       |      | 5.25                                            | 2.25  | s,m    |
| E8-48        | 10985    | 48       | 1310.124                | 0.077 | 0.08031                  | 0.00027  | 0.004577                                         | 0.00008  | 228.5                                             | 4.1    | 14.73                  | 0.95 | 0.4929           | 0.0087 | 0.48          | 0.011 | 1542            | 11    | 14.75                                 | 0.95 | 6.25                                            | 3.25  | s,m    |

| SAMPLE LABEL         | Lab. No. | dft (mm) | <sup>238</sup> U (ng/g) | ±2σ   | <sup>232</sup> Th (ng/g) | ±2σ      | <sup>230</sup> Th/ <sup>238</sup> U (act. Ratio) | ±2σ      | <sup>230</sup> Th/ <sup>232</sup> Th (act. Ratio) | ±2σ  | δ <sup>234</sup> U (‰) | ±2σ  | uncorr. Age (ka) | ±2σ    | corr.age (ka) | ±2σ   | corr.age (a ad) | ±2σ  | δ <sup>234</sup> U <sub>ini</sub> (‰) | ±2σ  | ( <sup>230</sup> Th/ <sup>232</sup> Th) initial | Error | Method |
|----------------------|----------|----------|-------------------------|-------|--------------------------|----------|--------------------------------------------------|----------|---------------------------------------------------|------|------------------------|------|------------------|--------|---------------|-------|-----------------|------|---------------------------------------|------|-------------------------------------------------|-------|--------|
| E8-55                | 11231    | 55       | 596.551                 | 0.027 | 0.09265                  | 0.00034  | 0.013494                                         | 0.000194 | 264.7                                             | 3.9  | 7.5                    | 1    | 1.47             | 0.022  | 1.27          | 0.18  | 746             | 181  | 7.5                                   | 1    | 35.5                                            | 32.5  | m      |
| E8-60,5              | 11057    | 60.5     | 523.577                 | 0.04  | 0.06993                  | 0.00029  | 0.013166                                         | 0.000207 | 301.7                                             | 4.9  | 7.1                    | 1.4  | 1.435            | 0.023  | 1.27          | 0.15  | 754             | 148  | 7.1                                   | 1.4  | 35.5                                            | 32.5  | m      |
| E8-67                | 9633     | 67       | 597.658                 | 0.057 | 0.598                    | 0.0015   | 0.016261                                         | 0.000334 | 50                                                | 1    | 9.9                    | 1.9  | 1.77             | 0.036  |               |       |                 |      |                                       |      | 35.5                                            | 32.5  | m      |
| E-23-1-B             | 12454    | 0        | 874.48                  | 0.32  | 0.05694                  | 0.00094  | 0.509867                                         | 0.000888 | 24283                                             | 405  | 23.79                  | 0.55 | 74.9             | 0.2    | 74.82         | 0.21  | -72799          | 206  | 29.38                                 | 0.68 | 35.5                                            | 32.5  | m      |
| E-23-1-T             | 12459    | 0        | 680.29                  | 0.34  | 3.624                    | 0.0057   | 0.146284                                         | 0.00048  | 85.25                                             | 0.31 | 27.53                  | 0.85 | 16.735           | 0.061  |               |       |                 |      |                                       |      | 35.5                                            | 32.5  | m      |
| E-23-2-B             | 12455    | 0        | 535.299                 | 0.038 | 0.12051                  | 0.00025  | 0.020089                                         | 0.000121 | 276.7                                             | 1.8  | 22.22                  | 0.53 | 2.164            | 0.013  | 1.88          | 0.26  | 138             | 259  | 22.34                                 | 0.53 | 35.5                                            | 32.5  | m      |
| E-23-2-T             | 12460    | 0        | 899.094                 | 0.033 | 0.04017                  | 0.00014  | 0.002021                                         | 0.000032 | 140.2                                             | 2.3  | 15.01                  | 0.35 | 0.2173           | 0.0034 |               |       |                 |      |                                       |      | 35.5                                            | 32.5  | m      |
| E-23-3B-7,5          | 12464    | 7.5      | 1309.574                | 0.061 | 0.04209                  | 0.00013  | 0.000583                                         | 0.000023 | 55.9                                              | 2.2  | 21.77                  | 0.63 | 0.0622           | 0.0025 |               |       |                 |      |                                       |      | 26                                              | 7     | lc     |
| E-23-3B-29           | 12465    | 29       | 1133.958                | 0.091 | 0.04686                  | 0.00014  | 0.001476                                         | 0.000049 | 110.1                                             | 3.7  | 22.6                   | 0.73 | 0.1575           | 0.0052 |               |       |                 |      |                                       |      | 26                                              | 7     | lc     |
| E-23-3B-60           | 12825    | 60       | 1264.36                 | 0.59  | 0.027192                 | 0.000093 | 0.002369                                         | 0.000036 | 344.2                                             | 5.4  | 19.63                  | 0.55 | 0.2537           | 0.0053 | 0.234         | 0.006 | 1790            | 6    | 19.64                                 | 0.55 | 26                                              | 7     | lc     |
| E-23-3B-92           | 12824    | 92       | 1261.47                 | 0.39  | 0.03349                  | 0.00016  | 0.003411                                         | 0.000058 | 400.8                                             | 7.1  | 20.16                  | 0.4  | 0.3652           | 0.0078 | 0.341         | 0.009 | 1683            | 9    | 20.18                                 | 0.4  | 26                                              | 7     | lc     |
| E-23-3B-125          | 12467    | 125      | 1422.348                | 0.065 | 0.022633                 | 0.000066 | 0.00479                                          | 0.000034 | 937.1                                             | 7.1  | 20.72                  | 0.47 | 0.513            | 0.0036 | 0.499         | 0.005 | 1526            | 5    | 20.74                                 | 0.47 | 26                                              | 7     | lc     |
| E-23-3B-146          | 12468    | 146      | 1501.446                | 0.054 | 0.04257                  | 0.00011  | 0.005505                                         | 0.000045 | 603.5                                             | 5.2  | 21.12                  | 0.48 | 0.5895           | 0.0049 | 0.564         | 0.008 | 1460            | 8    | 21.16                                 | 0.48 | 26                                              | 7     | lc     |
| E-23-3A-190          | 12462    | 190      | 1273.973                | 0.078 | 0.05294                  | 0.00015  | 0.00641                                          | 0.000083 | 476.4                                             | 6.3  | 21.85                  | 0.68 | 0.6861           | 0.0089 | 0.648         | 0.013 | 1376            | 13   | 21.89                                 | 0.68 | 26                                              | 7     | lc     |
| E-23-3A-268          | 12463    | 268      | 1362.189                | 0.058 | 0.0454                   | 0.00012  | 0.008981                                         | 0.000061 | 830.7                                             | 6.1  | 23.47                  | 0.39 | 0.961            | 0.0066 | 0.931         | 0.011 | 1093            | 11   | 23.54                                 | 0.39 | 26                                              | 7     | lc     |
| Estrella loc.5       | 11705    | -        | 925.727                 | 0.048 | 4.7348                   | 0.0073   | 0.983                                            | 0.0017   | 593.3                                             | 1.4  | 15.76                  | 0.62 | 358.3            | 5.3    | 351.9         | 8.1   | -349878         | 8085 | 42.6                                  | 1.9  | 35.5                                            | 32.5  | m      |
| Estrella drip Site 1 | 11706    | -        | 1325.237                | 0.06  | 24.42                    | 0.043    | 0.03924                                          | 0.00017  | 6.571                                             | 0.03 | 3.11                   | 0.65 | 4.352            | 0.02   | 0.01          | 1.38  | 2016            | 1378 | 3.11                                  | 0.65 | 6.5                                             | 3.25  | zac    |

**Table S 4 Stable isotope data of speleothem E0-C. The age of each sample corresponds to the chronology discussed in the main text.**

| Sample ID | Lab                                                | dft<br>[cm] | Age [a<br>BP] | Age<br>[a AD] | Age error<br>[a] | $\delta^{13}\text{C}$<br>[‰ VPDB] | $\delta^{18}\text{O}$<br>[‰ VPDB] |
|-----------|----------------------------------------------------|-------------|---------------|---------------|------------------|-----------------------------------|-----------------------------------|
| E0-C-704  | Institute of Earth Sciences, Heidelberg University | 0.3         |               |               |                  | -10.40                            | -4.80                             |
| E0-C-703  | Institute of Earth Sciences, Heidelberg University | 0.4         |               |               |                  | -11.33                            | -4.98                             |
| E0-C-702  | Institute of Earth Sciences, Heidelberg University | 0.5         |               |               |                  | -11.04                            | -4.72                             |
| E0-C-700  | Institute of Earth Sciences, Heidelberg University | 0.7         |               |               |                  | -11.91                            | -5.16                             |
| E0-C-699  | Institute of Earth Sciences, Heidelberg University | 0.8         |               |               |                  | -10.49                            | -4.98                             |
| E0-C-698  | Institute of Earth Sciences, Heidelberg University | 0.9         |               |               |                  | -11.57                            | -5.28                             |
| E0-C-697  | Institute of Earth Sciences, Heidelberg University | 1           |               |               |                  | -11.47                            | -5.34                             |
| E0-C-696  | Institute of Earth Sciences, Heidelberg University | 1.1         |               |               |                  | -11.63                            | -5.46                             |
| E0-C-695  | Institute of Earth Sciences, Heidelberg University | 1.2         |               |               |                  | -12.23                            | -5.39                             |
| E0-C-694  | Institute of Earth Sciences, Heidelberg University | 1.3         |               |               |                  | -11.73                            | -5.17                             |
| E0-C-693  | Institute of Earth Sciences, Heidelberg University | 1.4         |               |               |                  | -12.55                            | -5.33                             |
| E0-C-692  | Institute of Earth Sciences, Heidelberg University | 1.5         |               |               |                  | -11.93                            | -4.96                             |
| E0-C-691  | Institute of Earth Sciences, Heidelberg University | 1.6         |               |               |                  | -11.33                            | -4.38                             |
| E0-C-689  | Institute of Earth Sciences, Heidelberg University | 1.8         |               |               |                  | -11.19                            | -4.12                             |
| E0-C-688  | Institute of Earth Sciences, Heidelberg University | 1.9         |               |               |                  | -10.86                            | -4.19                             |
| E0-C-687  | Institute of Earth Sciences, Heidelberg University | 2           |               |               |                  | -11.31                            | -4.05                             |
| E0-C-686  | Institute of Earth Sciences, Heidelberg University | 2.1         |               |               |                  | -12.09                            | -4.26                             |
| E0-C-685  | Institute of Earth Sciences, Heidelberg University | 2.2         |               |               |                  | -11.51                            | -4.34                             |
| E0-C-684  | Institute of Earth Sciences, Heidelberg University | 2.3         |               |               |                  | -11.26                            | -4.16                             |
| E0-C-683  | Institute of Earth Sciences, Heidelberg University | 2.4         |               |               |                  | -11.38                            | -4.24                             |
| E0-C-682  | Institute of Earth Sciences, Heidelberg University | 2.5         |               |               |                  | -11.69                            | -4.33                             |
| E0-C-681  | Institute of Earth Sciences, Heidelberg University | 2.6         |               |               |                  | -12.02                            | -4.25                             |
| E0-C-679  | Institute of Earth Sciences, Heidelberg University | 2.8         |               |               |                  | -11.88                            | -4.50                             |
| E0-C-678  | Institute of Earth Sciences, Heidelberg University | 2.9         |               |               |                  | -11.53                            | -4.43                             |
| E0-C-677  | Institute of Earth Sciences, Heidelberg University | 3           |               |               |                  | -11.24                            | -4.37                             |
| E0-C-676  | Institute of Earth Sciences, Heidelberg University | 3.1         |               |               |                  | -11.10                            | -4.30                             |
| E0-C-674  | Institute of Earth Sciences, Heidelberg University | 3.3         |               |               |                  | -12.61                            | -4.56                             |
| E0-C-673  | Institute of Earth Sciences, Heidelberg University | 3.4         |               |               |                  | -12.75                            | -4.55                             |
| E0-C-672  | Institute of Earth Sciences, Heidelberg University | 3.5         |               |               |                  | -11.88                            | -4.51                             |
| E0-C-671  | Institute of Earth Sciences, Heidelberg University | 3.6         |               |               |                  | -11.61                            | -4.37                             |
| E0-C-670  | Institute of Earth Sciences, Heidelberg University | 3.7         |               |               |                  | -11.31                            | -4.40                             |
| E0-C-669  | Institute of Earth Sciences, Heidelberg University | 3.8         |               |               |                  | -11.00                            | -4.15                             |
| E0-C-668  | Institute of Earth Sciences, Heidelberg University | 3.9         |               |               |                  | -10.51                            | -4.07                             |
| E0-C-667  | Institute of Earth Sciences, Heidelberg University | 4           |               |               |                  | -11.06                            | -4.11                             |
| E0-C-666  | Institute of Earth Sciences, Heidelberg University | 4.1         |               |               |                  | -11.20                            | -4.14                             |
| E0-C-665  | Institute of Earth Sciences, Heidelberg University | 4.2         |               |               |                  | -11.60                            | -4.17                             |
| E0-C-664  | Institute of Earth Sciences, Heidelberg University | 4.3         |               |               |                  | -10.14                            | -4.03                             |
| E0-C-663  | Institute of Earth Sciences, Heidelberg University | 4.4         |               |               |                  | -9.06                             | -3.83                             |
| E0-C-662  | Institute of Earth Sciences, Heidelberg University | 4.5         |               |               |                  | -9.39                             | -4.01                             |
| E0-C-661  | Institute of Earth Sciences, Heidelberg University | 4.6         |               |               |                  | -10.44                            | -4.27                             |
| E0-C-660  | Institute of Earth Sciences, Heidelberg University | 4.7         |               |               |                  | -10.14                            | -4.39                             |
| E0-C-659  | Institute of Earth Sciences, Heidelberg University | 4.8         |               |               |                  | -9.25                             | -4.70                             |
| E0-C-658  | Institute of Earth Sciences, Heidelberg University | 4.9         |               |               |                  | -8.84                             | -4.84                             |
| E0-C-657  | Institute of Earth Sciences, Heidelberg University | 5           |               |               |                  | -9.08                             | -4.72                             |
| E0-C-656  | Institute of Earth Sciences, Heidelberg University | 5.1         | 115.77        | 1834.23       | 52.83            | -9.84                             | -5.13                             |
| E0-C-655  | Institute of Earth Sciences, Heidelberg University | 5.2         | 116.91        | 1833.09       | 52.58            | -8.93                             | -4.26                             |
| E0-C-654  | Institute of Earth Sciences, Heidelberg University | 5.3         | 117.90        | 1832.10       | 52.40            | -9.07                             | -4.24                             |
| E0-C-653  | Institute of Earth Sciences, Heidelberg University | 5.4         | 118.90        | 1831.10       | 52.26            | -10.09                            | -4.37                             |
| E0-C-652  | Institute of Earth Sciences, Heidelberg University | 5.5         | 119.83        | 1830.17       | 52.16            | -10.93                            | -5.20                             |
| E0-C-651  | Institute of Earth Sciences, Heidelberg University | 5.6         | 120.92        | 1829.08       | 52.06            | -10.88                            | -5.63                             |
| E0-C-649  | Institute of Earth Sciences, Heidelberg University | 5.8         | 123.01        | 1826.99       | 51.90            | -10.84                            | -5.70                             |
| E0-C-648  | Institute of Earth Sciences, Heidelberg University | 5.9         | 124.07        | 1825.93       | 51.90            | -10.82                            | -4.99                             |
| E0-C-647  | Institute of Earth Sciences, Heidelberg University | 6           | 125.18        | 1824.82       | 51.76            | -10.11                            | -4.82                             |
| E0-C-624  | Elemtext Ltd., Cornwall                            | 6.1         | 126.55        | 1823.45       | 51.36            | -10.45                            | -4.80                             |
| E0-C-623  | Elemtext Ltd., Cornwall                            | 6.35        | 129.39        | 1820.61       | 50.79            | -9.59                             | -4.32                             |
| E0-C-622  | Elemtext Ltd., Cornwall                            | 6.6         | 131.92        | 1818.08       | 50.30            | -9.79                             | -4.13                             |
| E0-C-621  | Elemtext Ltd., Cornwall                            | 6.85        | 134.61        | 1815.39       | 49.86            | -10.38                            | -3.91                             |
| E0-C-620  | Institute of Earth Sciences, Heidelberg University | 7.1         | 137.58        | 1812.42       | 49.37            | -10.40                            | -4.65                             |
| E0-C-619  | Elemtext Ltd., Cornwall                            | 7.35        | 140.20        | 1809.80       | 48.86            | -10.03                            | -4.32                             |
| E0-C-618  | Institute of Earth Sciences, Heidelberg University | 7.6         | 142.70        | 1807.30       | 48.52            | -9.98                             | -4.77                             |
| E0-C-617  | Elemtext Ltd., Cornwall                            | 7.85        | 145.23        | 1804.77       | 48.20            | -10.08                            | -4.57                             |
| E0-C-616  | Institute of Earth Sciences, Heidelberg University | 8.1         | 147.64        | 1802.36       | 47.82            | -10.14                            | -4.93                             |
| E0-C-615  | Elemtext Ltd., Cornwall                            | 8.35        | 150.27        | 1799.73       | 47.18            | -9.74                             | -4.48                             |
| E0-C-614  | Institute of Earth Sciences, Heidelberg University | 8.6         | 152.63        | 1797.37       | 46.73            | -10.08                            | -5.23                             |
| E0-C-613  | Elemtext Ltd., Cornwall                            | 8.85        | 155.08        | 1794.92       | 46.16            | -9.82                             | -4.69                             |
| E0-C-612  | Institute of Earth Sciences, Heidelberg University | 9.1         | 157.86        | 1792.14       | 45.68            | -10.01                            | -5.35                             |
| E0-C-611  | Elemtext Ltd., Cornwall                            | 9.35        | 160.54        | 1789.46       | 45.17            | -10.19                            | -4.90                             |
| E0-C-610  | Institute of Earth Sciences, Heidelberg University | 9.6         | 163.19        | 1786.81       | 44.69            | -10.29                            | -5.56                             |
| E0-C-609  | Elemtext Ltd., Cornwall                            | 9.85        | 165.79        | 1784.21       | 44.28            | -10.25                            | -5.08                             |
| E0-C-608  | Institute of Earth Sciences, Heidelberg University | 10.1        | 168.48        | 1781.52       | 43.84            | -10.33                            | -5.66                             |
| E0-C-607  | Elemtext Ltd., Cornwall                            | 10.35       | 171.25        | 1778.75       | 43.02            | -10.19                            | -5.34                             |
| E0-C-606  | Institute of Earth Sciences, Heidelberg University | 10.6        | 173.78        | 1776.22       | 42.46            | -10.31                            | -5.56                             |
| E0-C-605  | Elemtext Ltd., Cornwall                            | 10.85       | 176.59        | 1773.41       | 41.68            | -9.99                             | -5.04                             |
| E0-C-604  | Institute of Earth Sciences, Heidelberg University | 11.1        | 179.28        | 1770.72       | 40.94            | -10.82                            | -5.87                             |

|          |                                                    |       |        |         |       |        |       |
|----------|----------------------------------------------------|-------|--------|---------|-------|--------|-------|
| E0-C-603 | Elemtext Ltd., Cornwall                            | 11.35 | 181.82 | 1768.18 | 40.29 | -10.09 | -5.43 |
| E0-C-602 | Institute of Earth Sciences, Heidelberg University | 11.6  | 184.37 | 1765.63 | 39.74 | -10.22 | -5.78 |
| E0-C-601 | Elemtext Ltd., Cornwall                            | 11.85 | 186.96 | 1763.04 | 39.16 | -10.42 | -5.29 |
| E0-C-600 | Institute of Earth Sciences, Heidelberg University | 12.1  | 189.38 | 1760.62 | 38.66 | -10.21 | -5.86 |
| E0-C-599 | Elemtext Ltd., Cornwall                            | 12.35 | 191.75 | 1758.25 | 37.94 | -10.23 | -5.73 |
| E0-C-598 | Institute of Earth Sciences, Heidelberg University | 12.6  | 194.38 | 1755.62 | 37.13 | -10.85 | -6.00 |
| E0-C-597 | Elemtext Ltd., Cornwall                            | 12.85 | 196.88 | 1753.12 | 36.29 | -10.81 | -5.63 |
| E0-C-596 | Institute of Earth Sciences, Heidelberg University | 13.1  | 199.24 | 1750.76 | 35.67 | -10.50 | -5.82 |
| E0-C-595 | Elemtext Ltd., Cornwall                            | 13.35 | 201.64 | 1748.36 | 35.06 | -10.01 | -5.34 |
| E0-C-594 | Institute of Earth Sciences, Heidelberg University | 13.6  | 203.93 | 1746.07 | 34.25 | -10.47 | -5.84 |
| E0-C-593 | Elemtext Ltd., Cornwall                            | 13.85 | 206.19 | 1743.81 | 33.53 | -10.18 | -6.09 |
| E0-C-592 | Institute of Earth Sciences, Heidelberg University | 14.1  | 208.57 | 1741.43 | 32.60 | -10.54 | -5.96 |
| E0-C-591 | Elemtext Ltd., Cornwall                            | 14.35 | 210.80 | 1739.20 | 31.64 | -10.27 | -5.36 |
| E0-C-590 | Institute of Earth Sciences, Heidelberg University | 14.6  | 213.16 | 1736.84 | 30.45 | -10.45 | -5.94 |
| E0-C-589 | Elemtext Ltd., Cornwall                            | 14.85 | 215.35 | 1734.65 | 29.41 | -10.77 | -5.78 |
| E0-C-588 | Institute of Earth Sciences, Heidelberg University | 15.1  | 217.61 | 1732.39 | 28.39 | -10.42 | -5.89 |
| E0-C-587 | Elemtext Ltd., Cornwall                            | 15.35 | 220.09 | 1729.91 | 27.00 | -10.37 | -5.69 |
| E0-C-586 | Institute of Earth Sciences, Heidelberg University | 15.6  | 222.37 | 1727.63 | 25.68 | -10.46 | -5.83 |
| E0-C-585 | Elemtext Ltd., Cornwall                            | 15.85 | 224.26 | 1725.74 | 24.72 | -10.68 | -5.16 |
| E0-C-584 | Institute of Earth Sciences, Heidelberg University | 16.1  | 226.35 | 1723.65 | 23.51 | -10.29 | -5.58 |
| E0-C-583 | Elemtext Ltd., Cornwall                            | 16.35 | 228.34 | 1721.66 | 22.53 | -10.66 | -5.10 |
| E0-C-582 | Institute of Earth Sciences, Heidelberg University | 16.6  | 230.33 | 1719.67 | 21.67 | -11.22 | -5.88 |
| E0-C-581 | Elemtext Ltd., Cornwall                            | 16.85 | 232.57 | 1717.43 | 20.33 | -11.39 | -5.60 |
| E0-C-580 | Institute of Earth Sciences, Heidelberg University | 17.1  | 234.44 | 1715.56 | 19.60 | -11.40 | -6.06 |
| E0-C-579 | Elemtext Ltd., Cornwall                            | 17.35 | 236.25 | 1713.75 | 19.14 | -10.94 | -5.49 |
| E0-C-578 | Institute of Earth Sciences, Heidelberg University | 17.6  | 237.65 | 1712.35 | 19.72 | -11.14 | -6.07 |
| E0-C-577 | Elemtext Ltd., Cornwall                            | 17.85 | 239.19 | 1710.81 | 20.65 | -10.78 | -5.19 |
| E0-C-576 | Institute of Earth Sciences, Heidelberg University | 18.1  | 241.10 | 1708.90 | 21.34 | -10.89 | -5.65 |
| E0-C-575 | Elemtext Ltd., Cornwall                            | 18.35 | 243.46 | 1706.54 | 21.71 | -11.17 | -5.35 |
| E0-C-574 | Institute of Earth Sciences, Heidelberg University | 18.6  | 246.17 | 1703.83 | 21.94 | -11.12 | -5.67 |
| E0-C-573 | Elemtext Ltd., Cornwall                            | 18.85 | 248.97 | 1701.03 | 22.21 | -10.98 | -5.20 |
| E0-C-572 | Institute of Earth Sciences, Heidelberg University | 19.1  | 252.41 | 1697.59 | 21.99 | -10.99 | -6.62 |
| E0-C-571 | Elemtext Ltd., Cornwall                            | 19.35 | 257.89 | 1692.11 | 21.50 | -10.52 | -4.99 |
| E0-C-570 | Institute of Earth Sciences, Heidelberg University | 19.6  | 264.70 | 1685.30 | 22.58 | -10.79 | -5.98 |
| E0-C-569 | Elemtext Ltd., Cornwall                            | 19.85 | 270.92 | 1679.08 | 24.51 | -10.57 | -5.68 |
| E0-C-568 | Institute of Earth Sciences, Heidelberg University | 20.1  | 276.26 | 1673.74 | 25.43 | -10.33 | -6.07 |
| E0-C-567 | Elemtext Ltd., Cornwall                            | 20.35 | 281.54 | 1668.46 | 25.49 | -10.66 | -5.14 |
| E0-C-566 | Institute of Earth Sciences, Heidelberg University | 20.6  | 287.23 | 1662.77 | 25.68 | -10.88 | -5.04 |
| E0-C-565 | Elemtext Ltd., Cornwall                            | 20.85 | 293.16 | 1656.84 | 26.12 | -11.31 | -4.29 |
| E0-C-564 | Institute of Earth Sciences, Heidelberg University | 21.1  | 298.80 | 1651.20 | 26.95 | -11.37 | -4.82 |
| E0-C-563 | Elemtext Ltd., Cornwall                            | 21.35 | 304.01 | 1645.99 | 27.93 | -11.56 | -4.71 |
| E0-C-562 | Institute of Earth Sciences, Heidelberg University | 21.6  | 309.03 | 1640.97 | 28.99 | -11.83 | -5.30 |
| E0-C-561 | Elemtext Ltd., Cornwall                            | 21.85 | 313.76 | 1636.24 | 30.06 | -11.62 | -5.06 |
| E0-C-560 | Institute of Earth Sciences, Heidelberg University | 22.1  | 317.88 | 1632.12 | 30.92 | -11.65 | -5.01 |
| E0-C-559 | Elemtext Ltd., Cornwall                            | 22.35 | 321.63 | 1628.37 | 31.60 | -11.57 | -4.82 |
| E0-C-558 | Institute of Earth Sciences, Heidelberg University | 22.6  | 325.44 | 1624.56 | 32.02 | -11.62 | -5.15 |
| E0-C-557 | Elemtext Ltd., Cornwall                            | 22.85 | 328.92 | 1621.08 | 32.41 | -11.30 | -4.93 |
| E0-C-556 | Institute of Earth Sciences, Heidelberg University | 23.1  | 332.36 | 1617.64 | 32.74 | -11.43 | -5.38 |
| E0-C-555 | Elemtext Ltd., Cornwall                            | 23.35 | 335.60 | 1614.40 | 33.07 | -11.41 | -5.14 |
| E0-C-554 | Institute of Earth Sciences, Heidelberg University | 23.6  | 339.20 | 1610.80 | 32.96 | -11.53 | -5.73 |
| E0-C-553 | Elemtext Ltd., Cornwall                            | 23.85 | 342.63 | 1607.37 | 32.78 | -11.27 | -5.24 |
| E0-C-552 | Institute of Earth Sciences, Heidelberg University | 24.1  | 345.67 | 1604.33 | 32.53 | -11.33 | -5.44 |
| E0-C-551 | Elemtext Ltd., Cornwall                            | 24.35 | 348.50 | 1601.50 | 32.29 | -10.56 | -5.15 |
| E0-C-550 | Institute of Earth Sciences, Heidelberg University | 24.6  | 351.60 | 1598.40 | 32.11 | -9.92  | -5.53 |
| E0-C-549 | Elemtext Ltd., Cornwall                            | 24.85 | 354.95 | 1595.05 | 31.81 | -9.02  | -4.91 |
| E0-C-548 | Elemtext Ltd., Cornwall                            | 25.1  | 358.66 | 1591.34 | 31.34 | -8.89  | -5.36 |
| E0-C-547 | Elemtext Ltd., Cornwall                            | 25.35 | 361.76 | 1588.24 | 30.96 | -8.13  | -4.70 |
| E0-C-545 | Elemtext Ltd., Cornwall                            | 25.85 | 368.28 | 1581.72 | 30.10 | -9.95  | -4.90 |
| E0-C-544 | Elemtext Ltd., Cornwall                            | 26.1  | 371.73 | 1578.27 | 29.65 | -9.96  | -5.02 |
| E0-C-543 | Elemtext Ltd., Cornwall                            | 26.35 | 374.40 | 1575.60 | 29.56 | -9.57  | -5.15 |
| E0-C-542 | Institute of Earth Sciences, Heidelberg University | 26.6  | 377.19 | 1572.81 | 29.25 | -9.73  | -5.05 |
| E0-C-541 | Elemtext Ltd., Cornwall                            | 26.85 | 380.61 | 1569.39 | 28.78 | -10.30 | -4.80 |
| E0-C-540 | Institute of Earth Sciences, Heidelberg University | 27.1  | 383.71 | 1566.29 | 28.31 | -10.19 | -5.50 |
| E0-C-539 | Elemtext Ltd., Cornwall                            | 27.35 | 386.61 | 1563.39 | 28.10 | -9.62  | -5.36 |
| E0-C-538 | Institute of Earth Sciences, Heidelberg University | 27.6  | 389.45 | 1560.55 | 27.99 | -9.63  | -5.67 |
| E0-C-537 | Elemtext Ltd., Cornwall                            | 27.85 | 392.28 | 1557.72 | 28.06 | -9.81  | -5.62 |
| E0-C-536 | Institute of Earth Sciences, Heidelberg University | 28.1  | 395.53 | 1554.47 | 27.80 | -9.09  | -5.94 |
| E0-C-535 | Elemtext Ltd., Cornwall                            | 28.35 | 398.50 | 1551.50 | 27.53 | -9.04  | -5.30 |
| E0-C-534 | Institute of Earth Sciences, Heidelberg University | 28.6  | 401.24 | 1548.76 | 27.45 | -9.40  | -5.10 |
| E0-C-533 | Elemtext Ltd., Cornwall                            | 28.85 | 404.08 | 1545.92 | 27.24 | -9.61  | -4.36 |
| E0-C-532 | Institute of Earth Sciences, Heidelberg University | 29.1  | 406.86 | 1543.14 | 27.06 | -10.59 | -4.83 |
| E0-C-531 | Elemtext Ltd., Cornwall                            | 29.35 | 409.64 | 1540.36 | 26.72 | -9.64  | -4.33 |
| E0-C-530 | Institute of Earth Sciences, Heidelberg University | 29.6  | 412.12 | 1537.88 | 26.58 | -9.99  | -4.70 |
| E0-C-529 | Elemtext Ltd., Cornwall                            | 29.85 | 414.76 | 1535.24 | 26.32 | -10.24 | -4.45 |
| E0-C-528 | Institute of Earth Sciences, Heidelberg University | 30.1  | 417.23 | 1532.77 | 26.09 | -10.43 | -4.76 |
| E0-C-527 | Elemtext Ltd., Cornwall                            | 30.35 | 419.88 | 1530.12 | 25.88 | -10.69 | -4.61 |
| E0-C-526 | Institute of Earth Sciences, Heidelberg University | 30.6  | 422.39 | 1527.61 | 25.72 | -10.51 | -4.90 |
| E0-C-525 | Elemtext Ltd., Cornwall                            | 30.85 | 424.80 | 1525.20 | 25.52 | -10.58 | -4.63 |
| E0-C-524 | Institute of Earth Sciences, Heidelberg University | 31.1  | 427.41 | 1522.59 | 25.33 | -10.76 | -5.07 |
| E0-C-523 | Elemtext Ltd., Cornwall                            | 31.35 | 430.10 | 1519.90 | 25.10 | -10.69 | -5.08 |

|          |                                                    |       |        |         |       |        |       |
|----------|----------------------------------------------------|-------|--------|---------|-------|--------|-------|
| E0-C-522 | Institute of Earth Sciences, Heidelberg University | 31.6  | 432.68 | 1517.32 | 24.89 | -10.69 | -5.10 |
| E0-C-521 | Elemtex Ltd., Cornwall                             | 31.85 | 435.29 | 1514.71 | 24.61 | -11.11 | -5.13 |
| E0-C-520 | Institute of Earth Sciences, Heidelberg University | 32.1  | 437.91 | 1512.09 | 24.27 | -10.83 | -5.30 |
| E0-C-519 | Elemtex Ltd., Cornwall                             | 32.35 | 440.57 | 1509.43 | 23.92 | -10.67 | -5.14 |
| E0-C-518 | Institute of Earth Sciences, Heidelberg University | 32.6  | 443.17 | 1506.83 | 23.57 | -11.13 | -5.34 |
| E0-C-517 | Elemtex Ltd., Cornwall                             | 32.85 | 445.61 | 1504.39 | 23.24 | -11.58 | -5.09 |
| E0-C-516 | Institute of Earth Sciences, Heidelberg University | 33.1  | 448.21 | 1501.79 | 22.84 | -11.13 | -5.38 |
| E0-C-515 | Elemtex Ltd., Cornwall                             | 33.35 | 450.68 | 1499.32 | 22.46 | -11.33 | -5.17 |
| E0-C-514 | Institute of Earth Sciences, Heidelberg University | 33.6  | 453.19 | 1496.81 | 22.14 | -11.37 | -5.48 |
| E0-C-513 | Elemtex Ltd., Cornwall                             | 33.85 | 455.66 | 1494.34 | 21.79 | -11.36 | -5.17 |
| E0-C-512 | Institute of Earth Sciences, Heidelberg University | 34.1  | 458.16 | 1491.84 | 21.31 | -10.87 | -5.37 |
| E0-C-511 | Elemtex Ltd., Cornwall                             | 34.35 | 460.62 | 1489.38 | 20.85 | -11.09 | -5.11 |
| E0-C-510 | Institute of Earth Sciences, Heidelberg University | 34.6  | 463.14 | 1486.86 | 20.61 | -10.97 | -5.65 |
| E0-C-509 | Elemtex Ltd., Cornwall                             | 34.85 | 465.63 | 1484.37 | 20.51 | -11.13 | -5.35 |
| E0-C-508 | Institute of Earth Sciences, Heidelberg University | 35.1  | 468.10 | 1481.90 | 20.34 | -11.63 | -5.66 |
| E0-C-507 | Elemtex Ltd., Cornwall                             | 35.35 | 470.47 | 1479.53 | 20.22 | -11.59 | -5.38 |
| E0-C-506 | Institute of Earth Sciences, Heidelberg University | 35.6  | 472.87 | 1477.13 | 20.11 | -11.51 | -5.50 |
| E0-C-505 | Elemtex Ltd., Cornwall                             | 35.85 | 475.14 | 1474.86 | 20.10 | -11.39 | -5.04 |
| E0-C-504 | Institute of Earth Sciences, Heidelberg University | 36.1  | 477.30 | 1472.70 | 19.96 | -11.86 | -5.39 |
| E0-C-503 | Elemtex Ltd., Cornwall                             | 36.35 | 479.37 | 1470.63 | 19.95 | -11.57 | -5.10 |
| E0-C-502 | Institute of Earth Sciences, Heidelberg University | 36.6  | 481.50 | 1468.50 | 19.97 | -11.94 | -5.59 |
| E0-C-501 | Elemtex Ltd., Cornwall                             | 36.85 | 483.51 | 1466.49 | 20.11 | -11.52 | -5.14 |
| E0-C-500 | Elemtex Ltd., Cornwall                             | 37.1  | 485.52 | 1464.48 | 20.37 | -10.99 | -5.22 |
| E0-C-499 | Elemtex Ltd., Cornwall                             | 37.35 | 487.45 | 1462.55 | 20.64 | -11.03 | -5.34 |
| E0-C-498 | Elemtex Ltd., Cornwall                             | 37.6  | 489.48 | 1460.52 | 20.85 | -11.38 | -5.25 |
| E0-C-497 | Elemtex Ltd., Cornwall                             | 37.85 | 491.72 | 1458.28 | 21.21 | -11.40 | -5.28 |
| E0-C-496 | Elemtex Ltd., Cornwall                             | 38.1  | 494.01 | 1455.99 | 21.55 | -11.42 | -5.38 |
| E0-C-495 | Elemtex Ltd., Cornwall                             | 38.35 | 496.26 | 1453.74 | 21.99 | -10.82 | -5.18 |
| E0-C-494 | Elemtex Ltd., Cornwall                             | 38.6  | 498.55 | 1451.45 | 22.38 | -10.80 | -4.98 |

**Table S 5 Stable isotope data of speleothem E1. The age of each sample corresponds to the chronology discussed in the main text.**

| Sample ID | Lab                                                | dft<br>[cm] | Age [a BP] | Age<br>[a AD] | Age error<br>[a] | $\delta^{13}\text{C}$<br>[‰ VPDB] | $\delta^{18}\text{O}$<br>[‰ VPDB] |
|-----------|----------------------------------------------------|-------------|------------|---------------|------------------|-----------------------------------|-----------------------------------|
| E1-001    | Institute of Earth Sciences, Heidelberg University | 0.56        | 12.17      | 1937.83       | 21.56            | -9.82                             | -4.78                             |
| E1-002    | Institute of Earth Sciences, Heidelberg University | 0.66        | 12.67      | 1937.33       | 21.46            | -9.76                             | -4.77                             |
| E1-003    | Institute of Earth Sciences, Heidelberg University | 0.76        | 13.21      | 1936.79       | 21.36            | -9.15                             | -4.52                             |
| E1-004    | Institute of Earth Sciences, Heidelberg University | 0.86        | 13.66      | 1936.34       | 21.29            | -9.72                             | -4.82                             |
| E1-005    | Institute of Earth Sciences, Heidelberg University | 0.96        | 14.11      | 1935.89       | 21.23            | -9.89                             | -4.71                             |
| E1-006    | Institute of Earth Sciences, Heidelberg University | 1.06        | 14.55      | 1935.45       | 21.15            | -10.40                            | -4.87                             |
| E1-007    | Institute of Earth Sciences, Heidelberg University | 1.16        | 14.98      | 1935.02       | 21.09            | -10.97                            | -5.05                             |
| E1-008    | Institute of Earth Sciences, Heidelberg University | 1.26        | 15.41      | 1934.59       | 21.04            | -11.72                            | -5.18                             |
| E1-009    | Institute of Earth Sciences, Heidelberg University | 1.36        | 15.86      | 1934.14       | 20.95            | -11.61                            | -5.07                             |
| E1-010    | Institute of Earth Sciences, Heidelberg University | 1.46        | 16.27      | 1933.73       | 20.90            | -10.94                            | -5.13                             |
| E1-011    | Institute of Earth Sciences, Heidelberg University | 1.56        | 16.74      | 1933.26       | 20.82            | -10.71                            | -5.20                             |
| E1-012    | Institute of Earth Sciences, Heidelberg University | 1.66        | 17.26      | 1932.74       | 20.75            | -10.67                            | -5.15                             |
| E1-013    | Institute of Earth Sciences, Heidelberg University | 1.76        | 17.69      | 1932.31       | 20.68            | -10.97                            | -5.21                             |
| E1-014    | Institute of Earth Sciences, Heidelberg University | 1.86        | 18.19      | 1931.81       | 20.61            | -11.46                            | -5.28                             |
| E1-015    | Institute of Earth Sciences, Heidelberg University | 1.96        | 18.64      | 1931.36       | 20.57            | -11.66                            | -5.56                             |
| E1-016    | Institute of Earth Sciences, Heidelberg University | 2.06        | 19.12      | 1930.88       | 20.48            | -11.15                            | -5.53                             |
| E1-017    | Institute of Earth Sciences, Heidelberg University | 2.16        | 19.61      | 1930.39       | 20.40            | -10.51                            | -5.54                             |
| E1-018    | Institute of Earth Sciences, Heidelberg University | 2.26        | 20.10      | 1929.90       | 20.32            | -9.60                             | -5.07                             |
| E1-019    | Institute of Earth Sciences, Heidelberg University | 2.36        | 20.65      | 1929.35       | 20.29            | -10.31                            | -5.71                             |
| E1-020    | Institute of Earth Sciences, Heidelberg University | 2.46        | 21.13      | 1928.87       | 20.20            | -10.70                            | -5.39                             |
| E1-021    | Institute of Earth Sciences, Heidelberg University | 2.56        | 21.60      | 1928.40       | 20.12            | -10.41                            | -5.45                             |
| E1-022    | Institute of Earth Sciences, Heidelberg University | 2.66        | 22.09      | 1927.91       | 20.07            | -10.14                            | -5.47                             |
| E1-023    | Institute of Earth Sciences, Heidelberg University | 2.76        | 22.62      | 1927.38       | 19.96            | -10.69                            | -5.09                             |
| E1-024    | Institute of Earth Sciences, Heidelberg University | 2.86        | 23.05      | 1926.95       | 19.88            | -11.32                            | -5.02                             |
| E1-025    | Institute of Earth Sciences, Heidelberg University | 2.96        | 23.53      | 1926.47       | 19.83            | -11.38                            | -4.84                             |
| E1-026    | Institute of Earth Sciences, Heidelberg University | 3.06        | 24.01      | 1925.99       | 19.71            | -10.13                            | -4.36                             |
| E1-027    | Institute of Earth Sciences, Heidelberg University | 3.16        | 24.48      | 1925.52       | 19.65            | -9.92                             | -4.20                             |
| E1-028    | Institute of Earth Sciences, Heidelberg University | 3.26        | 24.93      | 1925.07       | 19.62            | -9.41                             | -3.87                             |
| E1-029    | Institute of Earth Sciences, Heidelberg University | 3.36        | 25.40      | 1924.60       | 19.54            | -9.20                             | -3.89                             |
| E1-030    | Institute of Earth Sciences, Heidelberg University | 3.46        | 25.84      | 1924.16       | 19.48            | -9.19                             | -4.06                             |
| E1-031    | Institute of Earth Sciences, Heidelberg University | 3.56        | 26.35      | 1923.65       | 19.41            | -9.14                             | -4.07                             |
| E1-032    | Institute of Earth Sciences, Heidelberg University | 3.66        | 26.88      | 1923.12       | 19.33            | -9.16                             | -3.98                             |
| E1-033    | Institute of Earth Sciences, Heidelberg University | 3.76        | 27.34      | 1922.66       | 19.24            | -9.24                             | -4.22                             |
| E1-034    | Institute of Earth Sciences, Heidelberg University | 3.86        | 27.75      | 1922.25       | 19.17            | -9.65                             | -4.05                             |
| E1-035    | Institute of Earth Sciences, Heidelberg University | 3.96        | 28.22      | 1921.78       | 19.09            | -10.42                            | -4.36                             |
| E1-036    | Institute of Earth Sciences, Heidelberg University | 4.06        | 28.68      | 1921.32       | 18.98            | -10.30                            | -4.34                             |
| E1-037    | Institute of Earth Sciences, Heidelberg University | 4.16        | 29.17      | 1920.83       | 18.80            | -10.57                            | -4.57                             |
| E1-038    | Institute of Earth Sciences, Heidelberg University | 4.26        | 29.62      | 1920.38       | 18.74            | -10.28                            | -4.36                             |
| E1-039    | Institute of Earth Sciences, Heidelberg University | 4.36        | 30.09      | 1919.91       | 18.69            | -11.11                            | -4.51                             |
| E1-040    | Institute of Earth Sciences, Heidelberg University | 4.46        | 30.54      | 1919.46       | 18.62            | -11.20                            | -4.53                             |
| E1-041    | Institute of Earth Sciences, Heidelberg University | 4.56        | 31.02      | 1918.98       | 18.55            | -11.22                            | -4.50                             |
| E1-042    | Institute of Earth Sciences, Heidelberg University | 4.66        | 31.47      | 1918.53       | 18.44            | -10.79                            | -4.50                             |
| E1-043    | Institute of Earth Sciences, Heidelberg University | 4.76        | 31.95      | 1918.05       | 18.35            | -10.62                            | -4.55                             |
| E1-044    | Institute of Earth Sciences, Heidelberg University | 4.86        | 32.43      | 1917.57       | 18.28            | -10.93                            | -4.72                             |
| E1-045    | Institute of Earth Sciences, Heidelberg University | 4.96        | 32.88      | 1917.12       | 18.21            | -11.14                            | -4.65                             |
| E1-046    | Institute of Earth Sciences, Heidelberg University | 5.06        | 33.38      | 1916.62       | 18.12            | -11.78                            | -4.86                             |
| E1-047    | Institute of Earth Sciences, Heidelberg University | 5.16        | 33.86      | 1916.14       | 18.06            | -11.39                            | -4.69                             |
| E1-048    | Institute of Earth Sciences, Heidelberg University | 5.26        | 34.43      | 1915.57       | 18.01            | -10.15                            | -4.33                             |
| E1-049    | Institute of Earth Sciences, Heidelberg University | 5.36        | 34.90      | 1915.10       | 17.89            | -10.29                            | -4.42                             |
| E1-050    | Institute of Earth Sciences, Heidelberg University | 5.46        | 35.33      | 1914.67       | 17.82            | -10.10                            | -4.30                             |
| E1-051    | Institute of Earth Sciences, Heidelberg University | 5.56        | 35.77      | 1914.23       | 17.76            | -10.66                            | -4.73                             |
| E1-052    | Institute of Earth Sciences, Heidelberg University | 5.66        | 36.23      | 1913.77       | 17.69            | -11.41                            | -4.87                             |
| E1-053    | Institute of Earth Sciences, Heidelberg University | 5.76        | 36.71      | 1913.29       | 17.61            | -11.13                            | -4.73                             |
| E1-054    | Institute of Earth Sciences, Heidelberg University | 5.86        | 37.18      | 1912.82       | 17.52            | -10.58                            | -4.42                             |
| E1-055    | Institute of Earth Sciences, Heidelberg University | 5.96        | 37.63      | 1912.37       | 17.46            | -11.31                            | -4.66                             |
| E1-056    | Institute of Earth Sciences, Heidelberg University | 6.06        | 38.10      | 1911.90       | 17.38            | -11.74                            | -4.90                             |
| E1-057    | Institute of Earth Sciences, Heidelberg University | 6.16        | 38.54      | 1911.46       | 17.31            | -11.67                            | -4.88                             |
| E1-058    | Institute of Earth Sciences, Heidelberg University | 6.26        | 39.10      | 1910.90       | 17.26            | -11.61                            | -4.77                             |
| E1-059    | Institute of Earth Sciences, Heidelberg University | 6.36        | 39.56      | 1910.44       | 17.17            | -11.72                            | -4.88                             |
| E1-060    | Institute of Earth Sciences, Heidelberg University | 6.46        | 40.08      | 1909.92       | 17.11            | -11.65                            | -4.87                             |
| E1-061    | Institute of Earth Sciences, Heidelberg University | 6.56        | 40.61      | 1909.39       | 16.95            | -11.77                            | -4.90                             |
| E1-062    | Institute of Earth Sciences, Heidelberg University | 6.66        | 41.09      | 1908.91       | 16.89            | -11.94                            | -4.88                             |
| E1-063    | Institute of Earth Sciences, Heidelberg University | 6.76        | 41.55      | 1908.45       | 16.79            | -11.90                            | -4.95                             |
| E1-064    | Institute of Earth Sciences, Heidelberg University | 6.86        | 42.02      | 1907.98       | 16.66            | -12.04                            | -5.11                             |
| E1-065    | Institute of Earth Sciences, Heidelberg University | 6.96        | 42.57      | 1907.43       | 16.54            | -11.91                            | -5.21                             |
| E1-066    | Institute of Earth Sciences, Heidelberg University | 7.06        | 43.03      | 1906.97       | 16.48            | -11.63                            | -5.19                             |
| E1-067    | Institute of Earth Sciences, Heidelberg University | 7.16        | 43.53      | 1906.47       | 16.44            | -11.22                            | -5.08                             |
| E1-068    | Institute of Earth Sciences, Heidelberg University | 7.26        | 44.06      | 1905.94       | 16.41            | -11.60                            | -5.20                             |
| E1-069    | Institute of Earth Sciences, Heidelberg University | 7.36        | 44.56      | 1905.44       | 16.30            | -11.37                            | -5.10                             |
| E1-070    | Institute of Earth Sciences, Heidelberg University | 7.46        | 45.08      | 1904.92       | 16.16            | -11.41                            | -4.97                             |
| E1-071    | Institute of Earth Sciences, Heidelberg University | 7.71        | 46.39      | 1903.61       | 16.01            | -11.04                            | -4.90                             |
| E1-072    | Institute of Earth Sciences, Heidelberg University | 7.96        | 47.62      | 1902.38       | 15.79            | -9.98                             | -4.56                             |
| E1-073    | Institute of Earth Sciences, Heidelberg University | 8.21        | 48.94      | 1901.06       | 15.49            | -10.88                            | -4.77                             |
| E1-074    | Institute of Earth Sciences, Heidelberg University | 8.46        | 50.21      | 1899.79       | 15.32            | -11.50                            | -4.72                             |

|        |                                                    |       |        |         |       |        |       |
|--------|----------------------------------------------------|-------|--------|---------|-------|--------|-------|
| E1-075 | Institute of Earth Sciences, Heidelberg University | 8.71  | 51.47  | 1898.53 | 15.09 | -11.54 | -4.71 |
| E1-076 | Institute of Earth Sciences, Heidelberg University | 8.96  | 52.77  | 1897.23 | 14.85 | -11.73 | -4.67 |
| E1-078 | Institute of Earth Sciences, Heidelberg University | 9.46  | 55.53  | 1894.47 | 14.73 | -11.26 | -4.47 |
| E1-079 | Institute of Earth Sciences, Heidelberg University | 9.71  | 56.99  | 1893.01 | 14.80 | -11.32 | -4.65 |
| E1-080 | Institute of Earth Sciences, Heidelberg University | 9.96  | 58.57  | 1891.43 | 15.00 | -11.44 | -4.66 |
| E1-081 | Institute of Earth Sciences, Heidelberg University | 10.21 | 60.13  | 1889.87 | 14.97 | -11.09 | -4.62 |
| E1-082 | Institute of Earth Sciences, Heidelberg University | 10.46 | 61.61  | 1888.39 | 14.81 | -11.28 | -4.65 |
| E1-083 | Institute of Earth Sciences, Heidelberg University | 10.71 | 63.24  | 1886.76 | 14.73 | -11.22 | -4.70 |
| E1-084 | Institute of Earth Sciences, Heidelberg University | 10.96 | 64.77  | 1885.23 | 14.56 | -11.07 | -4.65 |
| E1-085 | Institute of Earth Sciences, Heidelberg University | 11.21 | 66.50  | 1883.50 | 14.31 | -10.95 | -4.43 |
| E1-086 | Institute of Earth Sciences, Heidelberg University | 11.46 | 68.18  | 1881.82 | 14.05 | -10.96 | -4.50 |
| E1-087 | Institute of Earth Sciences, Heidelberg University | 11.71 | 69.92  | 1880.08 | 13.80 | -11.42 | -4.58 |
| E1-088 | Institute of Earth Sciences, Heidelberg University | 11.96 | 71.74  | 1878.26 | 13.58 | -11.42 | -4.53 |
| E1-089 | Institute of Earth Sciences, Heidelberg University | 12.21 | 73.59  | 1876.41 | 13.35 | -11.29 | -4.75 |
| E1-090 | Institute of Earth Sciences, Heidelberg University | 12.46 | 75.38  | 1874.62 | 13.15 | -11.21 | -4.63 |
| E1-091 | Institute of Earth Sciences, Heidelberg University | 12.71 | 77.25  | 1872.75 | 13.00 | -11.24 | -4.62 |
| E1-092 | Institute of Earth Sciences, Heidelberg University | 12.96 | 79.08  | 1870.92 | 12.92 | -11.16 | -4.50 |
| E1-093 | Institute of Earth Sciences, Heidelberg University | 13.21 | 80.90  | 1869.10 | 12.84 | -11.28 | -4.51 |
| E1-094 | Institute of Earth Sciences, Heidelberg University | 13.46 | 82.73  | 1867.27 | 12.84 | -11.32 | -4.54 |
| E1-095 | Institute of Earth Sciences, Heidelberg University | 13.71 | 84.57  | 1865.43 | 12.81 | -11.15 | -4.41 |
| E1-096 | Institute of Earth Sciences, Heidelberg University | 13.96 | 86.40  | 1863.60 | 12.77 | -11.08 | -4.65 |
| E1-097 | Institute of Earth Sciences, Heidelberg University | 14.21 | 88.22  | 1861.78 | 12.66 | -11.46 | -4.47 |
| E1-098 | Institute of Earth Sciences, Heidelberg University | 14.46 | 90.00  | 1860.00 | 12.61 | -11.32 | -4.31 |
| E1-099 | Institute of Earth Sciences, Heidelberg University | 14.71 | 91.77  | 1858.23 | 12.58 | -11.47 | -4.41 |
| E1-100 | Institute of Earth Sciences, Heidelberg University | 14.96 | 93.55  | 1856.45 | 12.50 | -11.23 | -5.28 |
| E1-101 | Institute of Earth Sciences, Heidelberg University | 15.21 | 95.31  | 1854.69 | 12.44 | -10.34 | -4.45 |
| E1-102 | Institute of Earth Sciences, Heidelberg University | 15.46 | 97.10  | 1852.90 | 12.39 | -9.92  | -4.31 |
| E1-103 | Institute of Earth Sciences, Heidelberg University | 15.71 | 98.83  | 1851.17 | 12.34 | -9.72  | -4.32 |
| E1-104 | Institute of Earth Sciences, Heidelberg University | 15.96 | 100.59 | 1849.41 | 12.26 | -9.47  | -4.66 |
| E1-105 | Institute of Earth Sciences, Heidelberg University | 16.21 | 102.32 | 1847.68 | 12.17 | -9.65  | -4.87 |
| E1-106 | Institute of Earth Sciences, Heidelberg University | 16.46 | 104.06 | 1845.94 | 12.09 | -9.67  | -4.94 |
| E1-107 | Institute of Earth Sciences, Heidelberg University | 16.71 | 105.77 | 1844.23 | 12.00 | -9.32  | -4.80 |
| E1-108 | Institute of Earth Sciences, Heidelberg University | 16.96 | 107.51 | 1842.49 | 11.93 | -9.35  | -4.71 |
| E1-109 | Institute of Earth Sciences, Heidelberg University | 17.21 | 109.21 | 1840.79 | 11.86 | -9.46  | -4.89 |
| E1-110 | Institute of Earth Sciences, Heidelberg University | 17.46 | 110.93 | 1839.07 | 11.81 | -9.11  | -4.88 |
| E1-111 | Institute of Earth Sciences, Heidelberg University | 17.71 | 112.60 | 1837.40 | 11.76 | -9.35  | -5.08 |
| E1-112 | Institute of Earth Sciences, Heidelberg University | 17.96 | 114.33 | 1835.67 | 11.72 | -9.38  | -4.99 |
| E1-113 | Institute of Earth Sciences, Heidelberg University | 18.21 | 116.01 | 1833.99 | 11.67 | -9.28  | -4.65 |
| E1-114 | Institute of Earth Sciences, Heidelberg University | 18.46 | 117.65 | 1832.35 | 11.64 | -9.25  | -4.81 |
| E1-115 | Institute of Earth Sciences, Heidelberg University | 18.71 | 119.31 | 1830.69 | 11.62 | -9.42  | -4.80 |
| E1-116 | Institute of Earth Sciences, Heidelberg University | 18.96 | 120.99 | 1829.01 | 11.57 | -9.15  | -5.11 |
| E1-117 | Institute of Earth Sciences, Heidelberg University | 19.21 | 122.60 | 1827.40 | 11.52 | -9.20  | -4.54 |
| E1-118 | Institute of Earth Sciences, Heidelberg University | 19.46 | 124.19 | 1825.81 | 11.49 | -8.82  | -4.22 |
| E1-119 | Institute of Earth Sciences, Heidelberg University | 19.71 | 125.73 | 1824.27 | 11.46 | -9.01  | -4.38 |
| E1-120 | Institute of Earth Sciences, Heidelberg University | 19.96 | 127.27 | 1822.73 | 11.43 | -9.04  | -4.31 |
| E1-121 | Institute of Earth Sciences, Heidelberg University | 20.21 | 128.79 | 1821.21 | 11.40 | -8.90  | -4.39 |
| E1-122 | Institute of Earth Sciences, Heidelberg University | 20.46 | 130.32 | 1819.68 | 11.39 | -8.91  | -4.36 |
| E1-123 | Institute of Earth Sciences, Heidelberg University | 20.71 | 131.83 | 1818.17 | 11.34 | -9.51  | -4.64 |
| E1-124 | Institute of Earth Sciences, Heidelberg University | 20.96 | 133.24 | 1816.76 | 11.25 | -9.35  | -4.89 |
| E1-125 | Institute of Earth Sciences, Heidelberg University | 21.21 | 134.70 | 1815.30 | 11.20 | -9.23  | -4.52 |
| E1-126 | Institute of Earth Sciences, Heidelberg University | 21.46 | 136.12 | 1813.88 | 11.10 | -9.45  | -4.53 |
| E1-127 | Institute of Earth Sciences, Heidelberg University | 21.71 | 137.37 | 1812.63 | 11.04 | -9.61  | -4.57 |
| E1-128 | Institute of Earth Sciences, Heidelberg University | 21.96 | 138.59 | 1811.41 | 10.96 | -9.56  | -4.77 |
| E1-129 | Institute of Earth Sciences, Heidelberg University | 22.21 | 139.89 | 1810.11 | 10.73 | -9.93  | -4.91 |
| E1-130 | Institute of Earth Sciences, Heidelberg University | 22.46 | 141.07 | 1808.93 | 10.52 | -9.51  | -4.77 |
| E1-131 | Institute of Earth Sciences, Heidelberg University | 22.71 | 142.30 | 1807.70 | 10.29 | -9.64  | -4.83 |
| E1-133 | Institute of Earth Sciences, Heidelberg University | 23.21 | 145.18 | 1804.82 | 9.48  | -9.26  | -4.68 |
| E1-134 | Institute of Earth Sciences, Heidelberg University | 23.46 | 146.76 | 1803.24 | 8.91  | -8.94  | -4.75 |
| E1-135 | Institute of Earth Sciences, Heidelberg University | 23.71 | 148.45 | 1801.55 | 8.20  | -8.66  | -4.38 |
| E1-136 | Institute of Earth Sciences, Heidelberg University | 23.96 | 150.48 | 1799.52 | 6.94  | -9.58  | -4.48 |
| E1-137 | Institute of Earth Sciences, Heidelberg University | 24.21 | 151.52 | 1798.48 | 6.47  | -9.41  | -4.29 |
| E1-138 | Institute of Earth Sciences, Heidelberg University | 24.46 | 152.10 | 1797.90 | 6.52  | -9.64  | -4.24 |
| E1-139 | Institute of Earth Sciences, Heidelberg University | 24.71 | 152.29 | 1797.71 | 7.10  | -9.72  | -4.36 |
| E1-140 | Institute of Earth Sciences, Heidelberg University | 24.96 | 152.45 | 1797.55 | 7.83  | -10.18 | -4.61 |
| E1-141 | Institute of Earth Sciences, Heidelberg University | 25.21 | 153.04 | 1796.96 | 7.98  | -10.01 | -4.99 |
| E1-142 | Institute of Earth Sciences, Heidelberg University | 25.46 | 153.44 | 1796.56 | 8.45  | -10.14 | -4.99 |
| E1-143 | Institute of Earth Sciences, Heidelberg University | 25.71 | 154.05 | 1795.95 | 8.75  | -10.30 | -4.90 |
| E1-144 | Institute of Earth Sciences, Heidelberg University | 25.96 | 154.76 | 1795.24 | 8.83  | -10.07 | -4.88 |
| E1-145 | Institute of Earth Sciences, Heidelberg University | 26.21 | 155.54 | 1794.46 | 8.91  | -10.33 | -5.03 |
| E1-146 | Institute of Earth Sciences, Heidelberg University | 26.46 | 156.31 | 1793.69 | 9.05  | -10.07 | -5.02 |
| E1-147 | Institute of Earth Sciences, Heidelberg University | 26.71 | 157.29 | 1792.71 | 9.02  | -10.46 | -5.38 |
| E1-148 | Institute of Earth Sciences, Heidelberg University | 26.96 | 158.30 | 1791.70 | 9.02  | -10.29 | -5.64 |
| E1-149 | Institute of Earth Sciences, Heidelberg University | 27.21 | 159.40 | 1790.60 | 8.95  | -10.06 | -5.63 |
| E1-150 | Institute of Earth Sciences, Heidelberg University | 27.46 | 160.60 | 1789.40 | 8.90  | -10.25 | -5.42 |
| E1-151 | Institute of Earth Sciences, Heidelberg University | 27.71 | 161.83 | 1788.17 | 8.80  | -10.13 | -5.33 |
| E1-152 | Institute of Earth Sciences, Heidelberg University | 27.96 | 163.06 | 1786.94 | 8.73  | -9.90  | -5.15 |
| E1-154 | Institute of Earth Sciences, Heidelberg University | 28.46 | 165.54 | 1784.46 | 8.67  | -9.91  | -5.23 |
| E1-155 | Institute of Earth Sciences, Heidelberg University | 28.71 | 166.73 | 1783.27 | 8.73  | -9.99  | -5.27 |
| E1-156 | Institute of Earth Sciences, Heidelberg University | 28.96 | 168.03 | 1781.97 | 8.66  | -9.77  | -5.25 |
| E1-158 | Institute of Earth Sciences, Heidelberg University | 29.46 | 170.58 | 1779.42 | 8.57  | -9.65  | -5.16 |

|        |                                                    |       |        |         |       |        |       |
|--------|----------------------------------------------------|-------|--------|---------|-------|--------|-------|
| E1-159 | Institute of Earth Sciences, Heidelberg University | 29.71 | 171.83 | 1778.17 | 8.58  | -9.15  | -4.50 |
| E1-160 | Institute of Earth Sciences, Heidelberg University | 29.96 | 172.95 | 1777.05 | 8.62  | -9.63  | -4.66 |
| E1-161 | Institute of Earth Sciences, Heidelberg University | 30.21 | 174.10 | 1775.90 | 8.72  | -8.96  | -4.35 |
| E1-162 | Institute of Earth Sciences, Heidelberg University | 30.46 | 175.27 | 1774.73 | 8.76  | -9.75  | -4.78 |
| E1-163 | Institute of Earth Sciences, Heidelberg University | 30.71 | 176.29 | 1773.71 | 8.79  | -10.13 | -4.81 |
| E1-165 | Institute of Earth Sciences, Heidelberg University | 31.21 | 178.46 | 1771.54 | 8.69  | -10.15 | -4.50 |
| E1-166 | Institute of Earth Sciences, Heidelberg University | 31.46 | 179.61 | 1770.39 | 8.48  | -10.22 | -4.37 |
| E1-167 | Institute of Earth Sciences, Heidelberg University | 31.71 | 180.71 | 1769.29 | 8.31  | -10.55 | -4.44 |
| E1-168 | Institute of Earth Sciences, Heidelberg University | 31.96 | 181.88 | 1768.12 | 8.13  | -10.90 | -4.96 |
| E1-169 | Institute of Earth Sciences, Heidelberg University | 32.21 | 182.97 | 1767.03 | 7.93  | -10.96 | -5.08 |
| E1-170 | Institute of Earth Sciences, Heidelberg University | 32.46 | 184.16 | 1765.84 | 7.67  | -10.74 | -5.28 |
| E1-171 | Institute of Earth Sciences, Heidelberg University | 32.71 | 185.45 | 1764.55 | 7.33  | -10.05 | -5.42 |
| E1-172 | Institute of Earth Sciences, Heidelberg University | 32.96 | 186.59 | 1763.41 | 7.15  | -9.77  | -4.99 |
| E1-175 | Institute of Earth Sciences, Heidelberg University | 33.71 | 190.03 | 1759.97 | 6.66  | -10.10 | -4.26 |
| E1-176 | Institute of Earth Sciences, Heidelberg University | 33.96 | 191.01 | 1758.99 | 6.64  | -9.91  | -4.04 |
| E1-180 | Institute of Earth Sciences, Heidelberg University | 34.96 | 194.61 | 1755.39 | 6.62  | -10.72 | -4.42 |
| E1-181 | Institute of Earth Sciences, Heidelberg University | 35.21 | 195.41 | 1754.59 | 6.53  | -10.77 | -4.47 |
| E1-182 | Institute of Earth Sciences, Heidelberg University | 35.46 | 196.11 | 1753.89 | 6.40  | -11.07 | -4.72 |
| E1-183 | Institute of Earth Sciences, Heidelberg University | 35.71 | 196.82 | 1753.18 | 6.14  | -11.19 | -4.85 |
| E1-184 | Institute of Earth Sciences, Heidelberg University | 35.96 | 197.56 | 1752.44 | 5.93  | -11.00 | -5.40 |
| E1-185 | Institute of Earth Sciences, Heidelberg University | 36.21 | 198.21 | 1751.79 | 5.73  | -10.96 | -5.94 |
| E1-186 | Institute of Earth Sciences, Heidelberg University | 36.46 | 198.94 | 1751.06 | 5.56  | -11.00 | -6.15 |
| E1-187 | Institute of Earth Sciences, Heidelberg University | 36.71 | 199.60 | 1750.40 | 5.39  | -10.58 | -6.07 |
| E1-188 | Institute of Earth Sciences, Heidelberg University | 36.96 | 200.32 | 1749.68 | 5.35  | -10.49 | -6.24 |
| E1-189 | Institute of Earth Sciences, Heidelberg University | 37.21 | 201.07 | 1748.93 | 5.44  | -10.13 | -5.98 |
| E1-190 | Institute of Earth Sciences, Heidelberg University | 37.46 | 201.88 | 1748.12 | 5.67  | -9.88  | -5.73 |
| E1-191 | Institute of Earth Sciences, Heidelberg University | 37.71 | 202.65 | 1747.35 | 5.85  | -9.96  | -5.96 |
| E1-192 | Institute of Earth Sciences, Heidelberg University | 37.96 | 203.42 | 1746.58 | 5.92  | -10.03 | -5.98 |
| E1-193 | Institute of Earth Sciences, Heidelberg University | 38.21 | 204.26 | 1745.74 | 6.17  | -9.71  | -5.94 |
| E1-194 | Institute of Earth Sciences, Heidelberg University | 38.46 | 205.04 | 1744.96 | 6.30  | -10.09 | -5.74 |
| E1-195 | Institute of Earth Sciences, Heidelberg University | 38.71 | 205.85 | 1744.15 | 6.44  | -10.46 | -5.33 |
| E1-196 | Institute of Earth Sciences, Heidelberg University | 38.96 | 206.73 | 1743.27 | 6.64  | -10.30 | -5.10 |
| E1-197 | Institute of Earth Sciences, Heidelberg University | 39.21 | 207.66 | 1742.34 | 6.65  | -9.73  | -4.89 |
| E1-199 | Institute of Earth Sciences, Heidelberg University | 39.71 | 209.66 | 1740.34 | 6.71  | -9.94  | -4.32 |
| E1-200 | Institute of Earth Sciences, Heidelberg University | 39.96 | 210.72 | 1739.28 | 6.76  | -10.84 | -4.55 |
| E1-201 | Institute of Earth Sciences, Heidelberg University | 40.21 | 211.74 | 1738.26 | 6.77  | -10.79 | -5.41 |
| E1-202 | Institute of Earth Sciences, Heidelberg University | 40.46 | 212.80 | 1737.20 | 6.78  | -10.40 | -5.36 |
| E1-203 | Institute of Earth Sciences, Heidelberg University | 40.71 | 213.87 | 1736.13 | 6.78  | -10.36 | -5.17 |
| E1-204 | Institute of Earth Sciences, Heidelberg University | 40.96 | 214.94 | 1735.06 | 6.80  | -10.19 | -4.94 |
| E1-205 | Institute of Earth Sciences, Heidelberg University | 41.21 | 216.01 | 1733.99 | 6.83  | -10.12 | -4.41 |
| E1-206 | Institute of Earth Sciences, Heidelberg University | 41.46 | 217.14 | 1732.86 | 6.86  | -10.19 | -4.41 |
| E1-207 | Institute of Earth Sciences, Heidelberg University | 41.71 | 218.25 | 1731.75 | 6.91  | -10.30 | -4.20 |
| E1-208 | Institute of Earth Sciences, Heidelberg University | 41.96 | 219.35 | 1730.65 | 6.97  | -10.22 | -4.18 |
| E1-209 | Institute of Earth Sciences, Heidelberg University | 42.21 | 220.48 | 1729.52 | 7.06  | -10.27 | -4.27 |
| E1-210 | Institute of Earth Sciences, Heidelberg University | 42.46 | 221.68 | 1728.32 | 7.18  | -10.37 | -4.33 |
| E1-211 | Institute of Earth Sciences, Heidelberg University | 42.71 | 222.80 | 1727.20 | 7.32  | -10.55 | -4.30 |
| E1-212 | Institute of Earth Sciences, Heidelberg University | 42.96 | 223.98 | 1726.02 | 7.47  | -10.89 | -4.46 |
| E1-213 | Institute of Earth Sciences, Heidelberg University | 43.21 | 225.14 | 1724.86 | 7.62  | -10.99 | -4.60 |
| E1-215 | Institute of Earth Sciences, Heidelberg University | 43.71 | 227.46 | 1722.54 | 8.01  | -10.92 | -4.80 |
| E1-216 | Institute of Earth Sciences, Heidelberg University | 43.96 | 228.64 | 1721.36 | 8.20  | -11.01 | -5.00 |
| E1-217 | Institute of Earth Sciences, Heidelberg University | 44.21 | 229.83 | 1720.17 | 8.42  | -10.82 | -4.97 |
| E1-219 | Institute of Earth Sciences, Heidelberg University | 44.71 | 232.26 | 1717.74 | 8.84  | -10.74 | -5.12 |
| E1-220 | Institute of Earth Sciences, Heidelberg University | 44.96 | 233.46 | 1716.54 | 9.03  | -10.98 | -5.19 |
| E1-221 | Institute of Earth Sciences, Heidelberg University | 45.21 | 234.65 | 1715.35 | 9.25  | -10.80 | -5.16 |
| E1-222 | Institute of Earth Sciences, Heidelberg University | 45.46 | 235.84 | 1714.16 | 9.46  | -10.30 | -4.87 |
| E1-223 | Institute of Earth Sciences, Heidelberg University | 45.71 | 237.03 | 1712.97 | 9.65  | -10.29 | -4.65 |
| E1-224 | Institute of Earth Sciences, Heidelberg University | 45.96 | 238.17 | 1711.83 | 9.82  | -10.39 | -4.76 |
| E1-225 | Institute of Earth Sciences, Heidelberg University | 46.21 | 239.35 | 1710.65 | 10.01 | -10.30 | -4.87 |
| E1-226 | Institute of Earth Sciences, Heidelberg University | 46.46 | 240.57 | 1709.43 | 10.19 | -10.35 | -4.88 |
| E1-227 | Institute of Earth Sciences, Heidelberg University | 46.71 | 241.71 | 1708.29 | 10.39 | -10.64 | -5.16 |
| E1-228 | Institute of Earth Sciences, Heidelberg University | 46.96 | 242.89 | 1707.11 | 10.59 | -10.36 | -5.09 |
| E1-229 | Institute of Earth Sciences, Heidelberg University | 47.21 | 244.08 | 1705.92 | 10.80 | -10.55 | -5.18 |
| E1-230 | Institute of Earth Sciences, Heidelberg University | 47.46 | 245.26 | 1704.74 | 11.00 | -10.40 | -5.32 |
| E1-231 | Institute of Earth Sciences, Heidelberg University | 47.71 | 246.44 | 1703.56 | 11.18 | -10.58 | -5.10 |
| E1-232 | Institute of Earth Sciences, Heidelberg University | 47.96 | 247.60 | 1702.40 | 11.29 | -10.77 | -5.55 |
| E1-233 | Institute of Earth Sciences, Heidelberg University | 48.21 | 248.69 | 1701.31 | 11.40 | -10.78 | -5.48 |
| E1-234 | Institute of Earth Sciences, Heidelberg University | 48.46 | 249.71 | 1700.29 | 11.50 | -11.04 | -5.54 |
| E1-235 | Institute of Earth Sciences, Heidelberg University | 48.71 | 250.67 | 1699.33 | 11.41 | -10.61 | -5.41 |
| E1-236 | Institute of Earth Sciences, Heidelberg University | 48.96 | 251.59 | 1698.41 | 11.40 | -11.23 | -5.79 |
| E1-240 | Institute of Earth Sciences, Heidelberg University | 49.96 | 254.15 | 1695.85 | 9.38  | -10.47 | -5.03 |
| E1-243 | Institute of Earth Sciences, Heidelberg University | 50.71 | 254.61 | 1695.39 | 6.71  | -10.44 | -5.58 |
| E1-244 | Institute of Earth Sciences, Heidelberg University | 50.96 | 254.95 | 1695.05 | 6.39  | -10.57 | -5.57 |
| E1-245 | Institute of Earth Sciences, Heidelberg University | 51.21 | 255.44 | 1694.56 | 6.47  | -10.52 | -5.46 |
| E1-246 | Institute of Earth Sciences, Heidelberg University | 51.46 | 256.00 | 1694.00 | 6.64  | -10.92 | -5.66 |
| E1-247 | Institute of Earth Sciences, Heidelberg University | 51.71 | 256.64 | 1693.36 | 7.10  | -10.50 | -5.58 |
| E1-248 | Institute of Earth Sciences, Heidelberg University | 51.96 | 257.78 | 1692.22 | 8.34  | -10.67 | -5.39 |
| E1-249 | Institute of Earth Sciences, Heidelberg University | 52.21 | 259.15 | 1690.85 | 9.69  | -10.65 | -5.27 |
| E1-250 | Institute of Earth Sciences, Heidelberg University | 52.46 | 261.37 | 1688.63 | 11.90 | -10.77 | -5.43 |
| E1-251 | Institute of Earth Sciences, Heidelberg University | 52.71 | 263.13 | 1686.87 | 13.10 | -10.80 | -5.51 |
| E1-252 | Institute of Earth Sciences, Heidelberg University | 52.96 | 264.89 | 1685.11 | 14.23 | -10.62 | -5.41 |

|        |                                                    |       |        |         |       |        |       |
|--------|----------------------------------------------------|-------|--------|---------|-------|--------|-------|
| E1-253 | Institute of Earth Sciences, Heidelberg University | 53.21 | 266.43 | 1683.57 | 15.11 | -10.75 | -5.21 |
| E1-254 | Institute of Earth Sciences, Heidelberg University | 53.46 | 267.72 | 1682.28 | 15.66 | -10.56 | -4.94 |
| E1-255 | Institute of Earth Sciences, Heidelberg University | 53.71 | 268.88 | 1681.12 | 16.06 | -10.69 | -4.43 |
| E1-256 | Institute of Earth Sciences, Heidelberg University | 53.96 | 270.40 | 1679.60 | 16.69 | -11.18 | -5.24 |
| E1-257 | Institute of Earth Sciences, Heidelberg University | 54.21 | 271.81 | 1678.19 | 16.92 | -11.30 | -5.24 |
| E1-258 | Institute of Earth Sciences, Heidelberg University | 54.46 | 273.31 | 1676.69 | 16.98 | -10.81 | -5.11 |
| E1-259 | Institute of Earth Sciences, Heidelberg University | 54.71 | 274.98 | 1675.02 | 17.13 | -11.14 | -5.02 |
| E1-260 | Institute of Earth Sciences, Heidelberg University | 54.96 | 276.63 | 1673.37 | 17.13 | -11.30 | -5.10 |
| E1-261 | Institute of Earth Sciences, Heidelberg University | 55.21 | 278.34 | 1671.66 | 17.19 | -11.02 | -4.97 |
| E1-262 | Institute of Earth Sciences, Heidelberg University | 55.46 | 280.25 | 1669.75 | 17.42 | -11.08 | -5.11 |
| E1-263 | Institute of Earth Sciences, Heidelberg University | 55.71 | 282.00 | 1668.00 | 17.65 | -10.88 | -5.15 |
| E1-264 | Institute of Earth Sciences, Heidelberg University | 55.96 | 283.83 | 1666.17 | 17.83 | -11.14 | -5.18 |
| E1-266 | Institute of Earth Sciences, Heidelberg University | 56.46 | 287.62 | 1662.38 | 18.07 | -10.94 | -5.27 |
| E1-267 | Institute of Earth Sciences, Heidelberg University | 56.71 | 289.58 | 1660.42 | 18.25 | -11.14 | -5.17 |
| E1-268 | Institute of Earth Sciences, Heidelberg University | 56.96 | 291.58 | 1658.42 | 18.56 | -10.75 | -5.28 |
| E1-269 | Institute of Earth Sciences, Heidelberg University | 57.21 | 293.70 | 1656.30 | 19.01 | -10.85 | -5.09 |
| E1-270 | Institute of Earth Sciences, Heidelberg University | 57.46 | 295.59 | 1654.41 | 19.37 | -11.02 | -5.01 |
| E1-271 | Institute of Earth Sciences, Heidelberg University | 57.71 | 297.39 | 1652.61 | 19.83 | -11.29 | -4.88 |
| E1-272 | Institute of Earth Sciences, Heidelberg University | 57.96 | 299.24 | 1650.76 | 20.45 | -11.38 | -5.00 |
| E1-273 | Institute of Earth Sciences, Heidelberg University | 58.21 | 300.95 | 1649.05 | 20.86 | -11.38 | -4.97 |
| E1-274 | Institute of Earth Sciences, Heidelberg University | 58.46 | 302.65 | 1647.35 | 21.29 | -12.41 | -7.14 |
| E1-275 | Institute of Earth Sciences, Heidelberg University | 58.71 | 304.18 | 1645.82 | 21.74 | -11.64 | -4.78 |
| E1-277 | Institute of Earth Sciences, Heidelberg University | 59.21 | 307.23 | 1642.77 | 22.69 | -11.92 | -4.87 |
| E1-279 | Institute of Earth Sciences, Heidelberg University | 59.71 | 309.69 | 1640.31 | 23.40 | -11.79 | -4.83 |
| E1-283 | Institute of Earth Sciences, Heidelberg University | 61.7  | 375.07 | 1574.93 | 40.65 | -11.82 | -4.82 |
| E1-284 | Institute of Earth Sciences, Heidelberg University | 61.95 | 375.98 | 1574.02 | 40.28 | -11.50 | -4.55 |
| E1-285 | Institute of Earth Sciences, Heidelberg University | 62.2  | 376.95 | 1573.05 | 39.80 | -11.50 | -4.93 |
| E1-286 | Institute of Earth Sciences, Heidelberg University | 62.45 | 377.86 | 1572.14 | 39.22 | -10.63 | -4.98 |
| E1-287 | Institute of Earth Sciences, Heidelberg University | 62.7  | 378.82 | 1571.18 | 38.84 | -10.67 | -4.99 |
| E1-288 | Institute of Earth Sciences, Heidelberg University | 62.95 | 379.73 | 1570.27 | 38.54 | -11.15 | -5.31 |
| E1-289 | Institute of Earth Sciences, Heidelberg University | 63.2  | 380.67 | 1569.33 | 38.20 | -11.22 | -5.48 |
| E1-290 | Institute of Earth Sciences, Heidelberg University | 63.45 | 381.57 | 1568.43 | 37.79 | -11.63 | -5.65 |
| E1-291 | Institute of Earth Sciences, Heidelberg University | 63.7  | 382.45 | 1567.55 | 37.31 | -11.77 | -5.62 |
| E1-292 | Institute of Earth Sciences, Heidelberg University | 63.95 | 383.31 | 1566.69 | 37.02 | -11.76 | -5.88 |
| E1-293 | Institute of Earth Sciences, Heidelberg University | 64.2  | 384.22 | 1565.78 | 36.60 | -11.44 | -5.69 |
| E1-294 | Institute of Earth Sciences, Heidelberg University | 64.45 | 385.06 | 1564.94 | 36.19 | -11.44 | -5.48 |
| E1-295 | Institute of Earth Sciences, Heidelberg University | 64.7  | 386.21 | 1563.79 | 35.53 | -11.14 | -5.57 |
| E1-296 | Institute of Earth Sciences, Heidelberg University | 64.95 | 387.18 | 1562.82 | 35.13 | -10.96 | -5.63 |
| E1-297 | Institute of Earth Sciences, Heidelberg University | 65.2  | 387.95 | 1562.05 | 34.72 | -10.89 | -5.64 |
| E1-298 | Institute of Earth Sciences, Heidelberg University | 65.45 | 388.88 | 1561.12 | 34.28 | -10.71 | -5.07 |
| E1-299 | Institute of Earth Sciences, Heidelberg University | 65.7  | 389.67 | 1560.33 | 33.99 | -10.87 | -5.10 |
| E1-300 | Institute of Earth Sciences, Heidelberg University | 65.95 | 390.56 | 1559.44 | 33.76 | -10.63 | -5.13 |
| E1-301 | Institute of Earth Sciences, Heidelberg University | 66.2  | 391.37 | 1558.63 | 33.45 | -10.78 | -5.45 |
| E1-302 | Institute of Earth Sciences, Heidelberg University | 66.45 | 392.22 | 1557.78 | 33.15 | -10.97 | -5.55 |
| E1-303 | Institute of Earth Sciences, Heidelberg University | 66.7  | 393.00 | 1557.00 | 32.80 | -10.70 | -5.55 |
| E1-305 | Institute of Earth Sciences, Heidelberg University | 67.2  | 394.78 | 1555.22 | 31.98 | -9.85  | -5.68 |
| E1-306 | Institute of Earth Sciences, Heidelberg University | 67.45 | 395.71 | 1554.29 | 31.54 | -10.35 | -5.81 |
| E1-307 | Institute of Earth Sciences, Heidelberg University | 67.7  | 396.62 | 1553.38 | 31.17 | -10.08 | -5.69 |
| E1-308 | Institute of Earth Sciences, Heidelberg University | 67.95 | 397.64 | 1552.36 | 30.71 | -10.20 | -5.70 |
| E1-309 | Institute of Earth Sciences, Heidelberg University | 68.2  | 398.46 | 1551.54 | 30.33 | -10.23 | -5.42 |
| E1-310 | Institute of Earth Sciences, Heidelberg University | 68.45 | 399.31 | 1550.69 | 29.90 | -10.33 | -5.50 |
| E1-311 | Institute of Earth Sciences, Heidelberg University | 68.7  | 400.20 | 1549.80 | 29.49 | -10.24 | -5.24 |
| E1-312 | Institute of Earth Sciences, Heidelberg University | 68.95 | 401.07 | 1548.93 | 29.01 | -10.41 | -5.61 |
| E1-313 | Institute of Earth Sciences, Heidelberg University | 69.2  | 401.95 | 1548.05 | 28.57 | -10.19 | -5.69 |
| E1-314 | Institute of Earth Sciences, Heidelberg University | 69.45 | 402.90 | 1547.10 | 28.13 | -10.13 | -5.89 |
| E1-315 | Institute of Earth Sciences, Heidelberg University | 69.7  | 403.78 | 1546.22 | 27.67 | -10.02 | -5.95 |
| E1-316 | Institute of Earth Sciences, Heidelberg University | 69.95 | 404.65 | 1545.35 | 27.18 | -10.09 | -5.82 |
| E1-317 | Institute of Earth Sciences, Heidelberg University | 70.2  | 405.51 | 1544.49 | 26.68 | -10.23 | -5.62 |
| E1-318 | Institute of Earth Sciences, Heidelberg University | 70.45 | 406.19 | 1543.81 | 26.36 | -10.20 | -5.48 |
| E1-319 | Institute of Earth Sciences, Heidelberg University | 70.7  | 407.15 | 1542.85 | 25.64 | -10.27 | -5.38 |
| E1-320 | Institute of Earth Sciences, Heidelberg University | 70.95 | 408.08 | 1541.92 | 25.01 | -9.97  | -5.13 |
| E1-321 | Institute of Earth Sciences, Heidelberg University | 71.2  | 408.92 | 1541.08 | 24.44 | -10.02 | -5.10 |
| E1-322 | Institute of Earth Sciences, Heidelberg University | 71.45 | 409.76 | 1540.24 | 24.01 | -9.96  | -5.19 |
| E1-323 | Institute of Earth Sciences, Heidelberg University | 71.7  | 410.69 | 1539.31 | 23.28 | -9.89  | -5.20 |
| E1-324 | Institute of Earth Sciences, Heidelberg University | 71.95 | 411.58 | 1538.42 | 22.53 | -9.85  | -5.14 |
| E1-325 | Institute of Earth Sciences, Heidelberg University | 72.2  | 412.25 | 1537.75 | 22.21 | -9.91  | -5.29 |
| E1-326 | Institute of Earth Sciences, Heidelberg University | 72.45 | 413.06 | 1536.94 | 21.69 | -9.83  | -5.35 |
| E1-327 | Institute of Earth Sciences, Heidelberg University | 72.7  | 413.91 | 1536.09 | 20.94 | -10.00 | -5.47 |
| E1-328 | Institute of Earth Sciences, Heidelberg University | 72.95 | 414.89 | 1535.11 | 20.00 | -9.83  | -5.30 |
| E1-329 | Institute of Earth Sciences, Heidelberg University | 73.2  | 415.70 | 1534.30 | 19.55 | -10.19 | -5.65 |
| E1-330 | Institute of Earth Sciences, Heidelberg University | 73.45 | 416.57 | 1533.43 | 18.66 | -9.88  | -5.49 |
| E1-331 | Institute of Earth Sciences, Heidelberg University | 73.7  | 417.43 | 1532.57 | 18.08 | -9.99  | -5.41 |
| E1-333 | Institute of Earth Sciences, Heidelberg University | 74.2  | 419.34 | 1530.66 | 16.30 | -10.01 | -5.52 |
| E1-334 | Institute of Earth Sciences, Heidelberg University | 74.45 | 420.29 | 1529.71 | 15.46 | -10.03 | -5.52 |
| E1-335 | Institute of Earth Sciences, Heidelberg University | 74.7  | 421.36 | 1528.64 | 14.40 | -10.12 | -5.52 |
| E1-336 | Institute of Earth Sciences, Heidelberg University | 74.95 | 422.24 | 1527.76 | 13.71 | -10.17 | -5.34 |
| E1-337 | Institute of Earth Sciences, Heidelberg University | 75.2  | 422.98 | 1527.02 | 13.60 | -9.47  | -4.78 |
| E1-338 | Institute of Earth Sciences, Heidelberg University | 75.45 | 423.82 | 1526.18 | 13.73 | -9.43  | -4.71 |
| E1-339 | Institute of Earth Sciences, Heidelberg University | 75.7  | 424.61 | 1525.39 | 13.71 | -9.46  | -4.62 |
| E1-340 | Institute of Earth Sciences, Heidelberg University | 75.95 | 425.30 | 1524.70 | 13.62 | -9.04  | -4.47 |

|        |                                                    |       |        |         |       |        |       |
|--------|----------------------------------------------------|-------|--------|---------|-------|--------|-------|
| E1-341 | Institute of Earth Sciences, Heidelberg University | 76.2  | 426.12 | 1523.88 | 13.37 | -8.90  | -4.34 |
| E1-342 | Institute of Earth Sciences, Heidelberg University | 76.45 | 426.96 | 1523.04 | 13.28 | -9.21  | -4.41 |
| E1-343 | Institute of Earth Sciences, Heidelberg University | 76.7  | 427.69 | 1522.31 | 13.20 | -9.27  | -4.38 |
| E1-344 | Institute of Earth Sciences, Heidelberg University | 76.95 | 428.38 | 1521.62 | 13.13 | -9.78  | -4.92 |
| E1-345 | Institute of Earth Sciences, Heidelberg University | 77.2  | 429.21 | 1520.79 | 13.01 | -9.39  | -4.83 |
| E1-346 | Institute of Earth Sciences, Heidelberg University | 77.45 | 429.86 | 1520.14 | 13.14 | -8.97  | -5.18 |
| E1-347 | Institute of Earth Sciences, Heidelberg University | 77.7  | 430.73 | 1519.27 | 13.06 | -9.38  | -5.07 |
| E1-348 | Institute of Earth Sciences, Heidelberg University | 77.95 | 431.66 | 1518.34 | 12.97 | -9.62  | -5.22 |
| E1-349 | Institute of Earth Sciences, Heidelberg University | 78.2  | 432.51 | 1517.49 | 12.95 | -9.71  | -5.29 |
| E1-350 | Institute of Earth Sciences, Heidelberg University | 78.45 | 433.32 | 1516.68 | 12.99 | -9.86  | -5.23 |
| E1-351 | Institute of Earth Sciences, Heidelberg University | 78.7  | 434.01 | 1515.99 | 13.02 | -10.14 | -5.63 |
| E1-352 | Institute of Earth Sciences, Heidelberg University | 78.95 | 434.82 | 1515.18 | 13.10 | -9.96  | -5.56 |
| E1-353 | Institute of Earth Sciences, Heidelberg University | 79.2  | 435.66 | 1514.34 | 13.05 | -10.00 | -5.89 |
| E1-354 | Institute of Earth Sciences, Heidelberg University | 79.45 | 436.43 | 1513.57 | 13.11 | -9.95  | -5.88 |
| E1-355 | Institute of Earth Sciences, Heidelberg University | 79.7  | 437.22 | 1512.78 | 13.13 | -9.99  | -5.87 |
| E1-356 | Institute of Earth Sciences, Heidelberg University | 79.95 | 438.07 | 1511.93 | 13.08 | -10.40 | -6.20 |
| E1-357 | Institute of Earth Sciences, Heidelberg University | 80.2  | 438.95 | 1511.05 | 13.17 | -9.61  | -5.81 |
| E1-358 | Institute of Earth Sciences, Heidelberg University | 80.45 | 439.72 | 1510.28 | 13.12 | -10.17 | -5.97 |
| E1-359 | Institute of Earth Sciences, Heidelberg University | 80.7  | 440.46 | 1509.54 | 13.13 | -9.77  | -5.82 |
| E1-360 | Institute of Earth Sciences, Heidelberg University | 80.95 | 441.23 | 1508.77 | 13.26 | -9.81  | -5.92 |
| E1-361 | Institute of Earth Sciences, Heidelberg University | 81.2  | 442.08 | 1507.92 | 13.33 | -10.36 | -6.37 |
| E1-362 | Institute of Earth Sciences, Heidelberg University | 81.45 | 442.86 | 1507.14 | 13.52 | -9.86  | -6.13 |
| E1-363 | Institute of Earth Sciences, Heidelberg University | 81.7  | 443.71 | 1506.29 | 13.41 | -9.74  | -6.19 |
| E1-364 | Institute of Earth Sciences, Heidelberg University | 81.95 | 444.47 | 1505.53 | 13.66 | -10.33 | -6.25 |
| E1-365 | Institute of Earth Sciences, Heidelberg University | 82.2  | 445.24 | 1504.76 | 13.75 | -10.35 | -7.09 |
| E1-366 | Institute of Earth Sciences, Heidelberg University | 82.45 | 445.97 | 1504.03 | 13.66 | -10.05 | -6.23 |
| E1-367 | Institute of Earth Sciences, Heidelberg University | 82.7  | 446.77 | 1503.23 | 13.66 | -10.24 | -6.54 |
| E1-368 | Institute of Earth Sciences, Heidelberg University | 82.95 | 447.53 | 1502.47 | 13.89 | -10.50 | -6.10 |
| E1-369 | Institute of Earth Sciences, Heidelberg University | 83.2  | 448.37 | 1501.63 | 13.92 | -10.12 | -6.17 |
| E1-370 | Institute of Earth Sciences, Heidelberg University | 83.45 | 449.24 | 1500.76 | 13.88 | -10.58 | -6.08 |
| E1-371 | Institute of Earth Sciences, Heidelberg University | 83.7  | 450.07 | 1499.93 | 13.75 | -10.19 | -5.82 |
| E1-372 | Institute of Earth Sciences, Heidelberg University | 83.95 | 450.84 | 1499.16 | 13.82 | -9.96  | -5.59 |
| E1-374 | Institute of Earth Sciences, Heidelberg University | 84.45 | 452.36 | 1497.64 | 13.58 | -10.41 | -4.89 |
| E1-375 | Institute of Earth Sciences, Heidelberg University | 84.7  | 453.12 | 1496.88 | 13.36 | -9.99  | -5.05 |
| E1-376 | Institute of Earth Sciences, Heidelberg University | 84.95 | 453.92 | 1496.08 | 13.22 | -10.06 | -4.75 |
| E1-377 | Institute of Earth Sciences, Heidelberg University | 85.2  | 454.61 | 1495.39 | 12.91 | -10.22 | -4.48 |
| E1-378 | Institute of Earth Sciences, Heidelberg University | 85.45 | 455.37 | 1494.63 | 12.98 | -9.36  | -4.35 |
| E1-379 | Institute of Earth Sciences, Heidelberg University | 85.7  | 456.20 | 1493.80 | 12.95 | -10.28 | -4.60 |
| E1-380 | Institute of Earth Sciences, Heidelberg University | 85.95 | 456.99 | 1493.01 | 12.84 | -10.66 | -4.58 |
| E1-381 | Institute of Earth Sciences, Heidelberg University | 86.2  | 457.79 | 1492.21 | 12.70 | -11.16 | -4.71 |
| E1-382 | Institute of Earth Sciences, Heidelberg University | 86.45 | 458.50 | 1491.50 | 12.68 | -11.04 | -4.45 |
| E1-384 | Institute of Earth Sciences, Heidelberg University | 86.95 | 460.25 | 1489.75 | 13.01 | -11.59 | -5.11 |
| E1-385 | Institute of Earth Sciences, Heidelberg University | 87.2  | 461.08 | 1488.92 | 13.30 | -11.60 | -5.27 |
| E1-387 | Institute of Earth Sciences, Heidelberg University | 87.7  | 462.96 | 1487.04 | 14.30 | -11.60 | -5.38 |
| E1-388 | Institute of Earth Sciences, Heidelberg University | 87.95 | 463.84 | 1486.16 | 14.73 | -11.50 | -5.35 |
| E1-389 | Institute of Earth Sciences, Heidelberg University | 88.2  | 464.75 | 1485.25 | 15.21 | -11.03 | -5.43 |
| E1-390 | Institute of Earth Sciences, Heidelberg University | 88.45 | 465.67 | 1484.33 | 15.72 | -11.37 | -5.49 |
| E1-391 | Institute of Earth Sciences, Heidelberg University | 88.7  | 466.61 | 1483.39 | 16.19 | -11.36 | -5.64 |
| E1-392 | Institute of Earth Sciences, Heidelberg University | 88.95 | 467.62 | 1482.38 | 16.53 | -11.13 | -5.54 |
| E1-393 | Institute of Earth Sciences, Heidelberg University | 89.2  | 468.58 | 1481.42 | 16.82 | -11.17 | -5.50 |
| E1-394 | Institute of Earth Sciences, Heidelberg University | 89.45 | 469.67 | 1480.33 | 17.36 | -11.04 | -5.78 |
| E1-395 | Institute of Earth Sciences, Heidelberg University | 89.7  | 470.74 | 1479.26 | 18.05 | -10.92 | -5.58 |
| E1-396 | Institute of Earth Sciences, Heidelberg University | 89.95 | 471.90 | 1478.10 | 18.47 | -11.29 | -5.51 |
| E1-397 | Institute of Earth Sciences, Heidelberg University | 90.2  | 473.22 | 1476.78 | 19.00 | -11.24 | -5.48 |
| E1-398 | Institute of Earth Sciences, Heidelberg University | 90.45 | 474.60 | 1475.40 | 19.89 | -11.11 | -5.26 |
| E1-399 | Institute of Earth Sciences, Heidelberg University | 90.7  | 476.49 | 1473.51 | 20.39 | -11.06 | -5.28 |
| E1-400 | Institute of Earth Sciences, Heidelberg University | 90.95 | 478.90 | 1471.10 | 20.37 | -11.32 | -5.39 |
| E1-401 | Institute of Earth Sciences, Heidelberg University | 91.2  | 481.73 | 1468.27 | 20.16 | -11.48 | -5.65 |
| E1-402 | Institute of Earth Sciences, Heidelberg University | 91.45 | 484.92 | 1465.08 | 20.34 | -11.27 | -5.70 |
| E1-403 | Institute of Earth Sciences, Heidelberg University | 91.7  | 488.12 | 1461.88 | 21.04 | -11.15 | -5.61 |
| E1-404 | Institute of Earth Sciences, Heidelberg University | 91.95 | 490.74 | 1459.26 | 21.83 | -11.12 | -5.42 |
| E1-405 | Institute of Earth Sciences, Heidelberg University | 92.2  | 492.70 | 1457.30 | 22.76 | -11.15 | -5.54 |
| E1-406 | Institute of Earth Sciences, Heidelberg University | 92.45 | 494.06 | 1455.94 | 23.81 | -11.40 | -5.56 |
| E1-408 | Institute of Earth Sciences, Heidelberg University | 92.95 | 496.41 | 1453.59 | 25.75 | -11.60 | -6.08 |
| E1-409 | Institute of Earth Sciences, Heidelberg University | 93.2  | 497.50 | 1452.50 | 26.96 | -11.51 | -5.99 |
| E1-410 | Institute of Earth Sciences, Heidelberg University | 93.45 | 498.53 | 1451.47 | 28.12 | -11.68 | -6.25 |
| E1-411 | Institute of Earth Sciences, Heidelberg University | 93.7  | 499.36 | 1450.64 | 29.07 | -11.57 | -6.17 |
| E1-412 | Institute of Earth Sciences, Heidelberg University | 93.95 | 500.21 | 1449.79 | 29.87 | -11.44 | -6.34 |
| E1-413 | Institute of Earth Sciences, Heidelberg University | 94.2  | 500.95 | 1449.05 | 30.84 | -11.56 | -6.27 |
| E1-414 | Institute of Earth Sciences, Heidelberg University | 94.45 | 501.74 | 1448.26 | 31.66 | -11.32 | -6.32 |
| E1-415 | Institute of Earth Sciences, Heidelberg University | 94.7  | 502.57 | 1447.43 | 32.59 | -11.26 | -5.98 |
| E1-416 | Institute of Earth Sciences, Heidelberg University | 94.95 | 503.36 | 1446.64 | 33.41 | -11.36 | -5.48 |
| E1-417 | Institute of Earth Sciences, Heidelberg University | 95.2  | 504.28 | 1445.72 | 34.29 | -11.71 | -5.79 |
| E1-418 | Institute of Earth Sciences, Heidelberg University | 95.45 | 505.25 | 1444.75 | 35.22 | -10.96 | -5.52 |
| E1-419 | Institute of Earth Sciences, Heidelberg University | 95.7  | 506.22 | 1443.78 | 36.12 | -10.08 | -4.91 |

10 Table S 6 Stable isotope data of speleothem E23-3. The age of each sample corresponds to the chronology discussed in the main text.

| Sample ID | Lab                                                | dft<br>[cm] | Age [a BP] | Age<br>[a AD] | Age error<br>[a] | $\delta^{13}\text{C}$<br>[‰ VPDB] | $\delta^{18}\text{O}$<br>[‰ VPDB] |
|-----------|----------------------------------------------------|-------------|------------|---------------|------------------|-----------------------------------|-----------------------------------|
| E23-3-001 | Institute of Earth Sciences, Heidelberg University | 0.15        | -70.84     | 2020.84       |                  | -11.92                            | -5.04                             |
| E23-3-002 | Institute of Earth Sciences, Heidelberg University | 0.4         | -68.93     | 2018.93       |                  | -12.31                            | -5.02                             |
| E23-3-003 | Institute of Earth Sciences, Heidelberg University | 0.65        | -67.34     | 2017.34       |                  | -12.07                            | -4.95                             |
| E23-3-004 | Institute of Earth Sciences, Heidelberg University | 0.9         | -65.61     | 2015.61       |                  | -12.28                            | -5.08                             |
| E23-3-005 | Institute of Earth Sciences, Heidelberg University | 1.15        | -64.11     | 2014.11       |                  | -12.26                            | -5.28                             |
| E23-3-006 | Institute of Earth Sciences, Heidelberg University | 1.4         | -62.56     | 2012.56       |                  | -11.73                            | -5.18                             |
| E23-3-007 | Institute of Earth Sciences, Heidelberg University | 1.65        | -61.20     | 2011.20       |                  | -11.76                            | -5.24                             |
| E23-3-008 | Institute of Earth Sciences, Heidelberg University | 1.9         | -59.28     | 2009.28       |                  | -11.93                            | -4.73                             |
| E23-3-009 | Institute of Earth Sciences, Heidelberg University | 2.15        | -57.55     | 2007.55       |                  | -11.50                            | -4.30                             |
| E23-3-010 | Institute of Earth Sciences, Heidelberg University | 2.4         | -56.60     | 2006.60       |                  | -11.15                            | -4.19                             |
| E23-3-011 | Institute of Earth Sciences, Heidelberg University | 2.65        | -55.78     | 2005.78       |                  | -11.08                            | -4.20                             |
| E23-3-012 | Institute of Earth Sciences, Heidelberg University | 2.9         | -54.74     | 2004.74       |                  | -11.03                            | -4.22                             |
| E23-3-013 | Institute of Earth Sciences, Heidelberg University | 3.15        | -53.94     | 2003.94       |                  | -10.88                            | -4.21                             |
| E23-3-014 | Institute of Earth Sciences, Heidelberg University | 3.4         | -52.32     | 2002.32       |                  | -11.13                            | -4.21                             |
| E23-3-015 | Institute of Earth Sciences, Heidelberg University | 3.65        | -50.80     | 2000.80       |                  | -11.02                            | -4.19                             |
| E23-3-016 | Institute of Earth Sciences, Heidelberg University | 3.9         | -50.02     | 2000.02       |                  | -10.73                            | -4.22                             |
| E23-3-017 | Institute of Earth Sciences, Heidelberg University | 4.15        | -49.37     | 1999.37       |                  | -10.56                            | -4.22                             |
| E23-3-018 | Institute of Earth Sciences, Heidelberg University | 4.4         | -48.07     | 1998.07       |                  | -10.00                            | -4.03                             |
| E23-3-019 | Institute of Earth Sciences, Heidelberg University | 4.65        | -47.09     | 1997.09       |                  | -10.36                            | -4.17                             |
| E23-3-020 | Institute of Earth Sciences, Heidelberg University | 4.9         | -46.44     | 1996.44       |                  | -10.79                            | -4.26                             |
| E23-3-021 | Institute of Earth Sciences, Heidelberg University | 5.15        | -45.26     | 1995.26       |                  | -11.31                            | -4.51                             |
| E23-3-022 | Institute of Earth Sciences, Heidelberg University | 5.4         | -44.11     | 1994.11       |                  | -11.00                            | -4.37                             |
| E23-3-023 | Institute of Earth Sciences, Heidelberg University | 5.65        | -42.97     | 1992.97       |                  | -10.89                            | -4.47                             |
| E23-3-024 | Institute of Earth Sciences, Heidelberg University | 5.9         | -40.83     | 1990.83       |                  | -10.20                            | -4.10                             |
| E23-3-025 | Institute of Earth Sciences, Heidelberg University | 6.15        | -40.25     | 1990.25       |                  | -9.68                             | -3.99                             |
| E23-3-026 | Institute of Earth Sciences, Heidelberg University | 6.4         | -38.74     | 1988.74       |                  | -10.48                            | -4.26                             |
| E23-3-027 | Institute of Earth Sciences, Heidelberg University | 6.65        | -37.85     | 1987.85       |                  | -10.06                            | -4.20                             |
| E23-3-028 | Institute of Earth Sciences, Heidelberg University | 6.9         | -36.77     | 1986.77       |                  | -11.07                            | -4.48                             |
| E23-3-029 | Institute of Earth Sciences, Heidelberg University | 7.15        | -35.73     | 1985.73       |                  | -11.02                            | -4.82                             |
| E23-3-030 | Institute of Earth Sciences, Heidelberg University | 7.4         | -35.14     | 1985.14       |                  | -11.38                            | -5.01                             |
| E23-3-031 | Institute of Earth Sciences, Heidelberg University | 7.65        | -34.13     | 1984.13       |                  | -11.16                            | -5.03                             |
| E23-3-032 | Institute of Earth Sciences, Heidelberg University | 7.9         | -33.14     | 1983.14       |                  | -10.60                            | -4.59                             |
| E23-3-033 | Institute of Earth Sciences, Heidelberg University | 8.15        | -32.46     | 1982.46       |                  | -10.74                            | -4.33                             |
| E23-3-034 | Institute of Earth Sciences, Heidelberg University | 8.4         | -31.84     | 1981.84       |                  | -10.17                            | -4.04                             |
| E23-3-035 | Institute of Earth Sciences, Heidelberg University | 8.65        | -31.11     | 1981.11       |                  | -11.24                            | -4.19                             |
| E23-3-036 | Institute of Earth Sciences, Heidelberg University | 8.9         | -30.36     | 1980.36       |                  | -10.91                            | -3.93                             |
| E23-3-037 | Institute of Earth Sciences, Heidelberg University | 9.15        | -29.34     | 1979.34       |                  | -11.06                            | -4.21                             |
| E23-3-038 | Institute of Earth Sciences, Heidelberg University | 9.4         | -28.52     | 1978.52       |                  | -11.13                            | -4.28                             |
| E23-3-039 | Institute of Earth Sciences, Heidelberg University | 9.65        | -27.78     | 1977.78       |                  | -10.92                            | -4.21                             |
| E23-3-040 | Institute of Earth Sciences, Heidelberg University | 9.9         | -26.88     | 1976.88       |                  | -11.13                            | -4.33                             |
| E23-3-041 | Institute of Earth Sciences, Heidelberg University | 10.15       | -26.10     | 1976.10       |                  | -10.91                            | -4.34                             |
| E23-3-042 | Institute of Earth Sciences, Heidelberg University | 10.4        | -24.99     | 1974.99       |                  | -10.60                            | -4.34                             |
| E23-3-043 | Institute of Earth Sciences, Heidelberg University | 10.65       | -23.68     | 1973.68       |                  | -10.89                            | -4.53                             |
| E23-3-044 | Institute of Earth Sciences, Heidelberg University | 10.9        | -21.98     | 1971.98       |                  | -11.15                            | -4.60                             |
| E23-3-045 | Institute of Earth Sciences, Heidelberg University | 11.15       | -20.60     | 1970.60       |                  | -11.33                            | -4.81                             |
| E23-3-046 | Institute of Earth Sciences, Heidelberg University | 11.4        | -19.45     | 1969.45       |                  | -10.81                            | -4.56                             |
| E23-3-047 | Institute of Earth Sciences, Heidelberg University | 11.65       | -18.19     | 1968.19       |                  | -10.43                            | -4.36                             |
| E23-3-048 | Institute of Earth Sciences, Heidelberg University | 11.9        | -17.44     | 1967.44       |                  | -10.39                            | -4.04                             |
| E23-3-049 | Institute of Earth Sciences, Heidelberg University | 12.15       | -16.80     | 1966.80       |                  | -10.51                            | -4.01                             |
| E23-3-050 | Institute of Earth Sciences, Heidelberg University | 12.4        | -15.60     | 1965.60       |                  | -10.74                            | -4.16                             |
| E23-3-051 | Institute of Earth Sciences, Heidelberg University | 12.65       | -13.78     | 1963.78       |                  | -11.25                            | -4.30                             |
| E23-3-052 | Institute of Earth Sciences, Heidelberg University | 12.9        | -12.95     | 1962.95       |                  | -10.77                            | -4.35                             |
| E23-3-053 | Institute of Earth Sciences, Heidelberg University | 13.15       | -11.51     | 1961.51       |                  | -10.82                            | -4.34                             |
| E23-3-054 | Institute of Earth Sciences, Heidelberg University | 13.4        | -10.77     | 1960.77       |                  |                                   |                                   |
| E23-3-055 | Institute of Earth Sciences, Heidelberg University | 13.65       | -10.16     | 1960.16       |                  | -11.02                            | -4.50                             |
| E23-3-056 | Institute of Earth Sciences, Heidelberg University | 13.9        | -9.47      | 1959.47       |                  | -11.21                            | -4.66                             |
| E23-3-057 | Institute of Earth Sciences, Heidelberg University | 14.15       | -8.57      | 1958.57       |                  | -10.88                            | -4.47                             |
| E23-3-058 | Institute of Earth Sciences, Heidelberg University | 14.4        | -7.59      | 1957.59       |                  | -11.33                            | -4.73                             |
| E23-3-059 | Institute of Earth Sciences, Heidelberg University | 14.65       | -6.70      | 1956.70       |                  | -11.35                            | -4.91                             |
| E23-3-060 | Institute of Earth Sciences, Heidelberg University | 14.9        | -5.56      | 1955.56       |                  | -10.61                            | -4.93                             |
| E23-3-061 | Institute of Earth Sciences, Heidelberg University | 15.15       | -4.74      | 1954.74       |                  | -9.91                             | -5.06                             |
| E23-3-062 | Institute of Earth Sciences, Heidelberg University | 15.4        | -4.16      | 1954.16       |                  | -11.05                            | -5.37                             |
| E23-3-063 | Institute of Earth Sciences, Heidelberg University | 15.65       | -3.53      | 1953.53       |                  | -10.43                            | -5.34                             |
| E23-3-064 | Institute of Earth Sciences, Heidelberg University | 15.9        | -2.90      | 1952.90       |                  | -10.26                            | -5.27                             |
| E23-3-065 | Institute of Earth Sciences, Heidelberg University | 16.15       | -2.33      | 1952.33       |                  | -10.81                            | -5.44                             |
| E23-3-066 | Institute of Earth Sciences, Heidelberg University | 16.4        | -1.69      | 1951.69       |                  | -10.07                            | -5.22                             |
| E23-3-067 | Institute of Earth Sciences, Heidelberg University | 16.65       | -0.99      | 1950.99       |                  | -10.45                            | -4.79                             |
| E23-3-068 | Institute of Earth Sciences, Heidelberg University | 16.9        | -0.35      | 1950.35       |                  | -10.81                            | -4.60                             |
| E23-3-069 | Institute of Earth Sciences, Heidelberg University | 17.15       | 0.28       | 1949.72       |                  | -10.27                            | -4.23                             |
| E23-3-070 | Institute of Earth Sciences, Heidelberg University | 17.4        | 0.90       | 1949.10       |                  | -11.51                            | -4.65                             |
| E23-3-071 | Institute of Earth Sciences, Heidelberg University | 17.65       | 1.43       | 1948.57       |                  | -9.73                             | -4.08                             |
| E23-3-072 | Institute of Earth Sciences, Heidelberg University | 17.9        | 1.85       | 1948.15       |                  | -10.90                            | -4.17                             |
| E23-3-073 | Institute of Earth Sciences, Heidelberg University | 18.15       | 2.27       | 1947.73       |                  | -9.90                             | -4.15                             |
| E23-3-074 | Institute of Earth Sciences, Heidelberg University | 18.4        | 2.67       | 1947.33       |                  | -9.84                             | -4.30                             |
| E23-3-075 | Institute of Earth Sciences, Heidelberg University | 18.65       | 3.16       | 1946.84       |                  | -10.69                            | -4.40                             |
| E23-3-076 | Institute of Earth Sciences, Heidelberg University | 18.9        | 3.79       | 1946.21       |                  | -11.53                            | -4.60                             |

|           |                                                    |       |        |         |        |       |
|-----------|----------------------------------------------------|-------|--------|---------|--------|-------|
| E23-3-077 | Institute of Earth Sciences, Heidelberg University | 19.15 | 4.43   | 1945.57 | -10.60 | -4.32 |
| E23-3-078 | Institute of Earth Sciences, Heidelberg University | 19.4  | 5.11   | 1944.89 | -10.98 | -4.33 |
| E23-3-079 | Institute of Earth Sciences, Heidelberg University | 19.65 | 6.01   | 1943.99 | -11.36 | -4.58 |
| E23-3-080 | Institute of Earth Sciences, Heidelberg University | 19.9  | 6.62   | 1943.38 | -10.26 | -4.24 |
| E23-3-081 | Institute of Earth Sciences, Heidelberg University | 20.15 | 7.14   | 1942.86 | -10.23 | -4.35 |
| E23-3-082 | Institute of Earth Sciences, Heidelberg University | 20.4  | 7.57   | 1942.43 | -9.43  | -4.12 |
| E23-3-083 | Institute of Earth Sciences, Heidelberg University | 20.65 | 8.06   | 1941.94 | -10.98 | -4.43 |
| E23-3-084 | Institute of Earth Sciences, Heidelberg University | 20.9  | 8.72   | 1941.28 | -11.42 | -4.65 |
| E23-3-085 | Institute of Earth Sciences, Heidelberg University | 21.15 | 9.43   | 1940.57 | -11.43 | -4.79 |
| E23-3-086 | Institute of Earth Sciences, Heidelberg University | 21.4  | 10.27  | 1939.73 | -11.71 | -4.97 |
| E23-3-087 | Institute of Earth Sciences, Heidelberg University | 21.65 | 11.31  | 1938.69 | -11.29 | -4.97 |
| E23-3-088 | Institute of Earth Sciences, Heidelberg University | 21.9  | 12.05  | 1937.95 | -11.28 | -5.14 |
| E23-3-089 | Institute of Earth Sciences, Heidelberg University | 22.15 | 12.52  | 1937.48 | -10.04 | -4.78 |
| E23-3-090 | Institute of Earth Sciences, Heidelberg University | 22.4  | 12.97  | 1937.03 | -11.03 | -5.22 |
| E23-3-091 | Institute of Earth Sciences, Heidelberg University | 22.65 | 13.46  | 1936.54 | -10.02 | -5.13 |
| E23-3-092 | Institute of Earth Sciences, Heidelberg University | 22.9  | 14.00  | 1936.00 | -10.41 | -5.20 |
| E23-3-093 | Institute of Earth Sciences, Heidelberg University | 23.15 | 15.12  | 1934.88 | -9.89  | -5.14 |
| E23-3-094 | Institute of Earth Sciences, Heidelberg University | 23.4  | 15.75  | 1934.25 | -10.93 | -5.12 |
| E23-3-095 | Institute of Earth Sciences, Heidelberg University | 23.65 | 16.43  | 1933.57 | -12.33 | -5.44 |
| E23-3-096 | Institute of Earth Sciences, Heidelberg University | 23.9  | 17.08  | 1932.92 | -11.50 | -4.97 |
| E23-3-097 | Institute of Earth Sciences, Heidelberg University | 24.15 | 17.62  | 1932.38 | -11.81 | -5.09 |
| E23-3-098 | Institute of Earth Sciences, Heidelberg University | 24.4  | 18.15  | 1931.85 | -10.89 | -4.64 |
| E23-3-099 | Institute of Earth Sciences, Heidelberg University | 24.65 | 18.70  | 1931.30 | -11.79 | -4.88 |
| E23-3-100 | Institute of Earth Sciences, Heidelberg University | 24.9  | 19.21  | 1930.79 | -10.74 | -4.68 |
| E23-3-101 | Institute of Earth Sciences, Heidelberg University | 25.15 | 19.52  | 1930.48 | -10.76 | -4.46 |
| E23-3-102 | Institute of Earth Sciences, Heidelberg University | 25.4  | 19.74  | 1930.26 | -11.75 | -4.79 |
| E23-3-103 | Institute of Earth Sciences, Heidelberg University | 25.65 | 20.03  | 1929.97 | -11.26 | -4.67 |
| E23-3-104 | Institute of Earth Sciences, Heidelberg University | 25.9  | 20.41  | 1929.59 | -12.28 | -4.85 |
| E23-3-105 | Institute of Earth Sciences, Heidelberg University | 26.15 | 20.89  | 1929.11 | -12.09 | -4.88 |
| E23-3-106 | Institute of Earth Sciences, Heidelberg University | 26.4  | 21.62  | 1928.38 | -11.49 | -4.87 |
| E23-3-107 | Institute of Earth Sciences, Heidelberg University | 26.65 | 22.55  | 1927.45 |        |       |
| E23-3-108 | Institute of Earth Sciences, Heidelberg University | 26.9  | 23.68  | 1926.32 | -11.93 | -5.08 |
| E23-3-109 | Institute of Earth Sciences, Heidelberg University | 27.15 | 25.89  | 1924.11 | -11.89 | -4.86 |
| E23-3-110 | Institute of Earth Sciences, Heidelberg University | 27.4  | 27.56  | 1922.44 | -11.97 | -4.90 |
| E23-3-111 | Institute of Earth Sciences, Heidelberg University | 27.65 | 31.91  | 1918.09 | -11.98 | -4.75 |
| E23-3-112 | Institute of Earth Sciences, Heidelberg University | 27.9  | 33.43  | 1916.57 | -11.87 | -4.70 |
| E23-3-113 | Institute of Earth Sciences, Heidelberg University | 28.15 | 35.50  | 1914.50 | -12.26 | -5.28 |
| E23-3-114 | Institute of Earth Sciences, Heidelberg University | 28.4  | 36.54  | 1913.46 | -11.90 | -5.71 |
| E23-3-115 | Institute of Earth Sciences, Heidelberg University | 28.65 | 37.82  | 1912.18 | -11.00 | -5.40 |
| E23-3-116 | Institute of Earth Sciences, Heidelberg University | 28.9  | 39.16  | 1910.84 | -10.92 | -5.17 |
| E23-3-117 | Institute of Earth Sciences, Heidelberg University | 29.15 | 40.85  | 1909.15 | -11.57 | -5.23 |
| E23-3-118 | Institute of Earth Sciences, Heidelberg University | 29.4  | 41.91  | 1908.09 | -11.96 | -4.92 |
| E23-3-119 | Institute of Earth Sciences, Heidelberg University | 29.65 | 44.77  | 1905.23 | -11.91 | -4.72 |
| E23-3-120 | Institute of Earth Sciences, Heidelberg University | 29.9  | 49.30  | 1900.70 | -10.15 | 0.89  |
| E23-3-121 | Institute of Earth Sciences, Heidelberg University | 30.4  | 52.02  | 1897.98 | -12.17 | -4.72 |
| E23-3-122 | Institute of Earth Sciences, Heidelberg University | 30.9  | 54.35  | 1895.65 | -11.96 | -4.87 |
| E23-3-123 | Institute of Earth Sciences, Heidelberg University | 31.4  | 56.13  | 1893.87 | -11.45 | -4.95 |
| E23-3-124 | Institute of Earth Sciences, Heidelberg University | 31.9  | 57.58  | 1892.42 | -11.74 | -5.36 |
| E23-3-125 | Institute of Earth Sciences, Heidelberg University | 32.4  | 59.10  | 1890.90 | -11.39 | -5.28 |
| E23-3-126 | Institute of Earth Sciences, Heidelberg University | 32.9  | 61.95  | 1888.05 | -11.02 | -4.97 |
| E23-3-127 | Institute of Earth Sciences, Heidelberg University | 33.4  | 64.54  | 1885.46 | -11.07 | -4.63 |
| E23-3-128 | Institute of Earth Sciences, Heidelberg University | 33.9  | 67.55  | 1882.45 | -12.04 | -4.83 |
| E23-3-129 | Institute of Earth Sciences, Heidelberg University | 34.4  | 69.94  | 1880.06 | -11.65 | -4.77 |
| E23-3-130 | Institute of Earth Sciences, Heidelberg University | 34.9  | 71.94  | 1878.06 | -11.55 | -4.85 |
| E23-3-131 | Institute of Earth Sciences, Heidelberg University | 35.4  | 74.42  | 1875.58 | -11.73 | -4.98 |
| E23-3-132 | Institute of Earth Sciences, Heidelberg University | 35.9  | 77.93  | 1872.07 | -11.18 | -4.44 |
| E23-3-133 | Institute of Earth Sciences, Heidelberg University | 36.4  | 80.22  | 1869.78 | -11.54 | -4.38 |
| E23-3-134 | Institute of Earth Sciences, Heidelberg University | 36.9  | 81.81  | 1868.19 | -11.67 | -4.70 |
| E23-3-135 | Institute of Earth Sciences, Heidelberg University | 37.4  | 83.50  | 1866.50 | -11.51 | -4.77 |
| E23-3-136 | Institute of Earth Sciences, Heidelberg University | 37.9  | 85.31  | 1864.69 | -11.17 | -4.35 |
| E23-3-137 | Institute of Earth Sciences, Heidelberg University | 38.4  | 86.95  | 1863.05 | -11.05 | -4.42 |
| E23-3-138 | Institute of Earth Sciences, Heidelberg University | 38.9  | 89.79  | 1860.21 | -11.10 | -4.48 |
| E23-3-139 | Institute of Earth Sciences, Heidelberg University | 39.4  | 92.10  | 1857.90 | -10.55 | -4.37 |
| E23-3-140 | Institute of Earth Sciences, Heidelberg University | 39.9  | 94.14  | 1855.86 | -10.74 | -4.41 |
| E23-3-141 | Institute of Earth Sciences, Heidelberg University | 40.4  | 95.81  | 1854.19 | -10.51 | -4.36 |
| E23-3-142 | Institute of Earth Sciences, Heidelberg University | 40.9  | 97.24  | 1852.76 | -10.57 | -4.49 |
| E23-3-143 | Institute of Earth Sciences, Heidelberg University | 41.4  | 98.42  | 1851.58 | -10.06 | -4.64 |
| E23-3-144 | Institute of Earth Sciences, Heidelberg University | 41.9  | 100.47 | 1849.53 | -8.48  | -0.85 |
| E23-3-145 | Institute of Earth Sciences, Heidelberg University | 42.4  | 102.31 | 1847.69 | -9.47  | -4.72 |
| E23-3-146 | Institute of Earth Sciences, Heidelberg University | 42.9  | 105.51 | 1844.49 | -9.72  | -4.89 |
| E23-3-147 | Institute of Earth Sciences, Heidelberg University | 43.4  | 108.70 | 1841.30 |        |       |
| E23-3-148 | Institute of Earth Sciences, Heidelberg University | 43.9  | 112.10 | 1837.90 | -10.34 | -5.41 |
| E23-3-149 | Institute of Earth Sciences, Heidelberg University | 44.4  | 114.86 | 1835.14 | -10.06 | -4.81 |
| E23-3-150 | Institute of Earth Sciences, Heidelberg University | 44.9  | 117.68 | 1832.32 | -10.49 | -4.71 |
| E23-3-151 | Institute of Earth Sciences, Heidelberg University | 45.4  | 119.95 | 1830.05 | -10.21 | -5.09 |
| E23-3-152 | Institute of Earth Sciences, Heidelberg University | 45.9  | 122.38 | 1827.62 | -10.40 | -5.18 |
| E23-3-153 | Institute of Earth Sciences, Heidelberg University | 46.4  | 124.44 | 1825.56 | -10.12 | -5.11 |
| E23-3-154 | Institute of Earth Sciences, Heidelberg University | 46.9  | 126.61 | 1823.39 | -9.99  | -4.99 |
| E23-3-155 | Institute of Earth Sciences, Heidelberg University | 47.4  | 129.45 | 1820.55 | -9.92  | -5.08 |
| E23-3-156 | Institute of Earth Sciences, Heidelberg University | 47.9  | 131.49 | 1818.51 | -10.08 | -5.11 |

|           |                                                    |      |        |         |        |       |
|-----------|----------------------------------------------------|------|--------|---------|--------|-------|
| E23-3-157 | Institute of Earth Sciences, Heidelberg University | 48.4 | 133.25 | 1816.75 | -10.20 | -5.38 |
| E23-3-158 | Institute of Earth Sciences, Heidelberg University | 48.9 | 135.13 | 1814.87 | -9.82  | -4.96 |
| E23-3-159 | Institute of Earth Sciences, Heidelberg University | 49.4 | 136.67 | 1813.33 | -9.91  | -4.35 |
| E23-3-160 | Institute of Earth Sciences, Heidelberg University | 49.9 | 138.95 | 1811.05 | -9.85  | -4.20 |
| E23-3-161 | Institute of Earth Sciences, Heidelberg University | 50.4 | 140.43 | 1809.57 | -9.72  | -4.07 |
| E23-3-162 | Institute of Earth Sciences, Heidelberg University | 50.9 | 141.69 | 1808.31 | -9.45  | -3.97 |
| E23-3-163 | Institute of Earth Sciences, Heidelberg University | 51.4 | 142.84 | 1807.16 | -9.08  | -3.79 |
| E23-3-164 | Institute of Earth Sciences, Heidelberg University | 51.9 | 144.21 | 1805.79 | -9.30  | -3.96 |
| E23-3-165 | Institute of Earth Sciences, Heidelberg University | 52.4 | 145.59 | 1804.41 | -9.33  | -3.98 |
| E23-3-166 | Institute of Earth Sciences, Heidelberg University | 52.9 | 147.11 | 1802.89 | -9.83  | -4.31 |
| E23-3-167 | Institute of Earth Sciences, Heidelberg University | 53.4 | 149.03 | 1800.97 | -10.19 | -4.47 |
| E23-3-168 | Institute of Earth Sciences, Heidelberg University | 53.9 | 151.04 | 1798.96 | -10.14 | -4.50 |
| E23-3-169 | Institute of Earth Sciences, Heidelberg University | 54.4 | 153.45 | 1796.55 | -10.19 | -4.57 |
| E23-3-170 | Institute of Earth Sciences, Heidelberg University | 54.9 | 155.12 | 1794.88 | -9.88  | -4.61 |
| E23-3-171 | Institute of Earth Sciences, Heidelberg University | 55.4 | 156.87 | 1793.13 | -9.87  | -4.61 |
| E23-3-172 | Institute of Earth Sciences, Heidelberg University | 55.9 | 159.45 | 1790.55 | -9.77  | -4.54 |
| E23-3-173 | Institute of Earth Sciences, Heidelberg University | 56.4 | 161.10 | 1788.90 | -10.37 | -4.54 |
| E23-3-174 | Institute of Earth Sciences, Heidelberg University | 56.9 | 162.68 | 1787.32 | -11.43 | -4.68 |
| E23-3-175 | Institute of Earth Sciences, Heidelberg University | 57.4 | 164.59 | 1785.41 | -10.90 | -5.17 |
| E23-3-176 | Institute of Earth Sciences, Heidelberg University | 57.9 | 166.98 | 1783.02 | -11.06 | -5.17 |
| E23-3-177 | Institute of Earth Sciences, Heidelberg University | 58.4 | 168.47 | 1781.53 | -10.63 | -4.94 |
| E23-3-178 | Institute of Earth Sciences, Heidelberg University | 58.9 | 169.89 | 1780.11 | -10.90 | -5.57 |
| E23-3-179 | Institute of Earth Sciences, Heidelberg University | 59.4 | 171.29 | 1778.71 | -11.02 | -5.68 |
| E23-3-180 | Institute of Earth Sciences, Heidelberg University | 59.9 | 172.37 | 1777.63 | -10.92 | -5.39 |
| E23-3-181 | Institute of Earth Sciences, Heidelberg University | 60.4 | 173.23 | 1776.77 | -10.13 | -5.10 |
| E23-3-182 | Institute of Earth Sciences, Heidelberg University | 60.9 | 174.46 | 1775.54 | -10.38 | -5.29 |
| E23-3-183 | Institute of Earth Sciences, Heidelberg University | 61.4 | 175.95 | 1774.05 | -10.58 | -5.40 |
| E23-3-184 | Institute of Earth Sciences, Heidelberg University | 61.9 | 177.35 | 1772.65 | -10.14 | -5.47 |
| E23-3-185 | Institute of Earth Sciences, Heidelberg University | 62.4 | 178.83 | 1771.17 | -10.10 | -5.46 |
| E23-3-186 | Institute of Earth Sciences, Heidelberg University | 62.9 | 179.58 | 1770.42 | -9.85  | -5.49 |
| E23-3-187 | Institute of Earth Sciences, Heidelberg University | 63.4 | 180.60 | 1769.40 | -10.05 | -5.28 |
| E23-3-188 | Institute of Earth Sciences, Heidelberg University | 63.9 | 182.15 | 1767.85 | -10.22 | -5.12 |
| E23-3-189 | Institute of Earth Sciences, Heidelberg University | 64.4 | 184.76 | 1765.24 | -9.82  | -4.60 |
| E23-3-190 | Institute of Earth Sciences, Heidelberg University | 64.9 | 187.18 | 1762.82 | -10.65 | -4.71 |
| E23-3-191 | Institute of Earth Sciences, Heidelberg University | 65.4 | 188.47 | 1761.53 | -11.58 | -5.20 |
| E23-3-192 | Institute of Earth Sciences, Heidelberg University | 65.9 | 189.97 | 1760.03 | -9.77  | -5.20 |
| E23-3-193 | Institute of Earth Sciences, Heidelberg University | 66.4 | 191.51 | 1758.49 | -9.93  | -5.23 |
| E23-3-194 | Institute of Earth Sciences, Heidelberg University | 66.9 | 194.00 | 1756.00 | -9.69  | -4.89 |
| E23-3-195 | Institute of Earth Sciences, Heidelberg University | 67.4 | 195.74 | 1754.26 | -9.63  | -4.72 |
| E23-3-196 | Institute of Earth Sciences, Heidelberg University | 67.9 | 198.99 | 1751.01 | -9.60  | -4.57 |
| E23-3-197 | Institute of Earth Sciences, Heidelberg University | 68.4 | 202.12 | 1747.88 | -10.17 | -4.71 |
| E23-3-198 | Institute of Earth Sciences, Heidelberg University | 68.9 | 204.38 | 1745.62 | -11.72 | -6.17 |
| E23-3-199 | Institute of Earth Sciences, Heidelberg University | 69.4 | 207.75 | 1742.25 | -11.33 | -6.07 |
| E23-3-200 | Institute of Earth Sciences, Heidelberg University | 69.9 | 210.56 | 1739.44 | -10.79 | -5.52 |
| E23-3-201 | Institute of Earth Sciences, Heidelberg University | 70.4 | 213.02 | 1736.98 | -11.35 | -5.01 |
| E23-3-202 | Institute of Earth Sciences, Heidelberg University | 70.9 | 214.54 | 1735.46 | -11.45 | -5.36 |
| E23-3-203 | Institute of Earth Sciences, Heidelberg University | 71.4 | 215.59 | 1734.41 | -11.21 | -5.57 |
| E23-3-204 | Institute of Earth Sciences, Heidelberg University | 71.9 | 216.54 | 1733.46 | -10.47 | -5.29 |
| E23-3-205 | Institute of Earth Sciences, Heidelberg University | 72.4 | 218.02 | 1731.98 | -9.88  | -4.53 |
| E23-3-206 | Institute of Earth Sciences, Heidelberg University | 72.9 | 219.91 | 1730.09 | -9.74  | -4.24 |
| E23-3-207 | Institute of Earth Sciences, Heidelberg University | 73.4 | 221.84 | 1728.16 | -10.02 | -4.07 |
| E23-3-208 | Institute of Earth Sciences, Heidelberg University | 73.9 | 224.76 | 1725.24 | -9.86  | -4.14 |
| E23-3-209 | Institute of Earth Sciences, Heidelberg University | 74.4 | 226.42 | 1723.58 |        |       |
| E23-3-210 | Institute of Earth Sciences, Heidelberg University | 74.9 | 227.89 | 1722.11 | -11.05 | -4.82 |
| E23-3-211 | Institute of Earth Sciences, Heidelberg University | 75.4 | 230.48 | 1719.52 | -10.55 | -4.84 |
| E23-3-212 | Institute of Earth Sciences, Heidelberg University | 75.9 | 232.68 | 1717.32 | -10.23 | -4.76 |
| E23-3-213 | Institute of Earth Sciences, Heidelberg University | 76.4 | 234.55 | 1715.45 | -10.20 | -4.62 |
| E23-3-214 | Institute of Earth Sciences, Heidelberg University | 76.9 | 236.35 | 1713.65 | -10.12 | -4.67 |
| E23-3-215 | Institute of Earth Sciences, Heidelberg University | 77.4 | 238.27 | 1711.73 | -10.12 | -4.69 |
| E23-3-216 | Institute of Earth Sciences, Heidelberg University | 77.9 | 240.58 | 1709.42 | -10.34 | -4.74 |
| E23-3-217 | Institute of Earth Sciences, Heidelberg University | 78.4 | 242.42 | 1707.58 | -10.50 | -4.98 |
| E23-3-218 | Institute of Earth Sciences, Heidelberg University | 78.9 | 243.49 | 1706.51 | -10.04 | -4.98 |
| E23-3-219 | Institute of Earth Sciences, Heidelberg University | 79.4 | 244.31 | 1705.69 | -9.89  | -4.97 |
| E23-3-220 | Institute of Earth Sciences, Heidelberg University | 79.9 | 245.11 | 1704.89 | -10.26 | -5.04 |
| E23-3-221 | Institute of Earth Sciences, Heidelberg University | 80.4 | 246.17 | 1703.83 | -10.67 | -5.10 |
| E23-3-222 | Institute of Earth Sciences, Heidelberg University | 80.9 | 249.05 | 1700.95 | -10.17 | -5.01 |
| E23-3-223 | Institute of Earth Sciences, Heidelberg University | 81.4 | 251.06 | 1698.94 | -10.78 | -5.39 |
| E23-3-224 | Institute of Earth Sciences, Heidelberg University | 81.9 | 252.88 | 1697.12 | -10.40 | -5.44 |
| E23-3-225 | Institute of Earth Sciences, Heidelberg University | 82.4 | 254.82 | 1695.18 | -10.75 | -5.48 |
| E23-3-226 | Institute of Earth Sciences, Heidelberg University | 82.9 |        |         | -7.92  | -4.73 |
| E23-3-227 | Institute of Earth Sciences, Heidelberg University | 83.4 |        |         | -8.62  | -5.00 |
| E23-3-228 | Institute of Earth Sciences, Heidelberg University | 83.9 |        |         | -8.66  | -4.89 |
